# Supplementary material for: Duplication of a Pks gene cluster and subsequent functional diversification facilitate environmental adaptation in Metarhizium species
Source: PubMed Central journal article supplement (PMC6042797; doi:10.1371/journal.pgen.1007472), 2018-06-29
Supplement: pgen.1007472.s001.pdf [file pgen.1007472.s001.pdf]

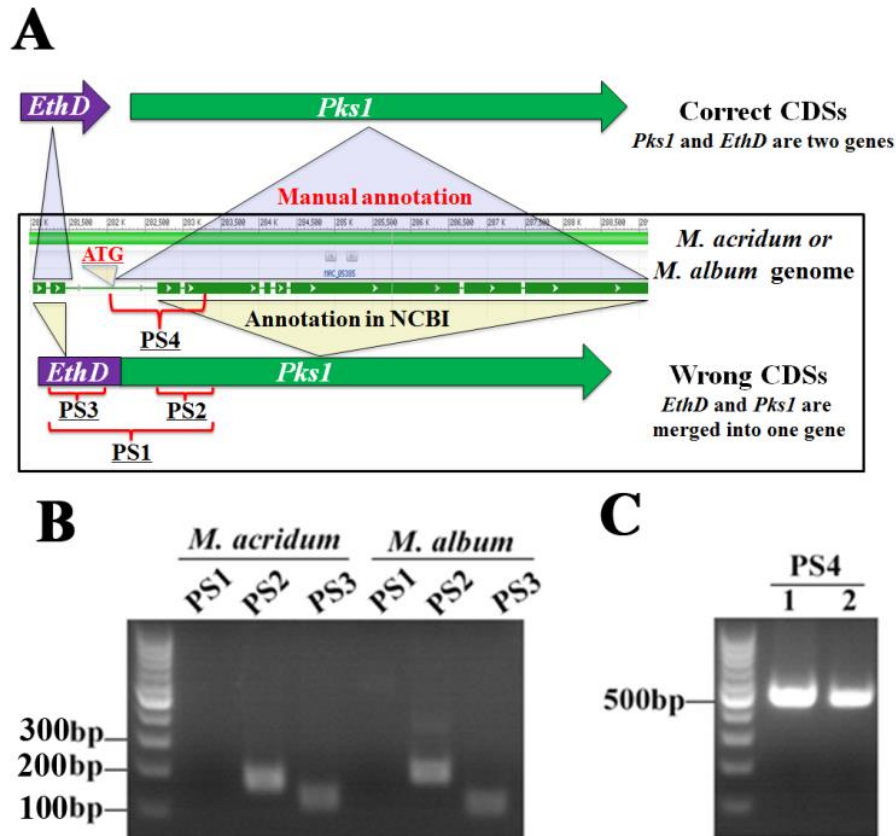

**S1 Fig:** Manual annotation of the *Pks1* gene in *M. acridum* and *M. album*. (A) A schematic diagram showing the reannotation of the *Pks1* genes in *M. acridum* and *M. album*. Wrong annotation (the boxed area) of the genomic region (MAA\_05385 in *M. acridum*; MAM\_08215 in *M. album*) corresponding to EthD and PKS1 by NCBI is shown at the bottom; note: a gene containing EthD and PKS1 is annotated from this region. At the top is shown the new annotation of the genomic region corresponding to *EthD* and *Pks1*; note: two genes (*EthD* and *Pks1*) are annotated from this region. PS1, PS2, PS3 and PS4 brackets show the relative positions of the amplified mRNA fragments representing *EthD*, *Pks1*, the fragment spanning *EthD* and *Pks1*, and the region corresponding to N-terminus of the newly annotated *Pks1*, respectively. The “ATG” is the start codon of the newly annotated *Pks1* gene. (B) RT-PCR amplification of the PS1, PS2 and PS3 regions (shown in A) from *M. acridum* and *M. album*. Note: no PCR products were obtained from PS1. (C) RT-PCR amplification of the PS4 region (shown in A) from *M. acridum* (1) and *M. album* (2).
