# Supplementary material for: Duplication of a Pks gene cluster and subsequent functional diversification facilitate environmental adaptation in Metarhizium species
Source: PubMed Central journal article supplement (PMC6042797; doi:10.1371/journal.pgen.1007472), 2018-06-29
Supplement: pgen.1007472.s002.pdf [file pgen.1007472.s002.pdf]

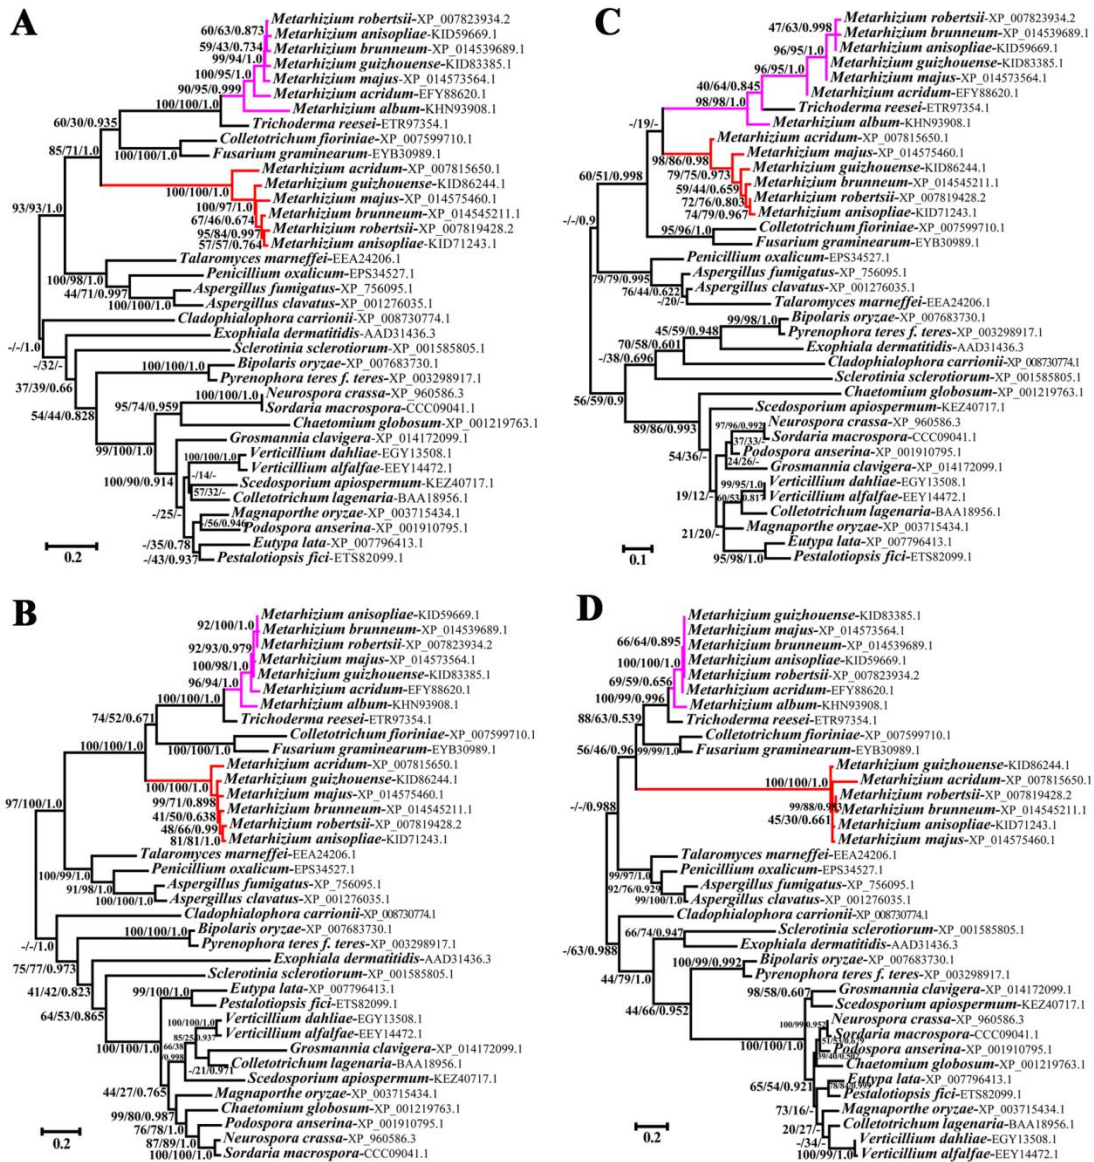

**S2 Fig:** Phylogenetic analysis of domains in the PKSs analyzed in Fig 1. **(A)** AT domain; **(B)** PP-binding domain, **(C)** PS-DH domain, **(D)** TE domain. The Genbank accession number for each full-length amino acid sequence of each PKS is shown after the species name. The clade containing *Metarhizium* PKS1s is highlighted in pink, PKS2s highlighted in red. Numbers at nodes represent the bootstrap values of Maximum Likelihood (left), Neighbor-Joining (middle), and the Bayesian posterior probabilities (right). A hyphen (-) indicates no support value in the corresponding method. The scale bar corresponds to the estimated number of amino acid substitutions per site.
