# Supplementary material for: Duplication of a Pks gene cluster and subsequent functional diversification facilitate environmental adaptation in Metarhizium species
Source: PubMed Central journal article supplement (PMC6042797; doi:10.1371/journal.pgen.1007472), 2018-06-29
Supplement: pgen.1007472.s003.pdf [file pgen.1007472.s003.pdf]

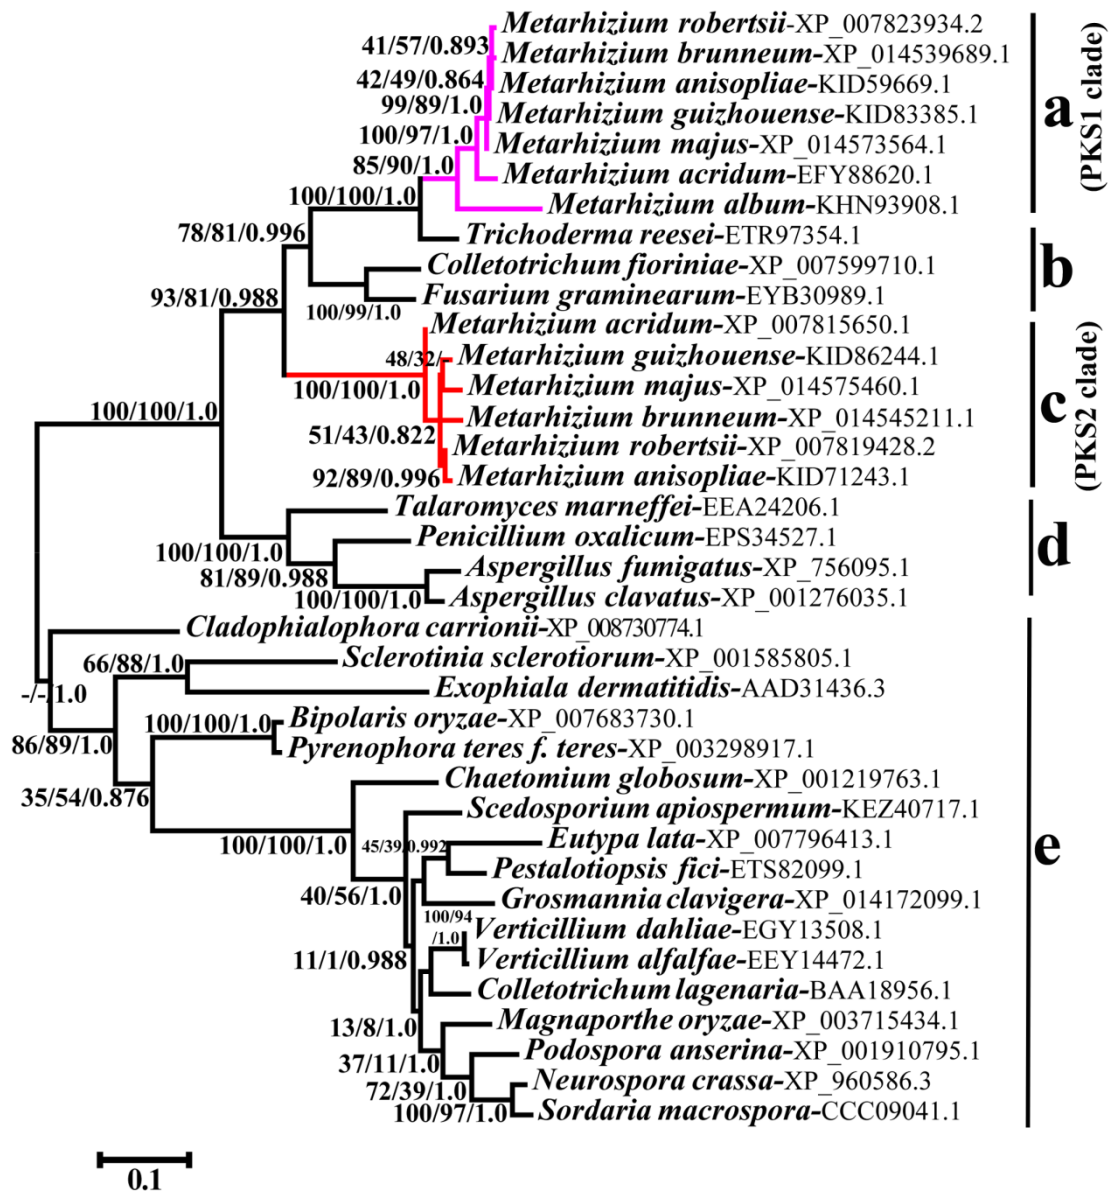

**S3 Fig:** The clades (a to e) assigned for comparison of topologies of alternative (constrained) trees with the obtained tree. Shown is the obtained tree (Fig 1A). The clade *a* in pink is the PKS1 clade, and the clade *c* in red is the PKS2 clade. The results of the topology comparison are shown in S2 Table.
