# Supplementary material for: Duplication of a Pks gene cluster and subsequent functional diversification facilitate environmental adaptation in Metarhizium species
Source: PubMed Central journal article supplement (PMC6042797; doi:10.1371/journal.pgen.1007472), 2018-06-29
Supplement: pgen.1007472.s004.pdf [file pgen.1007472.s004.pdf]

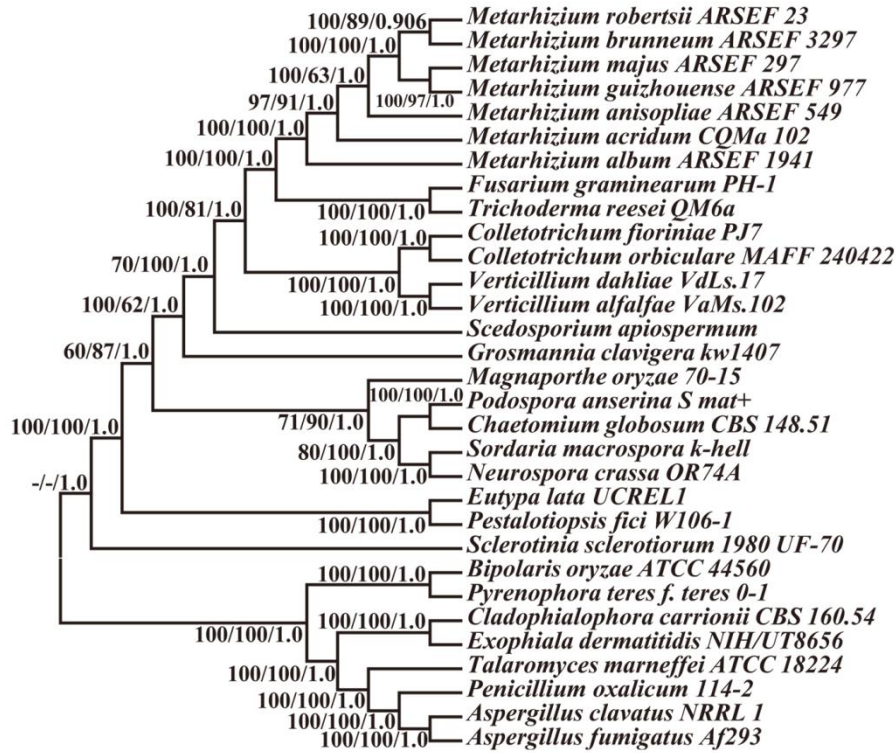

**S4 Fig:** Species tree of the 31 fungal species analyzed in Fig. 1. The species tree was constructed using the concatenated alignment (S2 Dataset) of the 20 best scoring single-copy genes (S7 Table). Numbers at nodes represent the bootstrap values of Maximum Likelihood (left), Neighbor-Joining (middle), and the Bayesian posterior probabilities (right). A hyphen (-) indicates no support value in the corresponding method.
