# Supplementary material for: Duplication of a Pks gene cluster and subsequent functional diversification facilitate environmental adaptation in Metarhizium species
Source: PubMed Central journal article supplement (PMC6042797; doi:10.1371/journal.pgen.1007472), 2018-06-29
Supplement: pgen.1007472.s008.pdf [file pgen.1007472.s008.pdf]

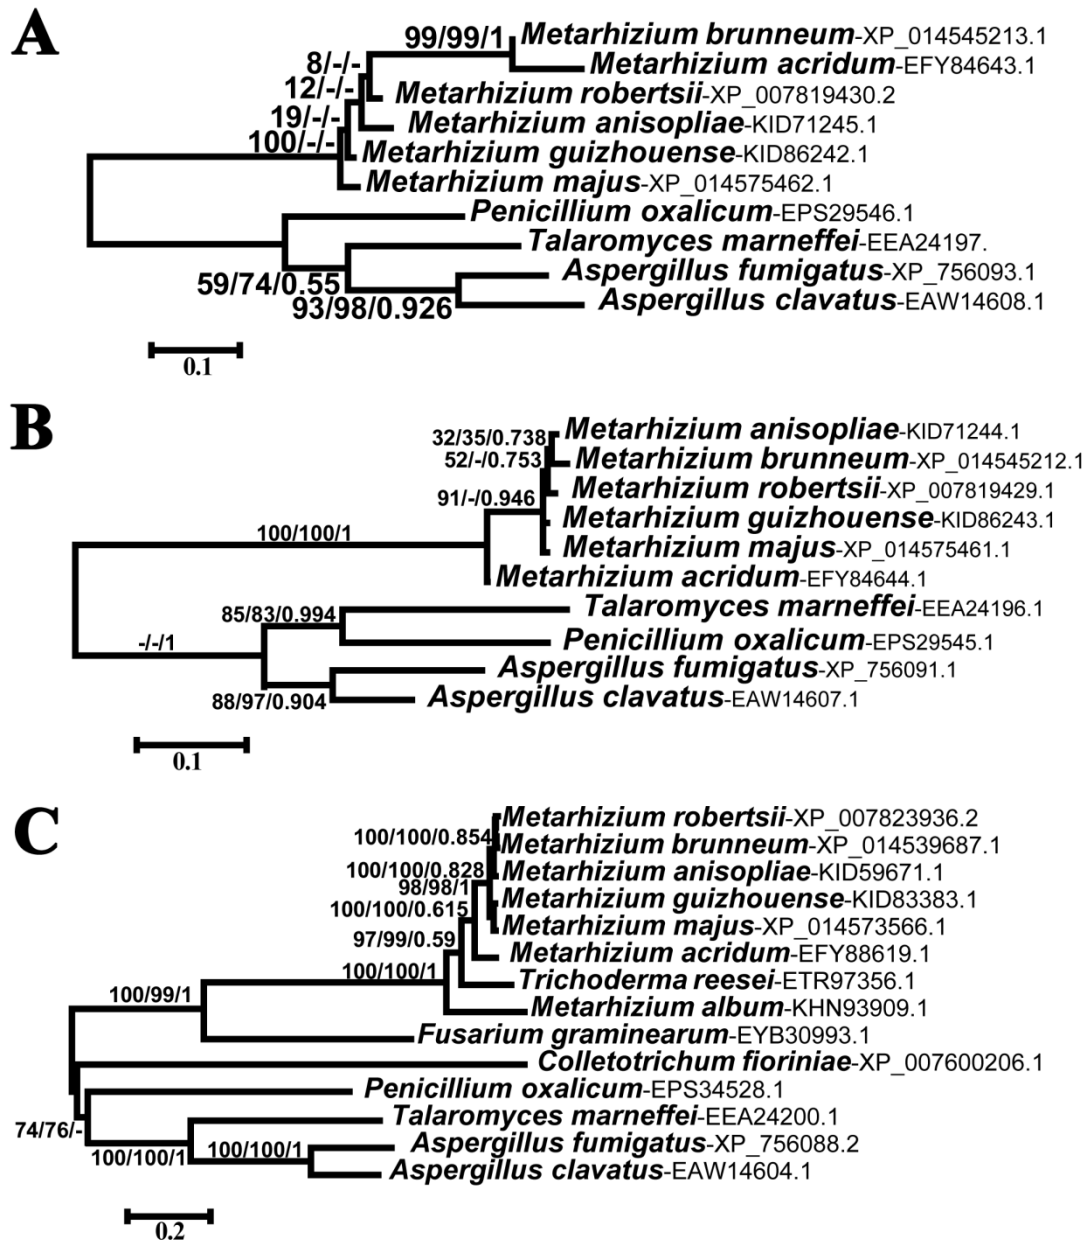

**S8 Fig:** Phylogenetic analyses of Arp1 (A), Arp2 (B) and Abr2 (C) in *Metarhizium* and other fungi that have gene clusters similar to *Pks1-gc* or *Pks2-gc*. Numbers at nodes represent bootstrap values of Maximum Likelihood (left), Neighbor-Joining (middle) and Bayesian posterior probabilities (right). Hyphen (-) indicates no support value in the corresponding method. The scale bar corresponds to the estimated number of amino acid substitutions per site.
