# Supplementary material for: Duplication of a Pks gene cluster and subsequent functional diversification facilitate environmental adaptation in Metarhizium species
Source: PubMed Central journal article supplement (PMC6042797; doi:10.1371/journal.pgen.1007472), 2018-06-29
Supplement: pgen.1007472.s009.pdf [file pgen.1007472.s009.pdf]

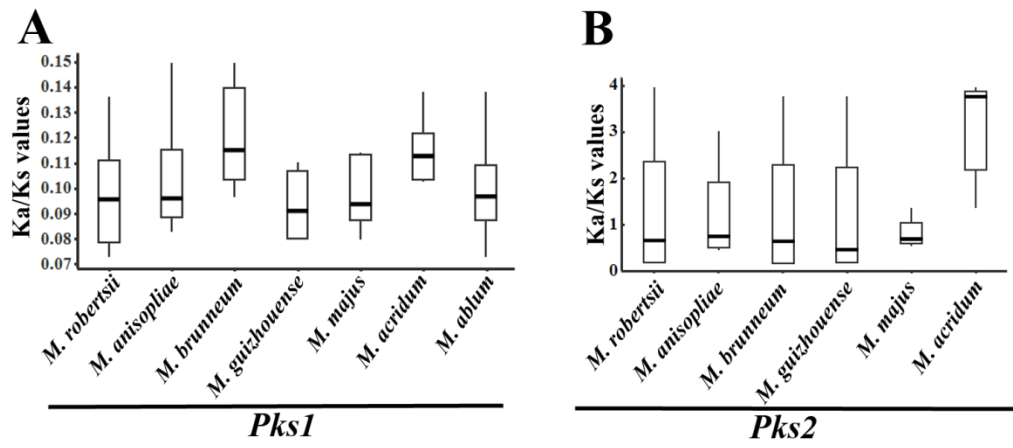

**S9 Fig:** Ka/Ks values of each *Pks1* and *Pks2* gene in *Metarhizium* species. (A) *Pks1*s. (B) *Pks2*s.
