# Supplementary material for: Duplication of a Pks gene cluster and subsequent functional diversification facilitate environmental adaptation in Metarhizium species
Source: PubMed Central journal article supplement (PMC6042797; doi:10.1371/journal.pgen.1007472), 2018-06-29
Supplement: pgen.1007472.s012.pdf [file pgen.1007472.s012.pdf]

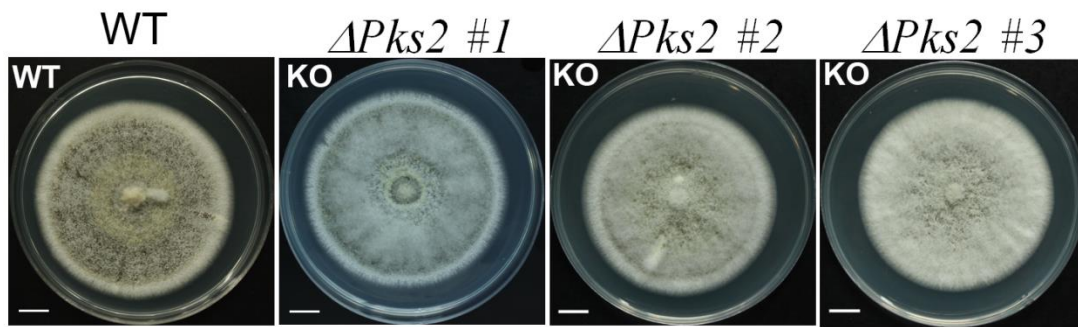

**S12 Fig:** Conidial pigmentation of WT and three independent isolates of the *Pks2* KO (knock out) mutant in *M. robertsii*. Scale bars represent 10 mm. Note: no difference in conidial pigments is seen between the three independent isolates of the mutant and the WT.
