# Supplementary material for: Duplication of a Pks gene cluster and subsequent functional diversification facilitate environmental adaptation in Metarhizium species
Source: PubMed Central journal article supplement (PMC6042797; doi:10.1371/journal.pgen.1007472), 2018-06-29
Supplement: pgen.1007472.s013.pdf [file pgen.1007472.s013.pdf]

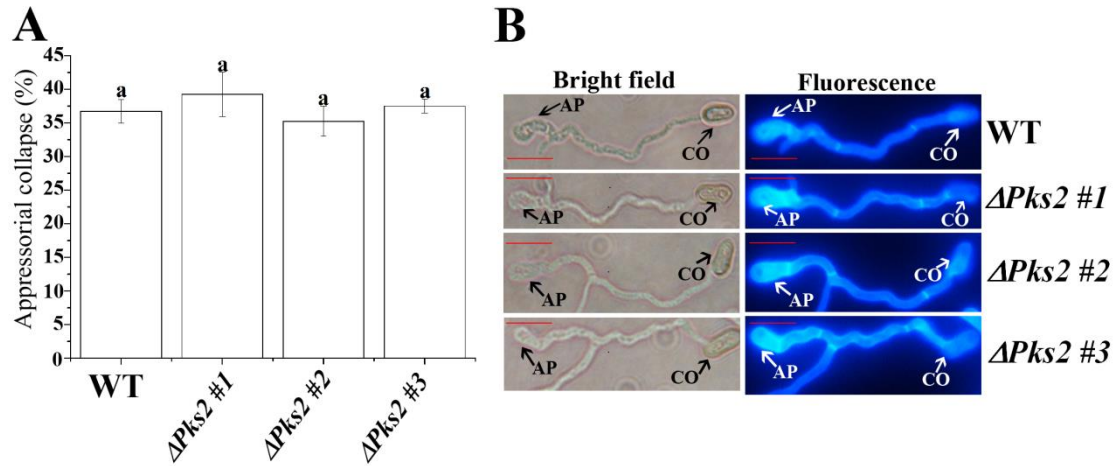

**S13 Fig:** Assays of appressoria of WT (the wild-type strain of *M. robertsii*) and three independent isolates ( $\Delta Pks2$  #1,  $\Delta Pks2$  #2, and  $\Delta Pks2$  #3) of *M. robertsii*'s *Pks2* KO mutant  $\Delta Pks2$ . **(A)** Collapse rates of appressoria in the PEG8000 solution [80% (w/v)]. The assays were repeated three times with three replicates per repeat. Data are expressed as the mean  $\pm$  SE. Values with different letters are significantly different ( $P < 0.05$ , Tukey's test in One-way ANOVA). **(B)** Appressoria (against a hydrophobic plastic surface) stained with Calcofluor Brightener White 2B. AP: appressorium; CO: conidium. Left panel: Bright field microscopy; Right panel: Fluorescence microscopy. Note: no difference in fluorescent intensity between WT and  $\Delta Pks2$ . Images are representative of at least three independent experiments for each condition. Scale bars represent 10 $\mu$ m.
