# Supplementary material for: Duplication of a Pks gene cluster and subsequent functional diversification facilitate environmental adaptation in Metarhizium species
Source: PubMed Central journal article supplement (PMC6042797; doi:10.1371/journal.pgen.1007472), 2018-06-29
Supplement: pgen.1007472.s014.pdf [file pgen.1007472.s014.pdf]

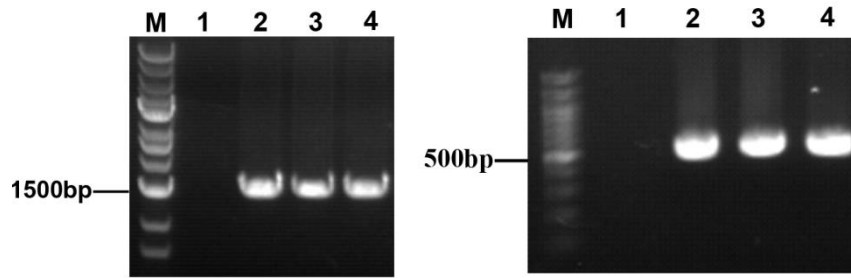

**S14 Fig:** RT-PCR confirmation of expression of *M. robertsii*'s *Pks2* (Left panel) and *Arp1* (Right panel) in *M. album*. M: DNA ladder (Genray, Shanghai); 1: the wild-type *M. album*; 2, 3, 4: three independent *M. album* transformants expressing *M. robertsii*'s *Pks2* and *Arp1*.
