# Supplementary material for: Duplication of a Pks gene cluster and subsequent functional diversification facilitate environmental adaptation in Metarhizium species
Source: PubMed Central journal article supplement (PMC6042797; doi:10.1371/journal.pgen.1007472), 2018-06-29
Supplement: pgen.1007472.s015.pdf [file pgen.1007472.s015.pdf]

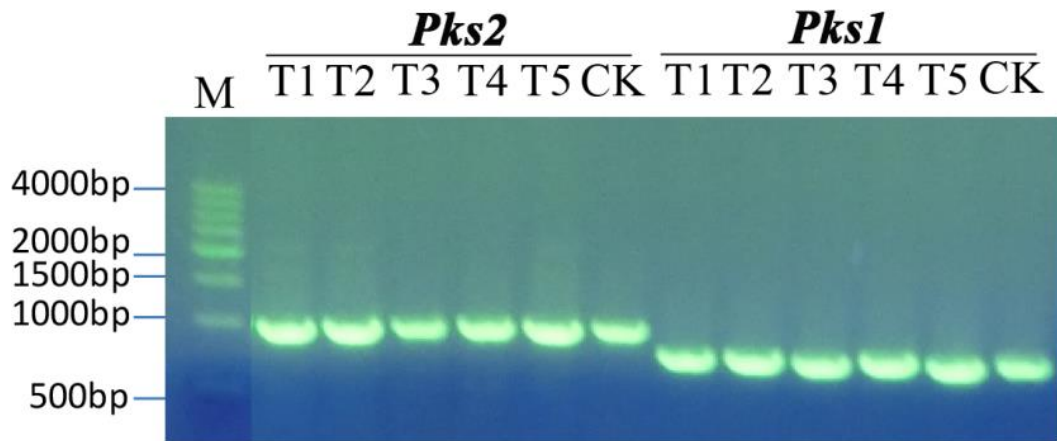

**S15 Fig:** Confirmation of the insertions of *M. robertsii*'s *Pks1* and *Pks2* into the genome of *A. nidulans* strain LO8030. PCR reactions were conducted with primers MAA\_Pks1\_RT\_F/R for *Pks1* and MAA\_Pks2\_RT\_F/R for *Pks2* (see S8 Table for information about the primers). T1 to T5 represents five independent transformants expressing *Pks1* or *Pks2*; CK: the positive control (the DNA template for PCR was *M. robertsii*'s genomic DNA). M: DNA Ladder (Tiangen Biotech, China).
