# Supplementary material for: Duplication of a Pks gene cluster and subsequent functional diversification facilitate environmental adaptation in Metarhizium species
Source: PubMed Central journal article supplement (PMC6042797; doi:10.1371/journal.pgen.1007472), 2018-06-29
Supplement: pgen.1007472.s016.pdf [file pgen.1007472.s016.pdf]

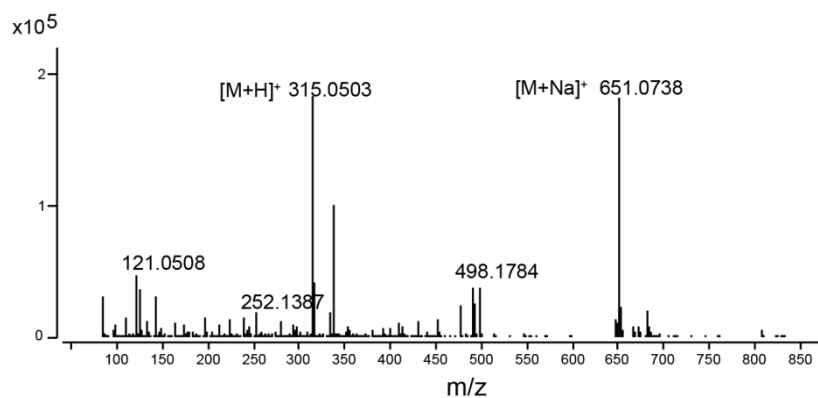

**S16 Fig:** LC-MS analysis of Compound I (shown in Fig 8) from the *A. nidulans* transformant expressing *Pks1*. This figure is supplemental to Fig. 8C. Molecular weight of Compound I was detected by LC-MS analysis at m/z 315 [M+H]<sup>+</sup>, and 651 [M+Na]<sup>+</sup>
