# Supplementary material for: Duplication of a Pks gene cluster and subsequent functional diversification facilitate environmental adaptation in Metarhizium species
Source: PubMed Central journal article supplement (PMC6042797; doi:10.1371/journal.pgen.1007472), 2018-06-29
Supplement: pgen.1007472.s017.pdf [file pgen.1007472.s017.pdf]

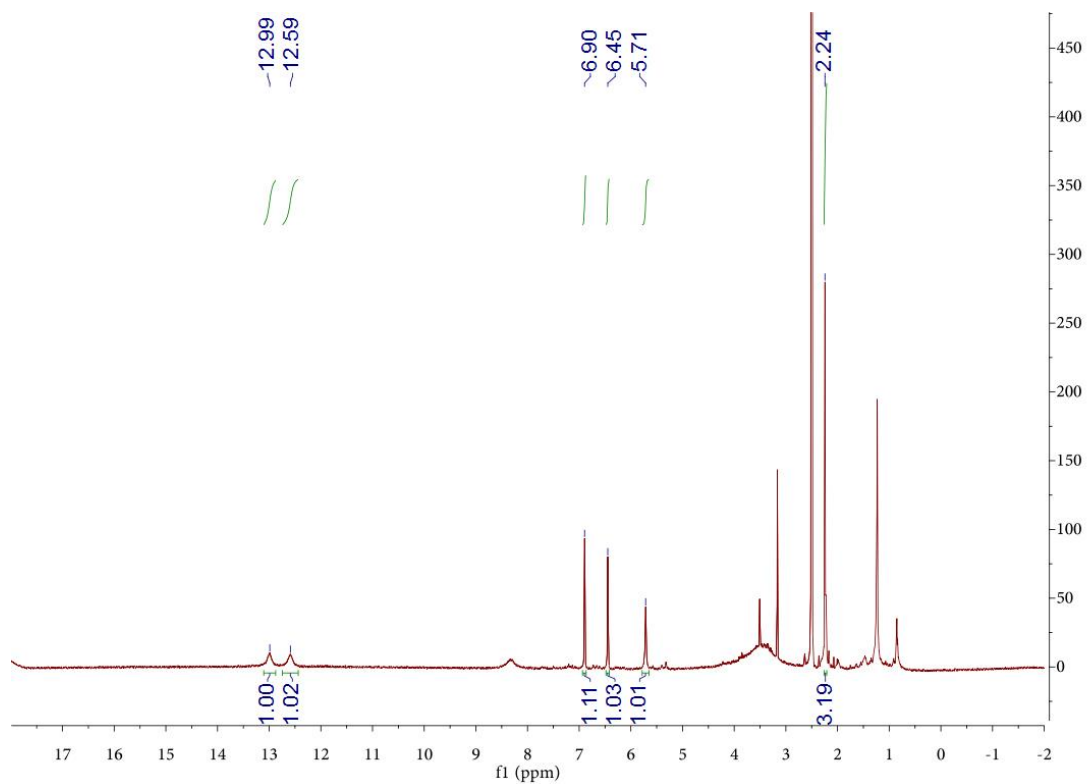

**S17 Fig:**  $^1\text{H}$  NMR spectrum of Compound I (shown in Fig 8) in  $\text{DMSO-}d_6$ .
