# Supplementary material for: Duplication of a Pks gene cluster and subsequent functional diversification facilitate environmental adaptation in Metarhizium species
Source: PubMed Central journal article supplement (PMC6042797; doi:10.1371/journal.pgen.1007472), 2018-06-29
Supplement: pgen.1007472.s019.pdf [file pgen.1007472.s019.pdf]

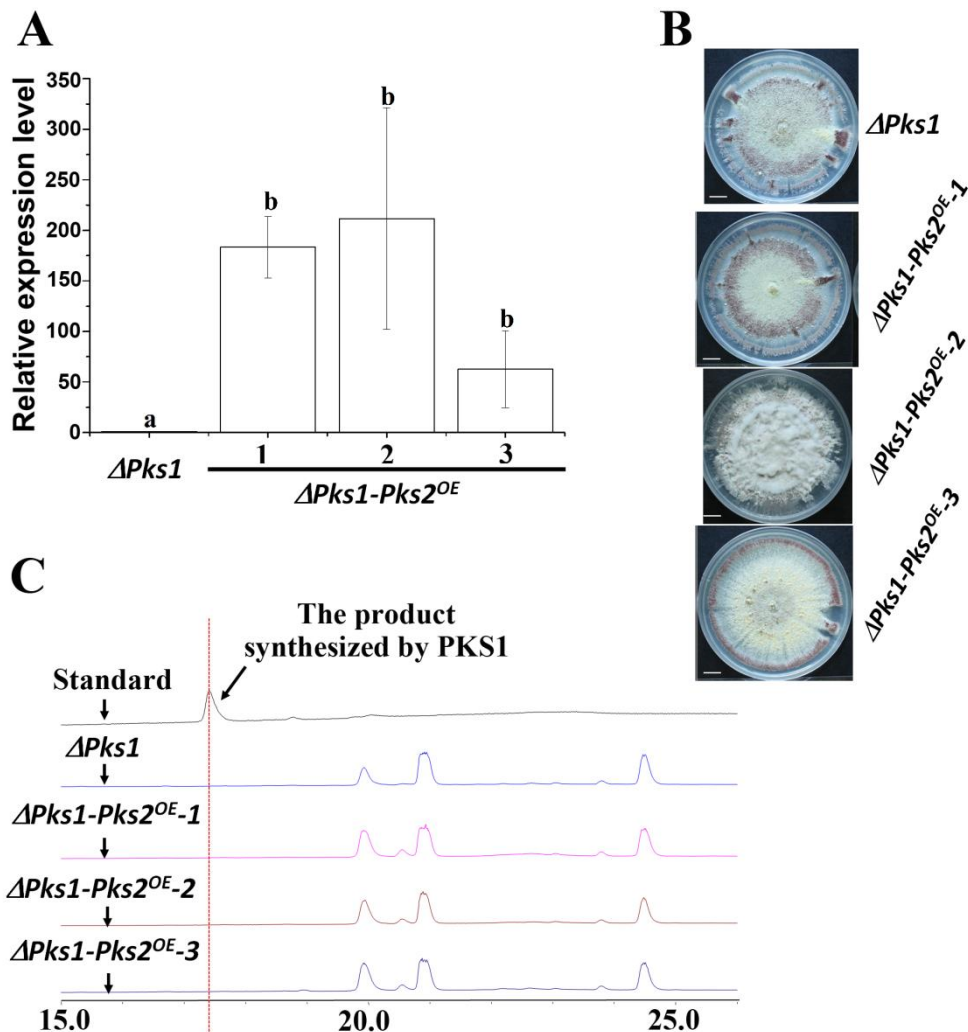

**S19 Fig:** *Pks2* cannot complement the *Pks1* KO mutant ( $\Delta Pks1$ ) in *M. robertsii*. **(A)** qRT-PCR confirmation of overexpression of *Pks2* in  $\Delta Pks1$ .  $\Delta Pks1$ -*Pks2*<sup>OE</sup>:  $\Delta Pks1$  with *Pks2* overexpressed. 1, 2, 3: three independent isolates of  $\Delta Pks1$ -*Pks2*<sup>OE</sup>. The expression level in  $\Delta Pks1$  is set to 1. Values with different letters are significantly different ( $P < 0.05$ , Tukey's test in One-way ANOVA). All assays were repeated three times with three replicates per repeat. **(B)** Colony morphology of  $\Delta Pks1$  and the three independent isolates ( $\Delta Pks1$ -*Pks2*<sup>OE</sup>-1, -2 and -3) of  $\Delta Pks1$ -*Pks2*<sup>OE</sup>. Note: all strains produce red conidia. Pictures were taken 18 days after inoculation of 5  $\mu$ l of conidial suspension ( $4 \times 10^7$  conidia/ml) on a PDA plate. Scale bars represent 10mm. **(C)** HPLC detection of Compound I  $\Delta Pks1$  and the three independent isolates ( $\Delta Pks1$ -*Pks2*<sup>OE</sup>-1, -2 and -3) of  $\Delta Pks1$ -*Pks2*<sup>OE</sup>. Standard: the purified Compound I, indicated by arrow, from the *A. nidulans* transformant TYPZ26.1.
