# Supplementary material for: Duplication of a Pks gene cluster and subsequent functional diversification facilitate environmental adaptation in Metarhizium species
Source: PubMed Central journal article supplement (PMC6042797; doi:10.1371/journal.pgen.1007472), 2018-06-29
Supplement: pgen.1007472.s020.pdf [file pgen.1007472.s020.pdf]

**S1 Table:** Information about proteins and their domain structures used in the analyses conducted in Fig 1.

| Species                           | Protein                  | Accession #    | Domain structure                                                 |
|-----------------------------------|--------------------------|----------------|------------------------------------------------------------------|
| <i>Metarhizium robertsii</i>      | PKS1                     | XP_007823934.2 | PF16073,PF00109,PF02801,PF00698,PF14765,PF00550,PF00975          |
| <i>Metarhizium robertsii</i>      | PKS2                     | XP_007819428.2 | PF16073,PF00109,PF02801,PF00698,PF14765,PF00550,PF00975          |
| <i>Metarhizium anisopliae</i>     | PKS1                     | KID59669.1     | PF16073,PF00109,PF02801,PF00698,PF14765,PF00550,PF00975          |
| <i>Metarhizium anisopliae</i>     | PKS2                     | KID71243.1     | PF16073,PF00109,PF02801,PF00698,PF14765,PF00550,PF00975          |
| <i>Metarhizium brunneum</i>       | PKS1                     | XP_014539689.1 | PF16073,PF00109,PF02801,PF00698,PF14765,PF00550,PF00975          |
| <i>Metarhizium brunneum</i>       | PKS2                     | XP_014545211.1 | PF16073,PF00109,PF02801,PF00698,PF14765,PF00550,PF00975          |
| <i>Metarhizium guizhouense</i>    | PKS1                     | KID83385.1     | PF16073,PF00109,PF02801,PF00698,PF14765,PF00550,PF00975          |
| <i>Metarhizium guizhouense</i>    | PKS2                     | KID86244.1     | PF16073,PF00109,PF02801,PF00698,PF14765,PF00550,PF00975          |
| <i>Metarhizium majus</i>          | PKS1                     | XP_014573564.1 | PF16073,PF00109,PF02801,PF00698,PF14765,PF00550,PF00975          |
| <i>Metarhizium majus</i>          | PKS2                     | XP_014575460.1 | PF16073,PF00109,PF02801,PF00698,PF14765,PF00550,PF00975          |
| <i>Metarhizium acridum</i>        | PKS1                     | MG385100       | PF16073,PF00109,PF02801,PF00698,PF14765,PF00550,PF00975          |
| <i>Metarhizium acridum</i>        | PKS2                     | XP_007815650.1 | PF00109,PF02801,PF00698,PF14765,PF00550,PF00975                  |
| <i>Metarhizium album</i>          | PKS1                     | MG385101       | PF16073,PF00109,PF02801,PF00698,PF14765,PF00550,PF00975          |
| <i>Trichoderma reesei</i>         | Homolog of PKS1 and PKS2 | ETR97354.1     | PF16073,PF00109,PF02801,PF00698,PF14765,PF00550,PF00975          |
| <i>Fusarium graminearum</i>       | Homolog of PKS1 and PKS2 | EYB30989.1     | PF16073,PF00109,PF02801, PF16197,PF00698,PF14765,PF00550,PF00975 |
| <i>Colletotrichum fioriniae</i>   | Homolog of PKS1 and PKS2 | XP_007599710.1 | PF16073,PF00109,PF02801,PF00698,PF14765,PF00550,PF00975          |
| <i>Talaromyces marneffei</i>      | Homolog of PKS1 and PKS2 | EEA24206.1     | PF16073,PF00109,PF02801,PF00698,PF14765,PF00550,PF00975          |
| <i>Penicillium oxalicum</i>       | Homolog of PKS1 and PKS2 | EPS34527.1     | PF16073,PF00109,PF02801,PF00698,PF14765,PF00550,PF00975          |
| <i>Aspergillus fumigatus</i>      | Homolog of PKS1 and PKS2 | XP_756095.1    | PF16073,PF00109,PF02801,PF00698,PF14765,PF00550,PF00975          |
| <i>Aspergillus clavatus</i>       | Homolog of PKS1 and PKS2 | XP_001276035.1 | PF16073,PF00109,PF02801,PF00698,PF14765,PF00550,PF00975          |
| <i>Cladophialophora carrionii</i> | Homolog of PKS1 and PKS2 | XP_008730774.1 | PF16073,PF00109,PF02801,PF00698,PF14765,PF00550,PF00975          |
| <i>Bipolaris oryzae</i>           | Homolog of PKS1 and PKS2 | XP_007683730.1 | PF16073,PF00109,PF02801, PF16197,PF00698,PF14765,PF00550,PF00975 |
| <i>Pyrenophora teres f.teres</i>  | Homolog of PKS1 and PKS2 | XP_003298917.1 | PF16073,PF00109,PF02801, PF16197,PF00698,PF14765,PF00550,PF00975 |
| <i>Sclerotinia sclerotiorum</i>   | Homolog of PKS1 and PKS2 | XP_001585805.1 | PF16073,PF00109,PF02801,PF00698,PF14765,PF00550,PF00975          |
| <i>Chaetomium globosum</i>        | Homolog of PKS1 and PKS2 | XP_001219763.1 | PF16073,PF00109,PF02801,PF00698,PF14765,PF00550,PF00975          |
| <i>Neurospora crassa</i>          | Homolog of PKS1 and PKS2 | XP_960586.3    | PF16073,PF00109,PF02801,PF00698,PF14765,PF00550,PF00975          |
| <i>Sordaria macrospora</i>        | Homolog of PKS1 and PKS2 | CCC09041.1     | PF16073,PF00109,PF02801,PF00698,PF14765,PF00550,PF00975          |
| <i>Podospora anserine</i>         | Homolog of PKS1 and PKS2 | XP_001910795.1 | PF16073,PF00109,PF02801,PF00698,PF14765,PF00550,PF00975          |
| <i>Magnaporthe oryzae</i>         | Homolog of PKS1 and PKS2 | XP_003715434.1 | PF16073,PF00109,PF02801,PF00698,PF14765,PF00550,PF00975          |
| <i>Grossmannia clavigera</i>      | Homolog of PKS1 and PKS2 | XP_014172099.1 | PF16073,PF00109,PF02801,PF00698,PF14765,PF00550,PF00975          |
| <i>Eutypa lata</i>                | Homolog of PKS1 and PKS2 | XP-007796413.1 | PF00109,PF02801,PF00698,PF14765,PF00550,PF00975                  |
| <i>Scedosporium apiospermum</i>   | Homolog of PKS1 and PKS2 | KEZ40717.1     | PF16073,PF00109,PF02801,PF00698,PF14765,PF00550,PF00975          |
| <i>Verticillium dahliae</i>       | Homolog of PKS1 and PKS2 | EGY13508.1     | PF16073,PF00109,PF02801,PF00698,PF14765,PF00550,PF00975          |
| <i>Verticillium alfalfae</i>      | Homolog of PKS1 and PKS2 | EEY14472.1     | PF16073,PF00109,PF02801,PF00698,PF14765,PF00550,PF00975          |
| <i>Pestalotiopsis fici</i>        | Homolog of PKS1 and PKS2 | ETS82099.1     | PF16073,PF00109,PF02801,PF00698,PF14765,PF00550,PF00975          |
| <i>Exophiala dermatitidis</i>     | Homolog of PKS1 and PKS2 | AAD31436.3     | PF16073,PF00109,PF02801,PF00698,PF14765,PF00550,PF00975          |
| <i>Colletotrichum lagenaria</i>   | Homolog of PKS1 and PKS2 | BAA18956.1     | PF16073,PF00109,PF02801,PF00698,PF14765,PF00550,PF00975          |

Notes: PF16073 (SAT: starter unit acyltransferase), PF00109 (KS-N: N-terminus of  $\beta$ -ketoacyl synthase), PF02801 (KS-C: N-terminus of  $\beta$ -ketoacyl synthase), PF16197 (KA-C: ketoacyl-synthetase C-terminal extension), PF00698 (AT: acyltransferase), PF14765 (PS-DH: polyketide synthase dehydratase), PF00550 (PP-binding: Phosphopantetheine attachment site), PF00975 (TE: thioesterase).
