# Supplementary material for: Duplication of a Pks gene cluster and subsequent functional diversification facilitate environmental adaptation in Metarhizium species
Source: PubMed Central journal article supplement (PMC6042797; doi:10.1371/journal.pgen.1007472), 2018-06-29
Supplement: pgen.1007472.s021.pdf [file pgen.1007472.s021.pdf]

**S2 Table:** Statistics of comparison of topologies of the constrained trees (S3 Fig) with the obtained tree (Fig 1)

| Scenarios         | au           | np           | bp           | pp           | kh           | sh           | wkh          | wsh          |
|-------------------|--------------|--------------|--------------|--------------|--------------|--------------|--------------|--------------|
| (((a,b),c),d),e)* | <b>1.000</b> | <b>1.000</b> | <b>1.000</b> | <b>1.000</b> | <b>0.999</b> | <b>1.000</b> | <b>0.999</b> | <b>1.000</b> |
| (((a,b),(c,d)),e) | <b>1e-08</b> | 5e-07        | 0            | 2e-48        | 9e-05        | 9e-05        | 9e-05        | 4e-04        |
| (((a,c),b),d),e)  | <b>0.001</b> | 3e-04        | 2e-04        | 3e-35        | 0.001        | 0.001        | 0.001        | 0.002        |
| (((a,d),b),c),e)  | <b>4e-04</b> | 1e-04        | 1e-04        | 2e-38        | 0.001        | 0.001        | 0.001        | 0.001        |

**Note:** The tree was constructed with the amino acid sequences of KS domains in PKSs. Clades (a to e) are shown in S3 Fig. The value of site-wise likelihood of every constrained topology was calculated by PhyML. Hypothesis testing was implemented with CONSEL. All tests consistently showed the alternative (constrained) trees are statistically ( $P < 0.05$ ) rejected. \*: the obtained tree.
