# Supplementary material for: Duplication of a Pks gene cluster and subsequent functional diversification facilitate environmental adaptation in Metarhizium species
Source: PubMed Central journal article supplement (PMC6042797; doi:10.1371/journal.pgen.1007472), 2018-06-29
Supplement: pgen.1007472.s022.pdf [file pgen.1007472.s022.pdf]

**S3 Table:** GT<sub>50</sub> (Time taken for 50% of conidia to germinate) values of three independent isolates of a *Pks1* mutant in seven *Metarhizium* species and their respective wild-type strains (WT) under optimal conditions (grown at 26°C in 1/2 SDY). Within each row (species), values appended by different letters are significantly different ( $P < 0.05$ , Tukey's test in One-way ANOVA). All assays were repeated three times with three replicates per repeat.

| Species               | GT <sub>50</sub> (hours) |                          |                          |                          |
|-----------------------|--------------------------|--------------------------|--------------------------|--------------------------|
|                       | WT                       | $\Delta Pks1\text{-}\#1$ | $\Delta Pks1\text{-}\#2$ | $\Delta Pks1\text{-}\#3$ |
| <i>M. robertsii</i>   | 6.74±0.12 <sup>a</sup>   | 5.00±0.22 <sup>b</sup>   | 5.23±0.14 <sup>b</sup>   | 5.58±0.10 <sup>b</sup>   |
| <i>M. anisopliae</i>  | 7.95±0.12 <sup>a</sup>   | 8.21±0.14 <sup>a</sup>   | 8.62±0.31 <sup>a</sup>   | 8.03±0.51 <sup>a</sup>   |
| <i>M. brunneum</i>    | 7.36±0.18 <sup>a</sup>   | 7.56±0.22 <sup>a</sup>   | 8.20±0.10 <sup>a</sup>   | 8.26±0.06 <sup>a</sup>   |
| <i>M. guizhouense</i> | 8.98±0.32 <sup>a</sup>   | 9.53±0.27 <sup>a</sup>   | 9.32±0.23 <sup>a</sup>   | 9.30±0.24 <sup>a</sup>   |
| <i>M. majus</i>       | 12.61±0.33 <sup>a</sup>  | 8.14±0.43 <sup>b</sup>   | 7.71±1.0 <sup>b</sup>    | 8.51±0.65 <sup>b</sup>   |
| <i>M. acridum</i>     | 13.7±0.13 <sup>a</sup>   | 14.93±0.29 <sup>b</sup>  | 14.81±0.18 <sup>b</sup>  | 14.85±0.18 <sup>b</sup>  |
| <i>M. album</i>       | 9.08±0.16 <sup>a</sup>   | 7.47±0.34 <sup>b</sup>   | 7.71±0.17 <sup>b</sup>   | 8.13±0.07 <sup>b</sup>   |
