# Supplementary material for: Duplication of a Pks gene cluster and subsequent functional diversification facilitate environmental adaptation in Metarhizium species
Source: PubMed Central journal article supplement (PMC6042797; doi:10.1371/journal.pgen.1007472), 2018-06-29
Supplement: pgen.1007472.s023.pdf [file pgen.1007472.s023.pdf]

**S4 Table:** Relative germination rates of two of three independent isolates (#2 and #3) of a *Pks1* mutant in seven *Metarhizium* species under three abiotic stresses. All assays were repeated three times with three replicates per repeat.

|                       | UV radiation             |                          | Heat stress              |                          | Cold stress              |                          |
|-----------------------|--------------------------|--------------------------|--------------------------|--------------------------|--------------------------|--------------------------|
|                       | $\Delta Pks1\text{-\#}2$ | $\Delta Pks1\text{-\#}3$ | $\Delta Pks1\text{-\#}2$ | $\Delta Pks1\text{-\#}3$ | $\Delta Pks1\text{-\#}2$ | $\Delta Pks1\text{-\#}3$ |
| <i>M. robertsii</i>   | Ref17 <sup>1</sup>       | Ref17 <sup>1</sup>       | 0.66±0.004               | 0.61±0.007               | 2.60±0.07                | 2.60±0.06                |
| <i>M. anisopliae</i>  | 0.35±0.05                | 0.40±0.02                | 0.52±0.11                | 0.64±0.13                | 3.17±0.02                | 3.21±0.007               |
| <i>M. brunneum</i>    | 0.57±0.02                | 0.44±0.02                | 1.40±0.05                | 1.23±0.19                | 1.77±0.37                | 1.78±0.18                |
| <i>M. guizhouense</i> | 0.43±0.02                | 0.48±0.01                | 1.72±0.16                | 1.78±0.17                | 2.96±0.17                | 2.98±0.18                |
| <i>M. majus</i>       | 0.13±0.02                | 0.14±0.14                | 2.27±1.39                | 2.83±1.26                | 1.75±0.07                | 1.72±0.08                |
| <i>M. acridum</i>     | 0.54±0.04                | 0.59±0.003               | 0.13±0.01                | 0.11±0.02                | 2.41±0.07                | 2.46±0.07                |
| <i>M. album</i>       | 0.31±0.03                | 0.27±0.004               | 4.59±0.2                 | 4.37±0.11                | 3.09±0.21                | 2.79±0.02                |

Note:

1: data have been published in reference 17 in the main text.

2: The numerical values: the relative germination inhibition of a given stressor on each strain was calculated as  $(G_c - G_t) / G_c$ , where  $G_c$  and  $G_t$  denote the  $GT_{50}$  (Time taken for 50% of conidia to germinate) of the stressed and unstressed conidia, respectively.

3: The data about the WT and  $\Delta Pks1\text{-\#}1$  are presented in Table 1.
