# Supplementary material for: Duplication of a Pks gene cluster and subsequent functional diversification facilitate environmental adaptation in Metarhizium species
Source: PubMed Central journal article supplement (PMC6042797; doi:10.1371/journal.pgen.1007472), 2018-06-29
Supplement: pgen.1007472.s024.pdf [file pgen.1007472.s024.pdf]

**S5 Table:** Relative germination rates of three independent isolates of the *M. robertsii* *Pks2* KO mutant under three abiotic stresses. All assays were repeated three times with three replicates per repeat. Within each row (strains), values appended by different letters are significantly different ( $P < 0.05$ , Tukey's test in One-way ANOVA).

|              | Strains                      |                              |                              |                              |
|--------------|------------------------------|------------------------------|------------------------------|------------------------------|
|              | WT                           | $\Delta Pks2\text{-}\#1$     | $\Delta Pks2\text{-}\#2$     | $\Delta Pks2\text{-}\#3$     |
| UV radiation | 0.26 $\pm$ 0.05 <sup>a</sup> | 0.25 $\pm$ 0.06 <sup>a</sup> | 0.28 $\pm$ 0.03 <sup>a</sup> | 0.32 $\pm$ 0.03 <sup>a</sup> |
| Heat stress  | 0.47 $\pm$ 0.03 <sup>a</sup> | 0.47 $\pm$ 0.12 <sup>a</sup> | 0.45 $\pm$ 0.08 <sup>a</sup> | 0.48 $\pm$ 0.10 <sup>a</sup> |
| Cold stress  | 2.16 $\pm$ 0.15 <sup>a</sup> | 2.62 $\pm$ 0.14 <sup>a</sup> | 2.89 $\pm$ 0.34 <sup>a</sup> | 2.47 $\pm$ 0.27 <sup>a</sup> |

Note:

The numerical values: the relative germination inhibition of a given stressor on each strain was calculated as  $(G_c - G_t) / G_c$ , where  $G_c$  and  $G_t$  denote the  $GT_{50}$  (Time taken for 50% of conidia to germinate) of the stressed and unstressed conidia, respectively.
