# Supplementary material for: Duplication of a Pks gene cluster and subsequent functional diversification facilitate environmental adaptation in Metarhizium species
Source: PubMed Central journal article supplement (PMC6042797; doi:10.1371/journal.pgen.1007472), 2018-06-29
Supplement: pgen.1007472.s025.pdf [file pgen.1007472.s025.pdf]

**S6 Table:** NMR spectroscopic data for Compound I (1-acetyl-2,4,6,8-tetrahydroxy-9,10-anthraquinone) in DMSO-*d*<sub>6</sub>

| Pos  | Compound I                            |                             |
|------|---------------------------------------|-----------------------------|
|      | $\delta_{\text{H}}$ ( <i>J</i> in Hz) | $\delta_{\text{C}}$ , mult. |
| 1    |                                       | 134.6                       |
| 2    |                                       | 165.8                       |
| 3    | 5.71, s                               | 108.1                       |
| 4    |                                       | 165.8                       |
| 4a   |                                       | 103.5                       |
| 5    | 6.90, s                               | 108.7                       |
| 6    |                                       | 163.5                       |
| 7    | 6.45, s                               | 108.2                       |
| 8    |                                       | 163.5                       |
| 8a   |                                       | 134.6                       |
| 9    |                                       | 184.7                       |
| 9a   |                                       | 129.3                       |
| 10   |                                       | 183.2                       |
| 10a  |                                       | 109.4                       |
| 1-Ac |                                       | 205.5                       |
|      | 2.24, s                               | 31.1                        |
| 4-OH | 13.0, br s                            |                             |
| 8-OH | 12.6, br s                            |                             |
