# Supplementary material for: Duplication of a Pks gene cluster and subsequent functional diversification facilitate environmental adaptation in Metarhizium species
Source: PubMed Central journal article supplement (PMC6042797; doi:10.1371/journal.pgen.1007472), 2018-06-29
Supplement: pgen.1007472.s026.pdf [file pgen.1007472.s026.pdf]

**S7 Table:** Plasmids and fungal strains used in this study.

| Plasmids/Strains                               | Description                                                                                                                                                                                                                                                                                                                                                                                                                                                                                                                                                                                                                                                            | Reference             |
|------------------------------------------------|------------------------------------------------------------------------------------------------------------------------------------------------------------------------------------------------------------------------------------------------------------------------------------------------------------------------------------------------------------------------------------------------------------------------------------------------------------------------------------------------------------------------------------------------------------------------------------------------------------------------------------------------------------------------|-----------------------|
| <b>Plasmids</b>                                |                                                                                                                                                                                                                                                                                                                                                                                                                                                                                                                                                                                                                                                                        |                       |
| Ppk2-OSCAR-GFP                                 | Plasmid for construction of gene disruption plasmid                                                                                                                                                                                                                                                                                                                                                                                                                                                                                                                                                                                                                    | Xu et al., 2014       |
| pA-Bar                                         | Plasmid for construction of gene disruption plasmid                                                                                                                                                                                                                                                                                                                                                                                                                                                                                                                                                                                                                    | Xu et al., 2014       |
| pPK2-Ptef                                      | For expression of <i>Pks1</i> of <i>M. robertsii</i> in <i>M. album</i>                                                                                                                                                                                                                                                                                                                                                                                                                                                                                                                                                                                                | Guo et al., 2017      |
| pYH-WA-pyrG                                    | <i>URA3</i> , <i>WA flanking</i> , <i>AfpyrG</i> , <i>Amp</i>                                                                                                                                                                                                                                                                                                                                                                                                                                                                                                                                                                                                          | Yin et al., 2013      |
| pYH-WA-pyrG-gpdA                               | <i>URA3</i> , <i>WA flanking</i> , <i>Afribo</i> , <i>Amp</i> , <i>gpdA</i>                                                                                                                                                                                                                                                                                                                                                                                                                                                                                                                                                                                            | This study            |
| pYPZ56.1                                       | <i>gpdA(p)::Pks1</i> in pYH-WA-pyrG-gpdA                                                                                                                                                                                                                                                                                                                                                                                                                                                                                                                                                                                                                               | This study            |
| <b>Metarhizium strains</b>                     |                                                                                                                                                                                                                                                                                                                                                                                                                                                                                                                                                                                                                                                                        |                       |
| <i>Metarhizium robertsii</i>                   | ARSEF2575, a generalist                                                                                                                                                                                                                                                                                                                                                                                                                                                                                                                                                                                                                                                | He et al., 2014       |
| <i>Metarhizium anisopliae</i>                  | ARSEF549, a generalist                                                                                                                                                                                                                                                                                                                                                                                                                                                                                                                                                                                                                                                 | He et al., 2014       |
| <i>Metarhizium brunneum</i>                    | ARSEF3297, a generalist                                                                                                                                                                                                                                                                                                                                                                                                                                                                                                                                                                                                                                                | He et al., 2014       |
| <i>Metarhizium guizhouense</i>                 | ARSEF977, a species with an intermediate host range                                                                                                                                                                                                                                                                                                                                                                                                                                                                                                                                                                                                                    | He et al., 2014       |
| <i>Metarhizium majus</i>                       | ARSEF297, a species with an intermediate host range                                                                                                                                                                                                                                                                                                                                                                                                                                                                                                                                                                                                                    | He et al., 2014       |
| <i>Metarhizium acridum</i>                     | ARSEF324, a specialist                                                                                                                                                                                                                                                                                                                                                                                                                                                                                                                                                                                                                                                 | He et al., 2014       |
| <i>Metarhizium album</i>                       | ARSEF1941, a specialist                                                                                                                                                                                                                                                                                                                                                                                                                                                                                                                                                                                                                                                | He et al., 2014       |
| $\Delta$ Mero-Hog1                             | The deletion mutant of <i>Hog1-MAPK</i> in <i>M. robertsii</i>                                                                                                                                                                                                                                                                                                                                                                                                                                                                                                                                                                                                         | Chen et al., 2016     |
| $\Delta$ Mero-Fus3                             | The deletion mutant of <i>Fus3-MAPK</i> in <i>M. robertsii</i>                                                                                                                                                                                                                                                                                                                                                                                                                                                                                                                                                                                                         | Chen et al., 2016     |
| $\Delta$ Mero-Slt2                             | The deletion mutant of <i>Slt2-MAPK</i> in <i>M. robertsii</i>                                                                                                                                                                                                                                                                                                                                                                                                                                                                                                                                                                                                         | Chen et al., 2016     |
| $\Delta$ Mr-OPY2                               | The deletion mutant of <i>Mr-OPY2</i> in <i>M. robertsii</i>                                                                                                                                                                                                                                                                                                                                                                                                                                                                                                                                                                                                           | Guo et al., 2017      |
| <b>Aspergillus nidulans background strains</b> |                                                                                                                                                                                                                                                                                                                                                                                                                                                                                                                                                                                                                                                                        |                       |
| LO8030                                         | <i>pyroA4</i> , <i>riboB2</i> , <i>pyrG89</i> , <i>nkuA::argB</i> , <i>sterigmatocystin cluster</i> ( <i>AN7804-AN7825</i> ) $\Delta$ , <i>emericellamide cluster</i> ( <i>AN2545-AN2549</i> ) $\Delta$ , <i>asperfuranone cluster</i> ( <i>AN1039-AN1029</i> ) $\Delta$ , <i>monodictyphenone cluster</i> ( <i>AN10023-AN10021</i> ) $\Delta$ , <i>terrequinone cluster</i> ( <i>AN8512-8520</i> ) $\Delta$ , <i>austinol cluster part 1</i> ( <i>AN8379-AN8384</i> ) $\Delta$ , <i>austinol cluster part 2</i> ( <i>AN9246-9259</i> ) $\Delta$ , <i>F9775 cluster</i> ( <i>AN7906-7915</i> ) $\Delta$ , <i>asperthecin cluster</i> ( <i>AN6000-AN6002</i> ) $\Delta$ | (Chiang et al., 2016) |
| TYPZ26.1                                       | <i>gpdA::Pks1::AfpyrG</i> in LO8030                                                                                                                                                                                                                                                                                                                                                                                                                                                                                                                                                                                                                                    | This study            |
