# Supplementary material for: Duplication of a Pks gene cluster and subsequent functional diversification facilitate environmental adaptation in Metarhizium species
Source: PubMed Central journal article supplement (PMC6042797; doi:10.1371/journal.pgen.1007472), 2018-06-29
Supplement: pgen.1007472.s027.pdf [file pgen.1007472.s027.pdf]

**S8 Table:** Genbank accession numbers of the 20 genes in the 31 fungal species shown in Fig. 1A for constructing a species phylogenetic tree (shown in S4 Fig).

| Species                           | <i>Cct8p</i>   | <i>Elp3p</i>   | <i>Erb1p</i>   | <i>Gdh2p</i>   | <i>Hsh49p</i>  | <i>Icp55p</i>  | <i>Ils1p</i>   |
|-----------------------------------|----------------|----------------|----------------|----------------|----------------|----------------|----------------|
| <i>Metarhizium robertsii</i>      | XP_007822063.1 | XP_007821021.1 | XP_007816448.1 | XP_007818669.2 | XP_007824065.1 | XP_007818259.1 | XP_007818881.1 |
| <i>Metarhizium anisopliae</i>     | KID67533.1     | KID60893.1     | KID59995.1     | KID62296.1     | KID65694.1     | KID64927.1     | KID69430.1     |
| <i>Metarhizium brunneum</i>       | XP_014549116.1 | XP_014544685.1 | XP_014543849.1 | XP_014547521.1 | XP_014542099.1 | XP_014547075.1 | XP_014545775.1 |
| <i>Metarhizium majus</i>          | KIE02969.1     | KID97773.1     | KID99460.1     | KIE01579.1     | KID99324.1     | KIE03738.1     | KIE02509.1     |
| <i>Metarhizium guizhouense</i>    | KID92455.1     | KID88272.1     | KID86369.1     | KID92608.1     | KID92893.1     | KID93054.1     | KID88763.1     |
| <i>Metarhizium acridum</i>        | XP_007810047.1 | XP_007808318.1 | XP_007815421.1 | XP_007807988.1 | XP_007812258.1 | XP_007809077.1 | XP_007815088.1 |
| <i>Metarhizium album</i>          | KHN99445.1     | KHN97240.1     | KHN98601.1     | KHO01177.1     | KHO01537.1     | KHN99095.1     | KHN99270.1     |
| <i>Colletotrichum fioriniae</i>   | EXF78020.1     | EXF77681.1     | EXF84209.1     | EXF80548.1     | EXF85243.1     | EXF74986.1     | EXF84702.1     |
| <i>Penicillium oxalicum</i>       | EPS27502.1     | EPS34317.1     | EPS31825.1     | EPS31216.1     | EPS26069.1     | EPS26069.1     | EPS25287.1     |
| <i>Cladophialophora carrionii</i> | XP_008722627.1 | XP_008721689.1 | XP_008722236.1 | XP_008731725.1 | XP_008727797.1 | XP_008727797.1 | XP_008724927.1 |
| <i>Bipolaris oryzae</i>           | XP_007691475.1 | XP_007684404.1 | XP_007685934.1 | XP_007685468.1 | XP_007690870.1 | XP_007683359.1 | XP_007690027.1 |
| <i>Podospora anserina</i>         | XP_001908077.1 | XP_001911227.1 | XP_001908629.1 | XP_007685468.1 | XP_001911901.1 | XP_001911901.1 | XP_001909927.1 |
| <i>Eutypa lata</i>                | EMR61440.1     | EMR63632.1     | EMR68950.1     | EMR69848.1     | EMR71274.1     | EMR66373.1     | EMR64187.1     |
| <i>Pestalotiopsis fici</i>        | XP_007839431.1 | XP_007837762.1 | XP_007827689.1 | XP_007832371.1 | XP_007834982.1 | XP_007836604.1 | XP_007835797.1 |
| <i>Scedosporium apiospermum</i>   | XP_016642474.1 | XP_016646421.1 | XP_016644122.1 | XP_016645106.1 | XP_016639467.1 | XP_016639467.1 | XP_016643197.1 |
| <i>Colletotrichum orbiculare</i>  | ENH77904.1     | ENH79595.1     | ENH78230.1     | ENH86491.1     | ENH78714.1     | ENH84068.1     | ENH87515.1     |
| <i>Sclerotinia sclerotiorum</i>   | XP_001589935.1 | XP_001592077.1 | APA14678.1     | APA08274.1     | APA15410.1     | XP_001596060.1 | APA15569.1     |
| <i>Grossmannia clavigera</i>      | XP_014169118.1 | XP_014170080.1 | XP_014169301.1 | XP_014172124.1 | XP_014169262.1 | XP_014171002.1 | XP_014168829.1 |
| <i>Magnaporthe oryzae</i>         | XP_003718996.1 | XP_003710346.1 | XP_003709965.1 | XP_003712804.1 | XP_003719883.1 | XP_003718443.1 | XP_003716759.1 |
| <i>Sordaria macrospora</i>        | XP_003348967.1 | XP_003348083.1 | XP_003345367.1 | XP_003348872.1 | XP_003343751.1 | XP_003349164.1 | XP_003352371.1 |
| <i>Neurospora crassa</i>          | XP_958612.1    | XP_961595.1    | XP_964498.1    | XP_956780.2    | XP_011394630.1 | XP_957892.2    | XP_956014.1    |
| <i>Chaetomium globosum</i>        | XP_001229690.1 | XP_001225084.1 | XP_001220815.1 | XP_001229575.1 | XP_001224820.1 | XP_001227014.1 | XP_001225907.1 |
| <i>Verticillium dahliae</i>       | XP_009658230.1 | XP_009652650.1 | XP_009648857.1 | XP_009653395.1 | XP_009658474.1 | XP_009652102.1 | XP_009651278.1 |
| <i>Verticillium alfalfae</i>      | XP_003001140.1 | XP_003000323.1 | XP_003004962.1 | XP_003003088.1 | XP_003008488.1 | XP_003001910.1 | XP_003008697.1 |
| <i>Fusarium graminearum</i>       | XP_011326408.1 | XP_011317913.1 | XP_011318759.1 | XP_011321519.1 | XP_011327098.1 | XP_011328452.1 | XP_011325690.1 |
| <i>Trichoderma reesei</i>         | XP_006961598.1 | XP_006967575.1 | XP_006968690.1 | XP_006963679.1 | XP_006961444.1 | XP_006967171.1 | XP_006968110.1 |
| <i>Pyrenophora teres f. teres</i> | EFQ85291.1     | EFQ86708.1     | EFQ87362.1     | EFQ94916.1     | EFQ87532.1     | EFQ90078.1     | EFQ90883.1     |
| <i>Exophiala dermatitidis</i>     | XP_009158357.1 | XP_009152994.1 | XP_009155097.1 | XP_009160537.1 | XP_009157164.1 | XP_009158625.1 | XP_009153963.1 |
| <i>Talaromyces marneffei</i>      | XP_002149209.1 | XP_002148005.1 | XP_002144223.1 | XP_002144568.1 | XP_002153252.1 | XP_002144715.1 | XP_002146145.1 |
| <i>Aspergillus clavatus</i>       | XP_001271853.1 | XP_001273950.1 | XP_001269336.1 | XP_001275231.1 | XP_001270028.1 | XP_001268051.1 | XP_001268885.1 |
| <i>Aspergillus fumigatus</i>      | XP_751852.1    | XP_754018.1    | XP_752287.1    | XP_749729.1    | XP_747559.1    | XP_750807.2    | XP_752741.1    |

S8 Table—continued.

| Species                           | <i>Ilv2p</i>   | <i>Kog1p</i>   | <i>Mcm7p</i>   | <i>Msh3p</i>   | <i>Nhx1p</i>   | <i>Pollp</i>   | <i>Pwp2p</i>   |
|-----------------------------------|----------------|----------------|----------------|----------------|----------------|----------------|----------------|
| <i>Metarhizium robertsii</i>      | XP_007816491.1 | XP_007823548.1 | XP_007821848.1 | XP_007821854.1 | XP_007819653.1 | XP_007819778.1 | XP_007823520.1 |
| <i>Metarhizium anisopliae</i>     | KID63066.1     | KID67314.1     | KID61946.1     | KID68622.1     | KID69615.1     | KID69743.1     | KID63814.1     |
| <i>Metarhizium brunneum</i>       | XP_014543805.1 | XP_014541864.1 | XP_014549333.1 | XP_014549327.1 | XP_014542447.1 | XP_014542315.1 | XP_014546680.1 |
| <i>Metarhizium majus</i>          | KID99502.1     | KIE00282.1     | KID99949.1     | KID99955.1     | KIE04015.1     | KIE00358.1     | KIE01762.1     |
| <i>Metarhizium guizhouense</i>    | KID86412.1     | KID89497.1     | KID91227.1     | KID91221.1     | KID89277.1     | KID89166.1     | KID87112.1     |
| <i>Metarhizium acridum</i>        | XP_007815194.1 | XP_007807209.1 | XP_007807415.1 | XP_007807409.1 | XP_007808877.1 | XP_007814675.1 | XP_007806813.1 |
| <i>Metarhizium album</i>          | KHN96382.1     | KHN98809.1     | KHN96339.1     | KHN96333.1     | KHO00707.1     | KHO00834.1     | KHN94619.1     |
| <i>Colletotrichum fioriniae</i>   | EXF74222.1     | EXF81496.1     | EXF75499.1     | EXF75505.1     | EXF79757.1     | EXF82237.1     | EXF76455.1     |
| <i>Penicillium oxalicum</i>       | EPS29798.1     | EPS30447.1     | EPS28829.1     | EPS25882.1     | EPS34358.1     | EPS28898.1     | EPS34493.1     |
| <i>Cladophialophora carrionii</i> | XP_008724859.1 | XP_008728362.1 | XP_008724210.1 | XP_008723156.1 | XP_008727319.1 | XP_008729389.1 | XP_008726632.1 |
| <i>Bipolaris oryzae</i>           | XP_007686096.1 | XP_007685643.1 | XP_007688178.1 | XP_007690385.1 | XP_007684471.1 | XP_007691119.1 | XP_007686458.1 |
| <i>Podospora anserina</i>         | XP_001909102.1 | XP_001906917.1 | XP_001912892.1 | XP_001908540.1 | XP_001907928.1 | XP_001908464.1 | XP_001911998.1 |
| <i>Eutypa lata</i>                | EMR68719.1     | EMR65652.1     | EMR70165.1     | EMR64149.1     | EMR62303.1     | EMR62541.1     | EMR72470.1     |
| <i>Pestalotiopsis fici</i>        | XP_007827618.1 | XP_007840655.1 | XP_007827870.1 | XP_007827789.1 | XP_007838548.1 | XP_007838538.1 | XP_007834828.1 |
| <i>Scedosporium apiospermum</i>   | XP_016646615.1 | XP_016639033.1 | XP_016646218.1 | XP_016646225.1 | XP_016641374.1 | XP_016646660.1 | XP_016639443.1 |
| <i>Colletotrichum orbiculare</i>  | ENH79298.1     | ENH86859.1     | ENH88613.1     | ENH88619.1     | ENH80979.1     | ENH81168.1     | ENH88232.1     |
| <i>Sclerotinia sclerotiorum</i>   | XP_001592310.1 | APA15738.1     | APA06545.1     | XP_001596685.1 | APA10698.1     | XP_001590014.1 | APA13628.1     |
| <i>Grossmannia clavigera</i>      | XP_014171215.1 | XP_014171821.1 | XP_014169390.1 | XP_014169283.1 | XP_014169965.1 | XP_014172589.1 | XP_014173315.1 |
| <i>Magnaporthe oryzae</i>         | XP_003709592.1 | XP_003720858.1 | XP_003709949.1 | XP_003709956.1 | XP_003717132.1 | XP_003717174.1 | XP_003711369.1 |
| <i>Sordaria macrospora</i>        | XP_003348791.1 | XP_003352471.1 | XP_003347479.1 | XP_003347472.1 | XP_003348865.1 | XP_003350431.1 | XP_003352205.1 |
| <i>Neurospora crassa</i>          | XP_011394285.1 | XP_965761.2    | XP_963878.1    | XP_963874.1    | XP_956772.2    | XP_961558.1    | XP_961183.1    |
| <i>Chaetomium globosum</i>        | XP_001224230.1 | XP_001222352.1 | XP_001220297.1 | XP_001220291.1 | XP_001229540.1 | XP_001221663.1 | XP_001224902.1 |
| <i>Verticillium dahliae</i>       | XP_009650933.1 | XP_009656124.1 | XP_009648980.1 | XP_009648971.1 | XP_009653617.1 | XP_009657651.1 | XP_009648654.1 |
| <i>Verticillium alfalfae</i>      | XP_003009694.1 | XP_003007560.1 | XP_003005090.1 | XP_003006012.1 | XP_003003300.1 | XP_003002438.1 | XP_003006291.1 |
| <i>Fusarium graminearum</i>       | XP_011316846.1 | XP_011320030.1 | XP_011326807.1 | XP_011326814.1 | XP_011324058.1 | XP_011323957.1 | XP_011327144.1 |
| <i>Trichoderma reesei</i>         | XP_006961310.1 | XP_006966540.1 | XP_006963538.1 | XP_006963537.1 | XP_006967977.1 | XP_006961367.1 | XP_006969047.1 |
| <i>Pyrenophora teres f. teres</i> | EFQ94642.1     | EFQ92871.1     | EFQ89239.1     | EFQ87396.1     | EFQ91068.1     | EFQ93598.1     | EFQ93355.1     |
| <i>Exophiala dermatitidis</i>     | XP_009154296.1 | XP_009156855.1 | XP_009152662.1 | XP_009152652.1 | XP_009157046.1 | XP_009160480.1 | XP_009154633.1 |
| <i>Talaromyces marneffei</i>      | XP_002143669.1 | XP_002151673.1 | XP_002146351.1 | XP_002148394.1 | XP_002147997.1 | XP_002151991.1 | XP_002147701.1 |
| <i>Aspergillus clavatus</i>       | XP_001271036.1 | XP_001272957.1 | XP_001275315.1 | XP_001273287.1 | XP_001273957.1 | XP_001275367.1 | XP_001276221.1 |
| <i>Aspergillus fumigatus</i>      | XP_754588.1    | XP_749386.1    | XP_755347.1    | XP_749062.1    | XP_754011.1    | XP_755406.1    | XP_748034.1    |

S8 Table—continued.

| Species                           | <i>Rvb1p</i>   | <i>Rvb2p</i>   | <i>Ssl2p</i>   | <i>Tif5p</i>   | <i>Uba1p</i>   | <i>Vma4p</i>   |
|-----------------------------------|----------------|----------------|----------------|----------------|----------------|----------------|
| <i>Metarhizium robertsii</i>      | XP_007825051.1 | XP_007823866.1 | XP_007822137.1 | XP_007819774.1 | XP_011410983.1 | XP_007823571.1 |
| <i>Metarhizium anisopliae</i>     | KID63292.1     | KID63392.1     | KID68371.1     | KID69739.1     | KID67938.1     | KID70062.1     |
| <i>Metarhizium brunneum</i>       | XP_014545129.1 | XP_014545129.1 | XP_014549042.1 | XP_014542319.1 | XP_014548615.1 | XP_014541840.1 |
| <i>Metarhizium majus</i>          | KID96742.1     | KID98626.1     | KIE02895.1     | KID98828.1     | KID97099.1     | KIE00258.1     |
| <i>Metarhizium guizhouense</i>    | KID91603.1     | KID91499.1     | KID90937.1     | KID89170.1     | KID86483.1     | KID89507.1     |
| <i>Metarhizium acridum</i>        | XP_007813570.1 | XP_007815922.1 | XP_007806957.1 | XP_007814679.1 | XP_007810318.1 | XP_007807198.1 |
| <i>Metarhizium album</i>          | KHO01946.1     | KHO02041.1     | KHO02008.1     | KHO00830.1     | KHN98973.1     | KHN98823.1     |
| <i>Colletotrichum fioriniae</i>   | EXF83265.1     | EXF86629.1     | EXF85087.1     | EXF82254.1     | EXF75988.1     | EXF85042.1     |
| <i>Penicillium oxalicum</i>       | EPS31755.1     | EPS29619.1     | EPS34518.1     | EPS29411.1     | EPS32734.1     | EPS28405.1     |
| <i>Cladophialophora carrionii</i> | XP_008722767.1 | XP_008726041.1 | XP_008726565.1 | XP_008730980.1 | XP_008729956.1 | XP_008727953.1 |
| <i>Bipolaris oryzae</i>           | XP_007683050.1 | XP_007690289.1 | XP_007688697.1 | XP_007692264.1 | XP_007691633.1 | XP_007686907.1 |
| <i>Podospora anserina</i>         | XP_001909908.1 | XP_001910063.1 | XP_001908365.1 | XP_001907948.1 | CDP26879.1     | XP_001907388.1 |
| <i>Eutypa lata</i>                | EMR65983.1     | EMR66649.1     | EMR71163.1     | EMR70767.1     | EMR61381.1     | EMR66927.1     |
| <i>Pestalotiopsis fici</i>        | XP_007838216.1 | XP_007841693.1 | XP_007832126.1 | XP_007838617.1 | XP_007831159.1 | XP_007837312.1 |
| <i>Scedosporium apiospermum</i>   | XP_016644566.1 | XP_016643586.1 | XP_016639254.1 | XP_016645028.1 | XP_016640825.1 | XP_016639121.1 |
| <i>Colletotrichum orbiculare</i>  | ENH87722.1     | ENH87848.1     | ENH85168.1     | ENH81153.1     | ENH88049.1     | ENH86989.1     |
| <i>Sclerotinia sclerotiorum</i>   | XP_001593913.1 | XP_001597906.1 | XP_001591079.1 | XP_001585325.1 | APA12814.1     | XP_001594159.1 |
| <i>Grossmannia clavigera</i>      | XP_014173578.1 | XP_014168183.1 | XP_014168336.1 | XP_014173332.1 | XP_014173053.1 | XP_014168598.1 |
| <i>Magnaporthe oryzae</i>         | XP_003719906.1 | XP_003716817.1 | XP_003717094.1 | XP_003713892.1 | XP_003714354.1 | XP_003720979.1 |
| <i>Sordaria macrospora</i>        | XP_003346757.1 | XP_003346757.1 | XP_003350492.1 | XP_003344256.1 | XP_003348751.1 | XP_003347016.1 |
| <i>Neurospora crassa</i>          | XP_955769.1    | XP_963328.1    | XP_957329.1    | XP_957252.3    | XP_956143.2    | XP_011393174.1 |
| <i>Chaetomium globosum</i>        | XP_001225843.1 | XP_001228173.1 | XP_001221811.1 | XP_001219780.1 | XP_001224114.1 | XP_001222569.1 |
| <i>Verticillium dahliae</i>       | XP_009654206.1 | XP_009655011.1 | XP_009652129.1 | XP_009653581.1 | XP_009650094.1 | XP_009656091.1 |
| <i>Verticillium alfalfae</i>      | XP_003004243.1 | XP_003004082.1 | XP_003006693.1 | XP_003003264.1 | XP_003009129.1 | XP_003007598.1 |
| <i>Fusarium graminearum</i>       | XP_011323653.1 | XP_011324910.1 | XP_011327021.1 | XP_011323961.1 | XP_011328016.1 | XP_011320157.1 |
| <i>Trichoderma reesei</i>         | XP_006961081.1 | XP_006960986.1 | XP_006963440.1 | XP_006961826.1 | XP_006962650.1 | XP_006966623.1 |
| <i>Pyrenophora teres f. teres</i> | EFQ95589.1     | EFQ96159.1     | EFQ84865.1     | EFQ86285.1     | EFQ85131.1     | EFQ90571.1     |
| <i>Exophiala dermatitidis</i>     | XP_009158557.1 | XP_009155307.1 | XP_009155640.1 | XP_009161496.1 | XP_009153236.1 | XP_009157240.1 |
| <i>Talaromyces marneffei</i>      | XP_002151212.1 | XP_002149076.1 | XP_002147757.1 | XP_002146590.1 | XP_002145371.1 | XP_002143486.1 |
| <i>Aspergillus clavatus</i>       | XP_001271944.1 | XP_001269889.1 | XP_001276200.1 | XP_001267824.1 | XP_001275860.1 | XP_001270329.1 |
| <i>Aspergillus fumigatus</i>      | XP_751754.1    | XP_749991.1    | XP_748011.1    | XP_755233.1    | XP_755911.1    | XP_747868.1    |
