# Supplementary material for: Duplication of a Pks gene cluster and subsequent functional diversification facilitate environmental adaptation in Metarhizium species
Source: PubMed Central journal article supplement (PMC6042797; doi:10.1371/journal.pgen.1007472), 2018-06-29
Supplement: pgen.1007472.s028.pdf [file pgen.1007472.s028.pdf]

**S9 Table: Primers used in this study.**

| Primer              | Sequence                                                 | Usage                                                                      |
|---------------------|----------------------------------------------------------|----------------------------------------------------------------------------|
| Bar-up              | CGCCTGGACGACTAAACC                                       | Confirmation of the gene disruptions                                       |
| Bar-down            | TCAGCCTGCCGGTACCGC                                       |                                                                            |
| ΔMAA-Pks2-5-1       | GGGGACAGCTTCTTGTACAAAGTGAAGTTGTGACTTCGGGTAG              | Disruption of <i>Pks2</i> in <i>M. robertsii</i>                           |
| ΔMAA-Pks2-5-2       | GGGGACTGCTTTTTGTACAAACTTGTGTGGACAGTATGCTATC              |                                                                            |
| ΔMAA-Pks2-3-1       | GGGGACAACCTTTGTATAGAAAAGTTGTTAAGACGTGACATGAAC            |                                                                            |
| ΔMAA-Pks2-3-2       | GGGGACAACCTTTGTATAATAAAGTTGTTCCGTGCTGTATCCATC            |                                                                            |
| ΔMAA-Pks2-CF-1      | AATCACACGTCCGCAC                                         | Confirmation of <i>Pks2</i> disruption in <i>M. robertsii</i>              |
| ΔMAA-Pks2-CF-2      | GTGCTCTTGTGCGTGAAC                                       |                                                                            |
| ΔMAN-Pks1-5-1       | GGGGACAGCTTCTTGTACAAAGTGAAGAATGAGGACCGTCTTG              | Disruption of <i>Pks1</i> in <i>M. anisopliae</i>                          |
| ΔMAN-Pks1-5-2       | GGGGACTGCTTTTTGTACAAACTTGTGCTTACCAAGTGGTCCAC             |                                                                            |
| ΔMAN-Pks1-3-1       | GGGGACAACCTTTGTATAGAAAAGTTGTTAGGTTCTGCTCATGATG           |                                                                            |
| ΔMAN-Pks1-3-2       | GGGGACAACCTTTGTATAATAAAGTTGTGCACGTCCAAGAAGTTG            |                                                                            |
| ΔMAN-Pks1-CF-1      | CGCACGAAAGTCTTCAC                                        | Confirmation of the <i>Pks1</i> disruption in <i>M. anisopliae</i>         |
| ΔMAN-Pks1-CF-2      | ATGTTGGCCTTGACAAG                                        |                                                                            |
| ΔMBR-Pks1-5-1       | GGGGACAGCTTCTTGTACAAAGTGAAGTTTCCTCTGCCATGTG              | Disruption of <i>Pks1</i> in <i>M. brunneum</i>                            |
| ΔMBR-Pks1-5-2       | GGGGACTGCTTTTTGTACAAACTTGTCTTGAGCACAGACATG               |                                                                            |
| ΔMBR-Pks1-3-1       | GGGGACAACCTTTGTATAGAAAAGTTGTTACGAACGCAACGTTCCAC          |                                                                            |
| ΔMBR-Pks1-3-2       | GGGGACAACCTTTGTATAATAAAGTTGTGTGCGCATCAAAGATG             |                                                                            |
| ΔMBR-Pks1-CF-1      | TGATCAAGTTCTGCTC                                         | Confirmation of <i>Pks1</i> disruption in <i>M. brunneum</i>               |
| ΔMBR-Pks1-CF-2      | CATGCTTCAAAGTCGTG                                        |                                                                            |
| ΔMGU-Pks1-5-1       | GGGGACAGCTTCTTGTACAAAGTGAAGTTATCGTCGCGCAACAC             | Disruption of <i>Pks1</i> in <i>M. guizhouense</i>                         |
| ΔMGU-Pks1-5-2       | GGGGACTGCTTTTTGTACAAACTTGTGTACATTGAGCCATGAG              |                                                                            |
| ΔMGU-Pks1-3-1       | GGGGACAACCTTTGTATAGAAAAGTTGTTAGGTTCTGCTCATGATG           |                                                                            |
| ΔMGU-Pks1-3-2       | GGGGACAACCTTTGTATAATAAAGTTGTGCAAGCCTTCGCTCTTG            |                                                                            |
| ΔMGU-Pks1-CF-1      | TGCTTCGCTCCATCAAC                                        | Confirmation of <i>Pks1</i> disruption in <i>M. guizhouense</i>            |
| ΔMGU-Pks1-CF-2      | CATCTTGTGTCGCATC                                         |                                                                            |
| MAJ-Pks1-RNAi-5     | gggaattcCGTGCTACAGCGGATGCCGGTCCAAAGTCCgatacgtgcctgccc    | Cloning the genomic clone for knocking down <i>Pks1</i> in <i>M. majus</i> |
| MAJ-Pks1-RNAi-3     | ggtctagaCGTGCTACAGCGGATGCCGGTCCAAAGTCCtgggaaagcgegttaca  |                                                                            |
| MAJ-Pks1-Promoter-F | ccgaattcAGAGCACTCAAATCATAG                               | Cloning the promoter for knocking down <i>Pks1</i> in <i>M. majus</i>      |
| MAJ-Pks1-Promoter-R | ccgaattcGTTGATCCGAAGGTTGC                                |                                                                            |
| ΔMAC-Pks1-5-1       | GGGGACAGCTTCTTGTACAAAGTGAAGGGCATACTCTAATTTG              | Disruption of <i>Pks1</i> in <i>M. acridum</i>                             |
| ΔMAC-Pks1-5-2       | GGGGACTGCTTTTTGTACAAACTTGTCTGCTTCTGTTATG                 |                                                                            |
| ΔMAC-Pks1-3-1       | GGGGACAACCTTTGTATAGAAAAGTTGTTATCATTAGACCTGCGAG           |                                                                            |
| ΔMAC-Pks1-3-2       | GGGGACAACCTTTGTATAATAAAGTTGTATGATAGCTGACTGGTG            |                                                                            |
| ΔMAC-Pks1-CF-1      | ATTTCCAGCTCTCTAG                                         | Confirmation of <i>Pks1</i> disruption in <i>M. acridum</i>                |
| ΔMAC-Pks1-CF-2      | GTGAAGACTTTCGTGAG                                        |                                                                            |
| MAM-Pks1-RNAi-5     | gggaattcGCTTTGTTTCAGTCACCAAGCCTCGGCCAATgatacgtgcctgeccc  | Cloning the promoter for knocking down <i>Pks1</i> in <i>M. album</i>      |
| MAM-Pks1-RNAi-3     | ggtctagaGCTTTGTTTCAGTCACCAAGCCTCGGCCAATtgggaaagcgegttaca |                                                                            |
| MAM-Pks1-Promoter-F | ccgaattcGTAAGCAATCTGTCTTATC                              | Cloning the promoter for knocking down <i>Pks1</i> in <i>M. album</i>      |
| MAM-Pks1-Promoter-R | ccgaattcGTTGATGCAGGCAGGCGTGC                             |                                                                            |
| MAA-Gpd-RT-5        | GTCGTCATCTCTGCTCCCTC                                     | <i>gpd</i> gene in <i>M. robertsii</i>                                     |
| MAA-Gpd-RT-3        | CAATGGTGAACCTGTCGTGG                                     |                                                                            |
| MAA-Tef-RT-5        | AGGCTGACTGCGCTATTCTC                                     | <i>tef</i> gene in <i>M. robertsii</i>                                     |
| MAA-Tef-RT-3        | ACTTGGTGGTGCCATCTTG                                      |                                                                            |
| MAA-Pks1-RT-5       | AACTACTTTGGAGACGGCCA                                     | qRT-PCR for <i>Pks1</i> in <i>M. robertsii</i>                             |

|                 |                                  |                                                                                                  |
|-----------------|----------------------------------|--------------------------------------------------------------------------------------------------|
| MAA-Pks1-RT-3   | ACCAAGAGGCCAACTTTGAG             |                                                                                                  |
| MAA-Pks2-RT-5   | GCACTGTCGAGAACCTGTCA             | qRT-PCR for <i>Pks2</i> in <i>M. robertsii</i>                                                   |
| MAA-Pks2-RT-3   | CACCTCGTCCCAGTTGATTT             |                                                                                                  |
| MAN-Pks1-RT-5   | ACGATCAAGCAGTCTGATAC             | qRT-PCR for <i>Pks1</i> in <i>M. anisopliae</i>                                                  |
| MAN-Pks1-RT-3   | ACTAGAAAAGGCAGGGAATG             |                                                                                                  |
| MAN-Pks2-RT-5   | TGGCCTGTTTCATCTACAAA             | qRT-PCR for <i>Pks2</i> in <i>M. anisopliae</i>                                                  |
| MAA-Pks2-RT-3   | CCAGCCACTATTACATCTCC             |                                                                                                  |
| MBR-Tef-RT-5    | TATTCTCATTATCGCTGCCG             | <i>tef</i> in <i>M. brunneum</i>                                                                 |
| MBR-Tef-RT-3    | CTCCTTGATGATTTCTCTGGT            |                                                                                                  |
| MBR-Pks1-RT-5   | ACGATCAAGCAGTCTGATAC             | qRT-PCR for <i>Pks1</i> in <i>M. brunneum</i>                                                    |
| MBR-Pks1-RT-3   | TCGAGCAACCAGATTTTGTA             |                                                                                                  |
| MBR-Pks2-RT-5   | AAAGTTTGACAAGACATGG              | qRT-PCR for <i>Pks2</i> in <i>M. brunneum</i>                                                    |
| MBR-Pks2-RT-3   | TTGCTGTGATAGTTTTCGGAA            |                                                                                                  |
| MGU-Gpd-RT-5    | AAGAAGGTCATCATCTCTGC             | <i>gpd</i> in <i>M. guizhouense</i>                                                              |
| MGU-Gpd-RT-3    | CTCGACAATGGTGAAGTTGT             |                                                                                                  |
| MGU-Pks1-RT-5   | ACGATCAAGCAGTCTGATAC             | qRT-PCR for <i>Pks1</i> in <i>M. guizhouense</i>                                                 |
| MGU-Pks1-RT-3   | ACTAGAAAAGGCAGGGAATG             |                                                                                                  |
| MGU-Pks2-RT-5   | AATTTGCACAAGACATGGAC             | qRT-PCR for <i>Pks2</i> in <i>M. guizhouense</i>                                                 |
| MGU-Pks2-RT-3   | TGGGAAGGTGATTTTCTCG              |                                                                                                  |
| MAJ-Gpd-RT-5    | CAGCTTTACTCTTGCGAATG             | <i>gpd</i> in <i>M. majus</i>                                                                    |
| MAJ-Gpd-RT-3    | AGAACTTGACCTTCTTGCC              |                                                                                                  |
| MAJ-Pks1-RT-5   | ACGATCAAGCAGTCTGATAC             | qRT-PCR for <i>Pks1</i> in <i>M. majus</i>                                                       |
| MAJ-Pks1-RT-3   | TCGAGCAACCAGATTTTGTA             |                                                                                                  |
| MAJ-Pks2-RT-5   | TTTTGGCGAGAAAATACAGC             | qRT-PCR for <i>Pks2</i> in <i>M. majus</i>                                                       |
| MAJ-Pks2-RT-3   | GTGACAGTTTTGGAATTGGG             |                                                                                                  |
| MAC-Gpd-RT-5    | CCAGCTTTTAGTTTTGCGAA             | <i>gpd</i> in <i>M. acridum</i>                                                                  |
| MAC-Gpd-RT-3    | TTGATGTCGCCCTTGAAAAAT            | <i>tef</i> in <i>M. acridum</i>                                                                  |
| MAC-Tef-RT-5    | GGGTAAGGAAGACAAGACTC             |                                                                                                  |
| MAC-Tef-RT-3    | TGTAGGCTCCAAAACATACC             |                                                                                                  |
| MAC-Pks1-RT-5   | CAAGAGGCATATCCAAC                | qRT-PCR for <i>Pks1</i> and the fragment PS2 in Fig. S1 in <i>M. acridum</i>                     |
| MAC-Pks1-RT-3   | GTCCGAGCAACCAAGAG                |                                                                                                  |
| MAC-Pks2-RT-5   | GAAATAATGGAAGCTGTCCG             | qRT-PCR for <i>Pks2</i> in <i>M. acridum</i>                                                     |
| MAC-Pks2-RT-3   | ACACCACCCAATACTTTAC              |                                                                                                  |
| MAM-Gpd-RT-5    | AAGAAGGTCATCATCTCTGC             | <i>gpd</i> in <i>M. album</i>                                                                    |
| MAM-Gpd-RT-3    | CCTCAACAATGGTGAAGTTG             |                                                                                                  |
| MAM-Pks1-RT-5   | CCAAATACCCACGTCTC                | qRT-PCR for <i>Pks1</i> and the fragment PS2 in Fig. S1 in <i>M. album</i>                       |
| MAM-Pks1-RT-3   | AGAGGACGAGCAAGAAG                |                                                                                                  |
| MAC-Pks1-RT-6-F | CCAGCTGTACGATCCTG                | RT-PCR analysis of the fragment PS3 in <i>M. acridum</i> in Fig. S1                              |
| MAC-Pks1-RT-6-R | CACCTTCTCCAAGAATC                |                                                                                                  |
| MAM-Pks1-RT-6-F | CTGATTATGACTGCATC                | RT-PCR analysis of the fragment PS3 in <i>M. album</i> in Fig. S1                                |
| MAM-Pks1-RT-6-R | GCAAACCTCTGGTGGTC                |                                                                                                  |
| PS1-5           | MAC-Pks1-RT-6-F/ MAM-Pks1-RT-6-F | RT-PCR analysis of the fragment PS1 in Fig. S1.                                                  |
| PS1-3           | MAC-Pks1-RT-3/ MAM-Pks1-RT-3     |                                                                                                  |
| MAC-Pks1-Re-F   | ATGGAACACGTGACGATC               | RT-PCR analysis of the fragment PS4 in <i>M. acridum</i> in Fig. S1.                             |
| MAC-Pks1-Re-R   | GCAACCAAGAGGCCAAC                |                                                                                                  |
| MAM-Pks1-Re-F   | ATGGAGCACGTGATAATC               | RT-PCR analysis of the fragment PS4 in <i>M. album</i> in Fig. S1.                               |
| MAM-Pks1-Re-R   | TTGAGTGACACAAGGAC                |                                                                                                  |
| MAA_Arp1-5      | GGATCCATGAACCAATCTTTAACCC        | Cloning the genomic clone of <i>M. robertsii</i> <i>Arp1</i> for constructing expression plasmid |
| MAA_Arp1-3      | GATATCCTACGAATGTTTCTCCGAC        |                                                                                                  |

|                |                                                                                                                                                                 |                                                                                                  |
|----------------|-----------------------------------------------------------------------------------------------------------------------------------------------------------------|--------------------------------------------------------------------------------------------------|
| MAA-Pks2-OE-5  | GGATTTAAATATGGCAACGCAGGATGCGCCTAT                                                                                                                               | Cloning the genomic clone of <i>M. robertsii</i>                                                 |
| MAA-Pks2-OE-3  | GGATTTAAATCTAGCTGGGACCAAGCAAAAATTC                                                                                                                              | <i>Pks2</i> for constructing overexpressing vector                                               |
| MAA-Pks2-SEQ-F | AGTCCAGCAACGGACAG                                                                                                                                               | Confirming the insertion of <i>M. robertsii Pks2</i>                                             |
| Trpc-seq-5     | TTCTTGTGACATGGAG                                                                                                                                                | into the genomes of <i>M. album</i> and $\Delta Pks2$                                            |
| MAA_Pks1_F1    | CTTCAGTATATTCATCTTCCCATCCAAGAACCTTTAATCGATGAACCACGTGACGA<br>TCAAGCAG                                                                                            | Amplification of <i>M. robertsii's Pks1</i> for<br>heterologous expression in <i>A. nidulans</i> |
| MAA_Pks1_R1    | CTCGACTTGGCAAGCTATGGC                                                                                                                                           |                                                                                                  |
| MAA_Pks1_F2    | GATGCTGGCCATCCGAAGCAG                                                                                                                                           |                                                                                                  |
| MAA_Pks1_R2    | CACAACATATTTTCGTCAGACACAGAATAACTCTCGCTAGCGGTTGAGAGACCAT<br>AAACAATG                                                                                             |                                                                                                  |
| MAA_Pks1_RT_F  | CTGGTCAGCGATTGGCTCTAG                                                                                                                                           | Confirmation of the insertion of <i>Pks1</i> into the<br>genome of <i>A. nidulans</i>            |
| MAA_Pks1_RT_R  | GTCGTGATCTGCAATGGCATC                                                                                                                                           |                                                                                                  |
| MAA_Pks2_F1    | CTTCAGTATATTCATCTTCCCATCCAAGAACCTTTAATCGCCGTCAAGAGAAGAGC<br>TGTAATG                                                                                             | Amplification of <i>M. robertsii's Pks2</i> for<br>heterologous expression in <i>A. nidulans</i> |
| MAA_Pks2_R1    | GCACCACAATGGTAACCAAGG                                                                                                                                           |                                                                                                  |
| MAA_Pks2_F2    | CTTGCTGCGCTGTATCAGGC                                                                                                                                            |                                                                                                  |
| MAA_Pks2_R2    | CACAACATATTTTCGTCAGACACAGAATAACTCTCGCTAGGACTGGCTGCTCGATT<br>GGACC                                                                                               |                                                                                                  |
| MAA_Pks2_RT_F  | GCATATCGCCCAAGGAGGCAG                                                                                                                                           | Confirmation of the insertion of <i>Pks2</i> into the<br>genome of <i>A. nidulans</i>            |
| MAA_Pks2_RT_R  | CGAAGGTGCGCAGGACAGAAC                                                                                                                                           |                                                                                                  |
| The loop DNA   | GATACGCTGGCCTGCCAACCTTTTCGGTATAAAGACTTCGCGCTGATACCAGACG<br>TTGCCCGCATAATTACGAATATCTGCATCGGCGAACTGATCGTTAAAACCTGCCTG<br>GCACAGCAATTGCCCGGCTTTCTTGTAAACGCGTTTCCCA | The DNA fragment for the loop in a dsRNA<br>for RNAi                                             |

---
