# Supplementary material for: Duplication of a Pks gene cluster and subsequent functional diversification facilitate environmental adaptation in Metarhizium species
Source: PubMed Central journal article supplement (PMC6042797; doi:10.1371/journal.pgen.1007472), 2018-06-29
Supplement: pgen.1007472.s032.pdf [file pgen.1007472.s032.pdf]

## Supplementary dataset 4

### Alignment of KS domain

|                                            |                                                      |
|--------------------------------------------|------------------------------------------------------|
| <b>PKS1-<i>Metarhizium robertsii</i></b>   | SKIAIIGMSGRFPESADVEAFWDL LHQGLDVHRPVPPDRFNGELYYDVTG  |
| <b>PKS1-<i>Metarhizium anisopliae</i></b>  | SKIAIIGMSGRFPESADVEAFWDL LHQGLDVHRPVPPDRFNGELYYDVTG  |
| <b>PKS1-<i>Metarhizium brunneum</i></b>    | SKIAIIGMSGRFPESADVEAFWDL LHQGLDVHRPVPPDRFNGELYYDVTG  |
| <b>PKS1-<i>Metarhizium guizhouense</i></b> | SKIAIIGMSGRFPESADVEAFWDL LHQGLDVHRPVPPDRYNGELYYDVTG  |
| <b>PKS1-<i>Metarhizium majus</i></b>       | SKIAIIGMSGRFPESADVEAFWDL LHQGLDVHRPVPPDRYNGELYYDVTG  |
| <b>PKS1-<i>Metarhizium acridum</i></b>     | SKIAIIGMSGRFPESADVEAFWDL LYQGLDVHRPVPPDRFNGESYYDVTG  |
| <b>PKS1-<i>Metarhizium album</i></b>       | SKIAIIGMSGRFPEAADVEAFWAVLYKGLDVHRVPKDRYDGELYYDPTG    |
| <b>PKS-<i>Colletotrichum fioriniae</i></b> | SKIAIVAMSGRFPDAANLDEFWDLVLYQGRDVHRQIPEDRFDAVSHYDATG  |
| <b>PKS-<i>Trichoderma reesei</i></b>       | SKIAIVGMSGRFPESADVEAFWDL LYQGLDVHRRVPADRYNAELYYDPTG  |
| <b>PKS-<i>Fusarium graminearum</i></b>     | SKIAIVAMSGRFPDAADLGEFWDLLYKGRDVHRQIPEDRFNAELHYDATG   |
| <b>PKS2-<i>Metarhizium robertsii</i></b>   | SKIAIIGMSGRFPEAADLDSFWSLLEQGVDAIRPVPPDRFDAHAHHDETG   |
| <b>PKS2-<i>Metarhizium anisopliae</i></b>  | SKIAIIGMSGRFPEAADLDSFWSLLEQGVDAIRPVPPDRFDAHAHHDETG   |
| <b>PKS2-<i>Metarhizium brunneum</i></b>    | SKIAIIGMSGRFPEAADLDSFWSLLEQGVDAIRPVPPDRFDAHAHHDETG   |
| <b>PKS2-<i>Metarhizium guizhouense</i></b> | -KIAIIGMSGRFPEAADLDSFWSLLEQGVDAIRPVPPDRFDAHAHHDETG   |
| <b>PKS2-<i>Metarhizium majus</i></b>       | SKIAIIGMSGRFPEAADLDSFWSLLEQGVDAIRQVPPDRFDAHAHHDETG   |
| <b>PKS2-<i>Metarhizium acridum</i></b>     | SKIAIIGMSGRFPEAADLDSFWSLLVQGVDAIRPVAPDRFDAHAHYDETG   |
| <b>PKS-<i>Talaromyces marneffe</i></b>     | SKIAIIGLSGRFPDAPSPPEHFWNLLYQGLDVHREVPPDRWNWKTHTVDLTG |
| <b>PKS-<i>Penicillium oxalicum</i></b>     | SKIAIIGLSGRFPEAQDTEAFWDL LYKGLDVHREVPPDRWDVEAHVDMEG  |
| <b>PKS-<i>Aspergillus fumigatus</i></b>    | SKIAIIGMSGRFPEADGIEAFWDL LYKGLDVHKKVPPERWDVDAHVDLTG  |
| <b>PKS-<i>Aspergillus clavatus</i></b>     | SKIAIIGMSGRFPEADGVEAFWDL LYKGLDVHKTVPDRWDVDAHVDLTG   |

### Conserved motif

|                                            |                                      |                 |         |
|--------------------------------------------|--------------------------------------|-----------------|---------|
| <b>PKS1-<i>Metarhizium robertsii</i></b>   | KRKNTCKVMHGCWINDPGLFDAKFFNISPKEAEQS  | <b>DPAQRLXL</b> | ATAYEAL |
| <b>PKS1-<i>Metarhizium anisopliae</i></b>  | KRKNTCKVMHGCWINDPGLFDAKFFNISPKEAEQS  | DPAQRLAL        | ATAYEAL |
| <b>PKS1-<i>Metarhizium brunneum</i></b>    | KRKNTCKVMHGCWINDPGLFDAKFFNISPKEAEQS  | DPAQRLAL        | ATAYEAL |
| <b>PKS1-<i>Metarhizium guizhouense</i></b> | KRKNTCKVMHGCWINDPGLFDAKFFNISPKEAEQS  | DPAQRLAL        | ATAYEAL |
| <b>PKS1-<i>Metarhizium majus</i></b>       | KRKNTCKVMHGCWINEPGLFDAKFFNISPKEAEQS  | DPAQRLAL        | ATAYEAL |
| <b>PKS1-<i>Metarhizium acridum</i></b>     | KRKNTCKVMHGCWINEPGLFDAKFFNISPKEAEQS  | DPAQRLAL        | ATAYEAL |
| <b>PKS1-<i>Metarhizium album</i></b>       | KKKNTCKVMHGCWINEPGLFDAKFFNISPKEAEQS  | DPAQRLAL        | TTAYEAL |
| <b>PKS-<i>Colletotrichum fioriniae</i></b> | RRKNTSKVMNGCWIIEPGLFDAKFFNISPKEAEQS  | DPAQRLAL        | ETAYEAL |
| <b>PKS-<i>Trichoderma reesei</i></b>       | KRKNTSKIMHGCWINEPGLFDAKFFNISPKEAEQS  | DPAQRLAL        | ATAYEAL |
| <b>PKS-<i>Fusarium graminearum</i></b>     | RRKNTSKVMNGCFIKEPGLFDARFFNMSPKAEQS   | DPAQRMAL        | ETAYEAL |
| <b>PKS2-<i>Metarhizium robertsii</i></b>   | RRKNTSKVLGGCWINQPGLFDPKFFSISPKEAEQS  | DPAQRLAL        | QTAYEAL |
| <b>PKS2-<i>Metarhizium anisopliae</i></b>  | RRKNTSKVLGGCWINQPGLFDPKFFSISPKEAEQS  | DPAQRLAL        | QTAYEAL |
| <b>PKS2-<i>Metarhizium brunneum</i></b>    | RRKNTSKVLGGCWINQPGLFDPKFFSISPKEAEQS  | DPAQRLAL        | QTAYEAL |
| <b>PKS2-<i>Metarhizium guizhouense</i></b> | RRKNTSRVLGGCWINQPGLFDPKFFSISPKEAEQS  | DPAQRLAL        | QTAYEAL |
| <b>PKS2-<i>Metarhizium majus</i></b>       | RRKNTSRVLGGCWINQPGLFDPKFFSISPKEAEQS  | DPAQRLAL        | QTAYEAL |
| <b>PKS2-<i>Metarhizium acridum</i></b>     | RRKNTSKVLGGCWINQPGLFDPKFFSISPKEAEQS  | DPAQRLAL        | QTAYEAL |
| <b>PKS-<i>Talaromyces marneffe</i></b>     | KKRNTSQVPYGCWIPEPGLFDPFRFFNMSPREALQA | DPAQRLAL        | VTAYEAL |
| <b>PKS-<i>Penicillium oxalicum</i></b>     | NKRNTSKVQYGCWIPEPGLFDPFRFFNMSPREALQA | DPAQRLAL        | LTAYEAF |
| <b>PKS-<i>Aspergillus fumigatus</i></b>    | TKRNTSKVPYGCWINEPGLFDARFFNMSPREALQA  | DPAQRLAL        | LSAYEAL |
| <b>PKS-<i>Aspergillus clavatus</i></b>     | TKRNTSKVPFGCWINEPGMFDARFFNMSPREALQA  | DPAQRLAL        | LTAYEAL |

|                                            |                                                     |
|--------------------------------------------|-----------------------------------------------------|
| <b>PKS1-<i>Metarhizium robertsii</i></b>   | EAAGVVADRTPTSTQRDRVGVVFYGMTSDDYREVS---CGQNVDTY----- |
| <b>PKS1-<i>Metarhizium anisopliae</i></b>  | EAAGVVADRTPTSTQRDRVGVVFYGMTSDDYREVS---CGQNVDTY----- |
| <b>PKS1-<i>Metarhizium brunneum</i></b>    | EAAGVVADRTPTSTQRDRVGVVFYGMTSDDYREVS---CGQNVDTY----- |
| <b>PKS1-<i>Metarhizium guizhouense</i></b> | EAAGVVADRTPTSTQRDRVGVVFYGMTSDDYREVS---CGQNVDTY----- |
| <b>PKS1-<i>Metarhizium majus</i></b>       | EAAGVVADRTPTSTQRDRVGVVFYGMTSDDYREVS---CGQNVDTY----- |
| <b>PKS1-<i>Metarhizium acridum</i></b>     | ESAGVVADRTPTSTQRDRVGVVFYGMTSDDYREVS---CGQNVDTY----- |
| <b>PKS1-<i>Metarhizium album</i></b>       | ESAGVVAGRTPTSTQRDRVGVVFYGMTSDDYREVRASVCKPQCKPFYTKAN |
| <b>PKS-<i>Colletotrichum fioriniae</i></b> | EMAGIVPDRTPTSTQRDRVGVVFYGMTSDDWREVN---SGQNVDTY----- |
| <b>PKS-<i>Trichoderma reesei</i></b>       | EMAGIVADRTPTSTQRDRVGVVFYGMTSDDYREVS---CGQNVDTY----- |
| <b>PKS-<i>Fusarium graminearum</i></b>     | EMAGIVPDRTPTSTQRDRVGVVFYGMTSDDWREVN---SGQNVDTY----- |
| <b>PKS2-<i>Metarhizium robertsii</i></b>   | EMAGVVPDRTQSTQRDRVGVVFYGMVSDDWREIN---SGQNIDTY-----  |
| <b>PKS2-<i>Metarhizium anisopliae</i></b>  | EMAGVVPDRTQSTQRDRVGVVFYGMVSDDWREIN---SGQNIDTY-----  |
| <b>PKS2-<i>Metarhizium brunneum</i></b>    | EMAGVVPDRTQSTQRDRVGVVFYGMVSDDWREIN---SGQNIDTY-----  |
| <b>PKS2-<i>Metarhizium guizhouense</i></b> | EMAGVVPDRTQSTQRDRVGVVFYGMVSDDWREIN---SGQNIDTY-----  |
| <b>PKS2-<i>Metarhizium majus</i></b>       | EMAGVVPDRTQSTQRDRVGVVFYGMVSDDWREIN---SGQNIDTY-----  |
| <b>PKS2-<i>Metarhizium acridum</i></b>     | EMAGMVPDRTQSTQRERVGVVFYGM-----                      |
| <b>PKS-<i>Talaromyces marneffeii</i></b>   | EMAGFVPDSTPTSTQKDRVGIIFYGMTSDDYREIN---SGQDIDTY----- |
| <b>PKS-<i>Penicillium oxalicum</i></b>     | EMAGFIPDSTPTSTQKNRVGVVFYGMTSDDYREIN---SGQDIDTY----- |
| <b>PKS-<i>Aspergillus fumigatus</i></b>    | EMAGFVPNSSPTSTQRDRVGIIFMGMTSDDYREIN---SGQDIDTY----- |
| <b>PKS-<i>Aspergillus clavatus</i></b>     | EMAGFIPNSTPTSTQRDRVGIIFYGMTSDDYREIN---SGQDIDTY----- |

**Conserved motif**

|                                            | <b>GPS</b>                                                           | <b>DTACSSSL</b> |
|--------------------------------------------|----------------------------------------------------------------------|-----------------|
| <b>PKS1-<i>Metarhizium robertsii</i></b>   | FIPGGNRAFTPGKIN YFFKYC <b>GPSVSV</b> <b>DTACSSSL</b> AAIHLACNSIWRNEC |                 |
| <b>PKS1-<i>Metarhizium anisopliae</i></b>  | FIPGGNRAFTPGKIN YFFKYC <b>GPSVSV</b> <b>DTACSSSL</b> AAIHLACNSIWRNEC |                 |
| <b>PKS1-<i>Metarhizium brunneum</i></b>    | FIPGGNRAFTPGKIN YFFKYC <b>GPSVSV</b> <b>DTACSSSL</b> AAIHLACNSIWRNEC |                 |
| <b>PKS1-<i>Metarhizium guizhouense</i></b> | FIPGGNRAFTPGKIN YFFKYC <b>GPSVSV</b> <b>DTACSSSL</b> AAIHLACNSIWRNEC |                 |
| <b>PKS1-<i>Metarhizium majus</i></b>       | FIPGGNRAFTPGKIN YFFKYC <b>GPSVSV</b> <b>DTACSSSL</b> AAIHLACNSIWRNEC |                 |
| <b>PKS1-<i>Metarhizium acridum</i></b>     | FIPGGNRAFTPGKIN YFFKYC <b>GPSVSV</b> <b>DTACSSSL</b> AAIHLACNSIWRNEC |                 |
| <b>PKS1-<i>Metarhizium album</i></b>       | LTTGGNRAFTPGKIN YFFKYC <b>GPSVSV</b> <b>DTACSSSL</b> AAIHLACNSIWRNEC |                 |
| <b>PKS-<i>Colletotrichum fioriniae</i></b> | FIPGGNRAFTPGR LNYFFKFS <b>GPSASI</b> <b>DTACSSSL</b> TAIHMALNSLWRNDC |                 |
| <b>PKS-<i>Trichoderma reesei</i></b>       | FIPGGNRAFTPGKIN YFFKYC <b>GPSVSV</b> <b>DTACSSSL</b> AAIHLACNSIWRNEC |                 |
| <b>PKS-<i>Fusarium graminearum</i></b>     | FIPGGNRAFTPGR LNYFFKFS <b>GPSASV</b> <b>DTACSSSL</b> AALHLACNSLWRNDC |                 |
| <b>PKS2-<i>Metarhizium robertsii</i></b>   | FIPGGIRAFTPGR INYHFKFS <b>GPSITV</b> <b>DTACSSSL</b> AAIHVACNSLWRGDC |                 |
| <b>PKS2-<i>Metarhizium anisopliae</i></b>  | FIPGGIRAFTPGR INYHFKFS <b>GPSITV</b> <b>DTACSSSL</b> AAIHVACNSLWRGDC |                 |
| <b>PKS2-<i>Metarhizium brunneum</i></b>    | FIPGGIRAFTPGR INYHFKFS <b>GPSITV</b> <b>DTACSSSL</b> AAIHVACNSLWRGDC |                 |
| <b>PKS2-<i>Metarhizium guizhouense</i></b> | FIPGGIRAFTPGR INYHFKFS <b>GPSITV</b> <b>DTACSSSL</b> AAIHVACNSLWRGDC |                 |
| <b>PKS2-<i>Metarhizium majus</i></b>       | FIPGGIRAFTPGR INYHFKFS <b>GPSITV</b> <b>DTACSSSL</b> AAIHVACNSLWRGDC |                 |
| <b>PKS2-<i>Metarhizium acridum</i></b>     | FTQGGIRAFTPGR INYHFKFS <b>GPSITV</b> <b>DTACSSSL</b> AAIHVACNSLWRGDC |                 |
| <b>PKS-<i>Talaromyces marneffeii</i></b>   | FIPGGNRAFTPGR INYHFKFS <b>GPSVSV</b> <b>DTACSSSL</b> SAIHMALNSLWRNDC |                 |
| <b>PKS-<i>Penicillium oxalicum</i></b>     | FIPGGNRAFTPGR INYHFKFS <b>GPSVSV</b> <b>DTACSSSL</b> AAIHVACNSLWRNEC |                 |
| <b>PKS-<i>Aspergillus fumigatus</i></b>    | FIPGGNRAFTPGR INYHFKFS <b>GPSVSV</b> <b>DTACSSSL</b> AAIHLACNAIWRNDC |                 |
| <b>PKS-<i>Aspergillus clavatus</i></b>     | FIPGGNRAFTPGR INYHFKFS <b>GPSVSV</b> <b>DTACSSSL</b> AAIHLACNAIWRNDC |                 |

**Conserved motif**

**GYCRAD**

|                                            |                                                      |
|--------------------------------------------|------------------------------------------------------|
| <b>PKS1-<i>Metarhizium robertsii</i></b>   | DTAIAGGTNVMSNPDSFVGLDRGYFLSRTGNCHTFDDDDADGYCRADAVGT  |
| <b>PKS1-<i>Metarhizium anisopliae</i></b>  | DTAIAGGTNVMSNPDSFVGLDRGYFLSRTGNCHTFDDEADGYCRADAVGT   |
| <b>PKS1-<i>Metarhizium brunneum</i></b>    | DTAIAGGTNVMSNPDSFVGLDRGYFLSRTGNCHTFDDEADGYCRADAVGT   |
| <b>PKS1-<i>Metarhizium guizhouense</i></b> | DTAIAGGTNVMSNPDSFVGLDRGYFLSRTGNCHTFDDEADGYCRADAVGT   |
| <b>PKS1-<i>Metarhizium majus</i></b>       | DTAIAGGTNVMSNPDSFVGLDRGYFLSRTGNCHTFDDEADGYCRADAVGT   |
| <b>PKS1-<i>Metarhizium acridum</i></b>     | DTAIAGGTNVMTNPDSFVGLDRGYFLSRTGNCHTFDDEADGYCRADAVGT   |
| <b>PKS1-<i>Metarhizium album</i></b>       | DTAVAGGTNVMSNPDSFVGLDRGHFLSRKGNCNFDDDEADGYCRADAVAT   |
| <b>PKS-<i>Colletotrichum fioriniae</i></b> | DTAIAGGTNVMTNPDNFAGLDRGHFLSRTGNCNTFDDGADGYCRADGVGT   |
| <b>PKS-<i>Trichoderma reesei</i></b>       | DTAVAGGTNVMSNPDSFAGLDRGHFLSRTGNCNTFDDAADGYCRADAVGT   |
| <b>PKS-<i>Fusarium graminearum</i></b>     | DTAIAGGTNVMTNPDNFAGLDRGHFLSRTGNCNTFDDGADGYCRADGVGT   |
| <b>PKS2-<i>Metarhizium robertsii</i></b>   | DTAVAGGVNVLTNPDI FAGLDRGHFLSTTGNCKTFDDDDADGYCRADGVGT |
| <b>PKS2-<i>Metarhizium anisopliae</i></b>  | DTAVAGGVNVLTNPDI FAGLDRGHFLSTTGNCKTFDDDDADGYCRADGVGT |
| <b>PKS2-<i>Metarhizium brunneum</i></b>    | DTAVAGGVNVLTNPDI FAGLDRGHFLSTTGNCKTFDDDDADGYCRADGVGT |
| <b>PKS2-<i>Metarhizium guizhouense</i></b> | DTAVAGGVNVLTNPDI FAGLDRGHFLSTTGNCKTFDDDDADGYCRADGVGT |
| <b>PKS2-<i>Metarhizium majus</i></b>       | DTAVAGGVNVLTNPDI FAGLDRGHFLSTTGNCKTFDDDDADGYCRADGVGT |
| <b>PKS2-<i>Metarhizium acridum</i></b>     | DTAVAGGVNVLTNPDI FAGLDRGHFLSTTGNCKTFDDDDADGYCRADGVGT |
| <b>PKS-<i>Talaromyces marneffei</i></b>    | DTAIAGGTNVLTNPDNHAGLDRGHFLSRTGNCNTFDDAADGYCRADGVGT   |
| <b>PKS-<i>Penicillium oxalicum</i></b>     | DSAVAGGVNILTNPDNHAGLDRGHFLSRTGNCNTFDDGADGYCRADGIGS   |
| <b>PKS-<i>Aspergillus fumigatus</i></b>    | DTAISGGVNLTLTNPDNHAGLDRGHFLSRTGNCNTFDDGADGYCRADGVGT  |
| <b>PKS-<i>Aspergillus clavatus</i></b>     | DSAITGGVNLTLTNPDNHAGLDRGHFLSRTGNCNTFDDGADGYCRADGVGS  |

|                                            |                                                     |
|--------------------------------------------|-----------------------------------------------------|
| <b>PKS1-<i>Metarhizium robertsii</i></b>   | VILKRLEDAIADHDPILGVISGALTNHSADAVSITRPHSGAQEEIFSKLL  |
| <b>PKS1-<i>Metarhizium anisopliae</i></b>  | VILKRLEDAIADHDPILGVISGALTNHSADAVSITRPHSGAQEEIFSKLL  |
| <b>PKS1-<i>Metarhizium brunneum</i></b>    | VILKRLEDAIADHDPILGVISGALTNHSADAVSITRPHSGAQEEIFSKLL  |
| <b>PKS1-<i>Metarhizium guizhouense</i></b> | VILKRLEDAIADHDPILGVISGALTNHSADAVSITRPHSGAQEEIFSKLL  |
| <b>PKS1-<i>Metarhizium majus</i></b>       | VILKRLEDAIADHDPILGVISGALTNHSADAVSITRPHSGAQEEIFSKLL  |
| <b>PKS1-<i>Metarhizium acridum</i></b>     | VILKRLEDAIADHDPILGIISGAYTNHSADSIVSITRPHSGAQEEIFSKLL |
| <b>PKS1-<i>Metarhizium album</i></b>       | VVLKRLEDAMADHDPILGVISGAHTNHSAESVSI TRPHSGAQEEIFSKLL |
| <b>PKS-<i>Colletotrichum fioriniae</i></b> | IVLKRLEDAEADNDPILGVIAGAYTNHSAEAVSITRPHAGAQEYIFSKLL  |
| <b>PKS-<i>Trichoderma reesei</i></b>       | VVLKRLEDAVADHDPILGVILGAHTNHSAESVSI TRPHCGAQEEIFSKIL |
| <b>PKS-<i>Fusarium graminearum</i></b>     | IILKRLEDAEADNDPILGVIILGAYTNHSAEAVSITRPHAGAQEYIFSKLL |
| <b>PKS2-<i>Metarhizium robertsii</i></b>   | VILKRLEDAVMDKDPILAVLNSAYTNHSAEAVSITRPHAGAQELIFSKLL  |
| <b>PKS2-<i>Metarhizium anisopliae</i></b>  | VILKRLEDAVMDKDPILAILNSAYTNHSAEAVSITRPHAGAQELIFSKLL  |
| <b>PKS2-<i>Metarhizium brunneum</i></b>    | VVLKRLEDAVMDKDPILAVLNSAYTNHSAEAVSITRPHAGAQERIFSKLL  |
| <b>PKS2-<i>Metarhizium guizhouense</i></b> | VILKRLEDAVMDKDPILAVLNSAYTNHSAEAVSITRPHAGAQELIFSKLL  |
| <b>PKS2-<i>Metarhizium majus</i></b>       | VILKRLEDAVMDKDPILAVLNSAYTNHSAEAVSITRPHAGAQELIFSKLL  |
| <b>PKS2-<i>Metarhizium acridum</i></b>     | VILKRLEDAIMDKDPILAVLNSAYTNHSAEAVSITRPHAGAQELIFSKLL  |
| <b>PKS-<i>Talaromyces marneffei</i></b>    | VVLKRLEDAIADNDPIQAVIAGAYTNHSAEAVSMTRPHSGAQAFIFDKLL  |
| <b>PKS-<i>Penicillium oxalicum</i></b>     | VVLKRLEDAQADNDPIYGV IAGAYTNHSAEAVSITRPHAGAQAFIFDKLL |
| <b>PKS-<i>Aspergillus fumigatus</i></b>    | IVLKRLEDAEADNDPILGVINAAYTNHSAEAVSITRPHVGAQAFIFNKLL  |
| <b>PKS-<i>Aspergillus clavatus</i></b>     | IVLKRLEDAEADNDPILGVINAAYTNHSAEAVSITRPHVGAQAFIFNKLL  |



## Alignment of AT domain

**PKS1-*Metarhizium robertsii*** FVFSGQGSQYSAMGQHLLH-FTI FRDEVHAYDILAQRHGFPSIMPLIDGS  
**PKS1-*Metarhizium anisopliae*** FVFSGQGSQYSAMGQHLLH-FTI FRDEVHAYDILAQRHGFPSIMPLIDGS  
**PKS1-*Metarhizium brunneum*** FVFSGQGSQYSAMGQHLLH-FTI FRDEVHAYDILAQRHGFPSIMPLIDGS  
**PKS1-*Metarhizium guizhouense*** FVFSGQGSQYSAMGQHLLH-FTI FRDEVHAYDILAQRHGFPSIMPLIDGS  
**PKS1-*Metarhizium majus*** FVFSGQGSQYSAMGQHLLH-FTI FRDEVHAYDILARRHGFPSIMPLIDGS  
**PKS1-*Metarhizium acridum*** FVFSGQGSQYSAIGRHLLH-FTI FRDEVNSYDILAQRHGFPSIMPLIDGS  
**PKS1-*Metarhizium album*** FVFSGQGSQYGAMGKHLH-YTI FRGEIDSYDILAQRHGFPSIMPLVDGS  
**PKS-*Trichoderma reesei*** FAFSGQGSQYSAMGQHLLQ-FAS FRDEIDSYDRLAQRHGFPSILPLIDGS  
**PKS-*Colletotrichum fiorinia*** FVFSGQGAQYSGMGKEYFNSFSLFRSEIQSYDRIGQSQGFPSILPLITGE  
**PKS-*Fusarium graminearum*** FVFSGQGAQYRGMGKEYFTSFTA FRSEIMSYDSIAQAQGFPSILPLIRGE  
**PKS2-*Metarhizium robertsii*** FVFSGQGAQYAGMGRHLFHNHT FRTQILACNQICLSHGFPSILEIFKQD  
**PKS2-*Metarhizium anisopliae*** FVFSGQGAQYAGMGRHLFQNNHT FRTQILACNQICLSQGFPSILEIFKQD  
**PKS2-*Metarhizium brunneum*** FVFSGQGAQYAGMGRHLFQNNHT FRTQILACNQICLSQGFPSILEIFKQD  
**PKS2-*Metarhizium guizhouense*** FVFSGQGAQYAGMGRHLFQNNHT FRTQILACNRICLSQGFPSILEIFTQD  
**PKS2-*Metarhizium majus*** FVFSGQGAQYAGMGRHLFQNNHAFRTQILACNQICRSQGFPSILEIFEQD  
**PKS2-*Metarhizium acridum*** FVFSGQGAQYAGMGRHLFQNNET FRTQVLACNQICLSQGFPSILDIFNQG  
**PKS-*Talaromyces marneffe*** FIIFTGQGAQYAGMGKQFFESFSQFRSDILRFNGIAQSQGFPSFLPLIDGS  
**PKS-*Penicillium oxalicum*** FVFTGQGAQYTGMGKQLYEDCATFRSTIHRLD CIAQSQGFPSILPLIDGS  
**PKS-*Aspergillus fumigatus*** FVFTGQGAQYSGMGKQLYEDCATFRSIIHRFDCIARSQGFPSIIHLIDGS  
**PKS-*Aspergillus clavatus*** FIIFTGQGAQYAGMGKDLFHHNKQFRDNVEHLDRIALSHGFPSIMPLIDGS

**PKS1-*Metarhizium robertsii*** VDIEDLEPLVVQLGTVCVQMALASLWMALGMRPAYVVGHSLGHYAALKVA  
**PKS1-*Metarhizium anisopliae*** VDIEDLEPLVVQLGTVCVQMALASLWMALGMRPAYVVGHSLGHYAALKVA  
**PKS1-*Metarhizium brunneum*** VDIEDLEPLVVQLGTVCVQMALASLWMALGMRPAYVVGHSLGHYAALKVA  
**PKS1-*Metarhizium guizhouense*** VDIEDLEPLVVQLGTVCVQMALASLWMALGMRPAYVVGHSLGHYAALKVA  
**PKS1-*Metarhizium majus*** VDIEDLEPLVVQLGTVCVQMALASLWMALGMRPAYVVGHSLGHYAALKVA  
**PKS1-*Metarhizium acridum*** VDIEDLEPLVVQLGTVCVQMALASLWIAFGMRPAYVVGHSLGHYAALKVA  
**PKS1-*Metarhizium album*** VAIEHLEPLVVQLGTVCVQMALASLWIAFGMQPSYVVGHSLGHFAALKVS  
**PKS-*Trichoderma reesei*** SNIDDLEPLVVQLGTTCVQMALASFWMSLGMQPAYVVGHSLGHYAALKVA  
**PKS-*Colletotrichum fiorinia*** AEVESSSPVETQLSLACLQMALAKLWKSFGIEASFVLGHSLGHYAALNVA  
**PKS-*Fusarium graminearum*** VEADSLSPVEIQGLTCLQMALAKLWKSFGVEPGFVLGHSLGHYAALHVA  
**PKS2-*Metarhizium robertsii*** VDMNSLEPLLVLGTTCLQMSLVAFWKS LGVTPDFCI GHSLGEYAALQAA  
**PKS2-*Metarhizium anisopliae*** VDMNSLEPLLVLGTTCLQMSLVSFWKS LGVTPDFCI GHSLGEYAALQAA  
**PKS2-*Metarhizium brunneum*** VDMNSLEPLVVQLGTTCLQMSLVSFWKS LGVTPDFCI GHSLGEYAALQAA  
**PKS2-*Metarhizium guizhouense*** VDMNSLEPLVFQLGTTCLQMSLVSFWKS LGVTPDFCI GHSLGEYAALQAA  
**PKS2-*Metarhizium majus*** VDVNSLEPLLVLGTTCLQMSLVSFWKS LGVTPDFCI GHSLGEYAALQAA  
**PKS2-*Metarhizium acridum*** VEMNNLEPLVVQLGTTCLQMSLVSFWKS LGVTPDFCI GHSLGEYAALQAA  
**PKS-*Talaromyces marneffe*** MPIEEMSPVITQLGTTCLQMALANLWASWETRPTFVMGHSLGEYAALYVS  
**PKS-*Penicillium oxalicum*** MPVEELSPVVTQLGTTCLQMALVDYWKGLGVTPAFVLGHSLGDYAALNSA  
**PKS-*Aspergillus fumigatus*** VPVEGLSPVVTQLGTTCLQMALVDYWRGLGVSPAFLGHSLGDYAALNSA  
**PKS-*Aspergillus clavatus*** VPVEELSPVVTQLGTTCLQMALTKLWISLGVTPSFVLGHSLGEYAALNSA

PKS1-*Metarhizium robertsii* GVL TASDTIYLVAMRARLLQNKCSRGS SHAMLAIRSSAAEIQAHLDEGIHD  
PKS1-*Metarhizium anisopliae* GVL TASDTIYLVAMRARLLQNKCSRGS SHAMLAIRSSVAEIQAHLDEGIYD  
PKS1-*Metarhizium brunneum* GVL TASDTIYLVATRARLLQNKCSRGS SHAMLAIRSSAAEIQAHLDEGIHD  
PKS1-*Metarhizium guizhouense* GVL TASDTIYLVAMRARLLQNKCSRGS SHAMLAIRSSAAAIQAHLDEGIHD  
PKS1-*Metarhizium majus* GVL TASDTIYLVAMRARLLQNKCSRGS SHAMLAIRSSADEIQAHLDEGIHD  
PKS1-*Metarhizium acridum* GVL TASDTIYLVAMRARLLQNKCSRGS HTMLAIRSSADEMQAYLDEDIYD  
PKS1-*Metarhizium album* GALTASDTIYLVGMRARLLQNKCSIGS SHAMLA VRSSAEDVQAYLDADVHD  
PKS-*Trichoderma reesei* GVL TASDTIYLVGMRARLLQEKCSRGS SHAMLAIRSSVDQIQPYLDAALHD  
PKS-*Colletotrichum fioriniae* GVLSASDTIYLTGTRAQLLLDNCEAGS SHAMLA VRASVLQIRQFLNANIHE  
PKS-*Fusarium graminearum* GVLSANDTIYLTGIRAQLLVDKCQAGTHS MLAVRASLLQIQQFLDANIHE  
PKS2-*Metarhizium robertsii* GVLSVSDTIYLTGIRARMLQEKCSAGS SHAMLA VRAPLARVNALLDPAIHE  
PKS2-*Metarhizium anisopliae* GVLSVSDTIYLTGIRARMLQEKCSAGS SHAMLA VRAPLARVNALLDPAIHE  
PKS2-*Metarhizium brunneum* GVLSVSDTIYLTGIRARMLQEKCSAGS SHAMLA VRAPLARVNALLDPAIHE  
PKS2-*Metarhizium guizhouense* GVLSVSDTIYLTGIRARMLQEKCSAGS SHAMLA VRAPLARVNALLDPGIHE  
PKS2-*Metarhizium majus* GVLSVSDAIYLTGTRARMLQEKCSAGS SHAMLA VRAPLARVNALLDPAIHE  
PKS2-*Metarhizium acridum* GVLSVSDTIYLTGIRARLLQKKCSAGS SHAMLA VRAPLAQVHGFFNPSIHE  
PKS-*Talaromyces marneffe* GTLTAFDTIYLCGRRQQLLEGKCKVGT HAMLAVRSALSEITPFLNPGIHE  
PKS-*Penicillium oxalicum* GVLSTSDTIYLCGRRQQLTQQCQMGT HAMLAVKAAVSEIQHLLDPDVHA  
PKS-*Aspergillus fumigatus* GVLSTSDTIYLCGRRQQLTEQQCQMGT HAMLAVKAAVSDIQHLLDAEAHA  
PKS-*Aspergillus clavatus* GILTNSDTIFLAGRRQQLTEQCKVGT HAMLAVKSSVAQVKQFLDDGAAE

PKS1-*Metarhizium robertsii* IACINGPQDTVVSGCIDDIDRLS QKLMKGIKATRVNVPFAFHSAQVDPPI  
PKS1-*Metarhizium anisopliae* IACINGPQDTVVSGCIDDIDRLS QKLMKGIKATRVNVPFAFHSAQVDPPI  
PKS1-*Metarhizium brunneum* IACINGPQDTVVSGCIDDIDRLS QKLMKGIKATRVNVPFAFHSAQVDPPI  
PKS1-*Metarhizium guizhouense* IACINGPQDTVVSGCIDDIDRLS QKLMKGIKATRVNVPFAFHSAQVDPPI  
PKS1-*Metarhizium majus* IACISGPQDTVVSGCIDDIDRLS QKLTDKGIKATRVNVPFAFHSAQVDPPI  
PKS1-*Metarhizium acridum* IACINGPQDTVVSGCIDDIDRLS QKLMNRIK VTRVNVPFAFHSAQVDPPI  
PKS1-*Metarhizium album* IACINSPQDTVVSGRVDDIDRLSERLLDKGIKATRVNVPFAFHSSQVEPI  
PKS-*Trichoderma reesei* VACINGPQDTVVSGCVDEISSLAQKLT DNGVKATRVEVPFAFHSAQVDPV  
PKS-*Colletotrichum fioriniae* VACINGPREVVISGKVADVNQLAERLAADNIKATRVQVPYAFHSAQVDPPI  
PKS-*Fusarium graminearum* VACVNGPREVVISGRVADIDQLVGLLSADNIKATRVKVPFAFHSAQVDPPI  
PKS2-*Metarhizium robertsii* VTCLNGPQDVVIGGRVADVEELEKELAKQDIKAVKVSVPFAFHSTQVEPI  
PKS2-*Metarhizium anisopliae* VTCLNGPQDVVIGGRVADVEALEKELAKQDIKAVKVSVPFAFHSTQVEPI  
PKS2-*Metarhizium brunneum* VTCLNGPQDVVIGGRVADVEELERELAKQDIKAVKVSVPFAFHSTQVEPI  
PKS2-*Metarhizium guizhouense* VTCLNGPHDVVIGGRVADVEDLEKELAKEDIKAVKVSVPFAFHSTQVDPPI  
PKS2-*Metarhizium majus* VTCLNGPRDVVIGGRVADVEELEKELAKQDVKAAKVSVPFAFHSTQVDPPI  
PKS2-*Metarhizium acridum* VTCLNSPHDVAIGGLVADIEDLERELAENNI EAVKVSVPFAFHSTQVEPI  
PKS-*Talaromyces marneffe* VACINAPGETVISATSQNIDALSEQLV AAGIKVTKLKVPFAFHSSQVEPI  
PKS-*Penicillium oxalicum* VACINGPTETVISGLSGRIDE LAQQCSSQN LKSTKLVKVPFAFHSAQVDPPI  
PKS-*Aspergillus fumigatus* VACINGPTETVISGLSGHIDE LAEQLTGQSLKSTKLVKVPFAFHSAQVTPPI  
PKS-*Aspergillus clavatus* IACINAPSETVISGAVGKIEQLAEKLTN EGFKATKLVKVPFAFHSAQVEPI

**PKS1-Metarhizium robertsii** LDELEAIASQVEFHAPRVAIGCP LLGKTFTAGETPSLEAKHIRRHCRETV  
**PKS1-Metarhizium anisopliae** LDELEAIASQVEFHAPRVAIGCP LLGKTFKAGETPSLEAKHIRRHCRETV  
**PKS1-Metarhizium brunneum** LDELEAVASQVEFHAPRVAIGCP LLSKTFKAGETPSLEAKHIRRHCRETV  
**PKS1-Metarhizium guizhouense** LDELEAIASQVEFHAPRVAIGCP LLGRTFKAGETPSLEANHIRRHCRETV  
**PKS1-Metarhizium majus** LDELEATASQVEFHAPRVAIGCP LLGKTFKAGETPSLEANHIRRHCRETV  
**PKS1-Metarhizium acridum** LDELEAIASQVEFHAPRVAIGCP LLGKTFFVAGETSSLGADHIKRHCRETV  
**PKS1-Metarhizium album** LDELGAIASQVKFHSPCPVIGCP LQGKSLPGETLTSEASHVKRHCRQTV  
**PKS-Trichoderma reesei** LDELEAIASHVTFHSPRVPIGCP LLGKTFFHIGETPSFDAKHISRHCREAV  
**PKS-Colletotrichum fioriniae** LSDLDVAASRVIFHSPQIPVLCAL EASIFRPGDHGSIGPLHIQRHCRETV  
**PKS-Fusarium graminearum** LSDLDTAASRVTFHSPQIPVLCAL DSSVISPGNHGVIGPLHLQRHCRETV  
**PKS2-Metarhizium robertsii** LGEFCDAARGVPEFQTQNI PVIST LLGEVVQPEATGVFGPYLKRHCREPV  
**PKS2-Metarhizium anisopliae** LGEFCDAARGVPEFQTQTIPV VST LLGEVVQPEAAGVFGPYLKRHCREPV  
**PKS2-Metarhizium brunneum** LGEFCDAARGVPEFQTQTIPV IST LLGEVVHPETTGVFGPYLKRHCREPV  
**PKS2-Metarhizium guizhouense** LGEFCAAARGVPEFQTQNI PVIST LLGEVVQPETTGVFGPEYLKRHCREPV  
**PKS2-Metarhizium majus** LGEFCAAARGVPEFQTQSMPV IST LLGEVVQPETTGVFGPEYLKRHCREPV  
**PKS2-Metarhizium acridum** LDEFCAAASVQFQTQRIPV IST LLGEVVLPEAKAVFGPEYLKRHCREPV  
**PKS-Talaromyces marneffeii** LEELTNAAKGVKFKHKSIP LVSP LLGEVINERNYEQLGKYLRSRHCRETV  
**PKS-Penicillium oxalicum** LESFEESAQGVIFHEPAVPFVSAL NGEVITESNYSVLGPTYMVKHCREAV  
**PKS-Aspergillus fumigatus** LDPFEDKAQGVVFKHKSVPFVSAL TGEVITEENYEV LGPRYMVKHCRETV  
**PKS-Aspergillus clavatus** LESLAEIAQGVIFRKPTIPYVSAL LIGNVIDESNAHMLEASYLTRHCRETV

**PKS1-Metarhizium robertsii** NFDVLRSAKDDGFVSE--KTAWIEIIGPHTVCSNLVKANINQDITAVPSL  
**PKS1-Metarhizium anisopliae** NFDVLRSAKDDGFVSD--KTAWIEIIGPHTVCSNLVKANINQDITAVPSL  
**PKS1-Metarhizium brunneum** NFDVLRSAKDDGLVSE--KTAWIEIIGPHTVCSNLVKANINQDITAVPSL  
**PKS1-Metarhizium guizhouense** NFDVLRSAKDEGFVSE--KTAWIEIIGPHTVCSNLVKANINQDIVAVPSL  
**PKS1-Metarhizium majus** NFDVLRSAKDDGFVSE--KTAWIEIIGPHTVCSKLVKANISQDIVAVPSL  
**PKS1-Metarhizium acridum** NFRDILRSKAGDGLISE--KTAWIEIIGPHTVCSSTLLRANINQDIVAVPSL  
**PKS1-Metarhizium album** NFERGILQSAKSDGLVSE--KTAWIEIIGPHTVCSMLVKANINHDVTAVPSL  
**PKS-Trichoderma reesei** NFERGILQSAKEEGVISE--KTTWIEVGPHTVCSNLVKANLQDITAVPSL  
**PKS-Colletotrichum fioriniae** NFEALKAAREGLITASG STLWIEIIGPHTVCSSTFLKASLG-----  
**PKS-Fusarium graminearum** NFEALHAAREKIINKT-STLWIEIIGPHVVCSTFLKSS-----  
**PKS2-Metarhizium robertsii** NFAAAVEAARDANVIHA--GTVFVEIIGPHPVCLALLKSNMGPDAVTLASL  
**PKS2-Metarhizium anisopliae** NFAAAVQAARDANVIHA--GTVFVEIIGPHPVCLALLKSNMGPDAVTLASL  
**PKS2-Metarhizium brunneum** NFAAAVQAARDANLIHA--GTVFVEIIGPHPVCSALLKSNMGPDAVTLASL  
**PKS2-Metarhizium guizhouense** NFAAAVQAGRANLIHA--GTVFVEIIGPHPVCLALLKSNMGPDAVTLASL  
**PKS2-Metarhizium majus** DFAAAVRAGRANLIHA--GTVFVEIIGPHPVCLALLKSNMGPDAVTLASL  
**PKS2-Metarhizium acridum** NFTAQAQAGKDANIINS--ASVFIEIIGPHTVCSALLKSNIGPNAVTLPSL  
**PKS-Talaromyces marneffeii** NFLAAIEASRHAKLMSD--KTVWIEIIGSHTICSGMIKSTLGPQANTVASL  
**PKS-Penicillium oxalicum** NFLGALEATRHA KLMD--ATLWVEVGSHPICSGMIKSTFGPQATTVPSL  
**PKS-Aspergillus fumigatus** NFLGGLEATRHA KLME--TTVWLEVGSHPICSGMIKSTFGPQATTVPSL  
**PKS-Aspergillus clavatus** NFLGALEATRHA SLMND--KSLWVEIIGSHPVCSGMVKSTFGPQAATIPSL

|                                            |                         |
|--------------------------------------------|-------------------------|
| <b>PKS1-<i>Metarhizium robertsii</i></b>   | MRNKDQWQVL-----         |
| <b>PKS1-<i>Metarhizium anisopliae</i></b>  | MRNKDQWQVLA-----        |
| <b>PKS1-<i>Metarhizium brunneum</i></b>    | MRNKDQWQVLA-----        |
| <b>PKS1-<i>Metarhizium guizhouense</i></b> | MRNKDQWQVLA-----        |
| <b>PKS1-<i>Metarhizium majus</i></b>       | MRNKDQWQVLA-----        |
| <b>PKS1-<i>Metarhizium acridum</i></b>     | MRNKDQWQV-----          |
| <b>PKS1-<i>Metarhizium album</i></b>       | MRSQDQWQVL-----         |
| <b>PKS-<i>Trichoderma reesei</i></b>       | VRKQDQ-----             |
| <b>PKS-<i>Colletotrichum fioriniae</i></b> | -----                   |
| <b>PKS-<i>Fusarium graminearum</i></b>     | -----                   |
| <b>PKS2-<i>Metarhizium robertsii</i></b>   | HRKD-----               |
| <b>PKS2-<i>Metarhizium anisopliae</i></b>  | HR-----                 |
| <b>PKS2-<i>Metarhizium brunneum</i></b>    | HRK-----                |
| <b>PKS2-<i>Metarhizium guizhouense</i></b> | HR-----                 |
| <b>PKS2-<i>Metarhizium majus</i></b>       | HR-----                 |
| <b>PKS2-<i>Metarhizium acridum</i></b>     | HRKDDQWKVLADTL-----     |
| <b>PKS-<i>Talaromyces marneffei</i></b>    | RRNEDSW-----            |
| <b>PKS-<i>Penicillium oxalicum</i></b>     | RRDDDPWKILSNLSTLHLAGVE  |
| <b>PKS-<i>Aspergillus fumigatus</i></b>    | RRDEDPWKII SNLSTLHLAGVE |
| <b>PKS-<i>Aspergillus clavatus</i></b>     | RRQEDTWKVF SNLSALYTSGI- |



## Alignment of PP-Binding domain

|                                            |                                             |
|--------------------------------------------|---------------------------------------------|
| <b>PKS1-<i>Metarhizium robertsii</i></b>   | K---IVAEEI GIPASV-DNGLVFADYGVDLSLSISGR      |
| <b>PKS1-<i>Metarhizium anisopliae</i></b>  | K---IVAEEI GIPASV-DNGLVFADYGVDLSLSISGR      |
| <b>PKS1-<i>Metarhizium brunneum</i></b>    | K---IVAEEI GIPASV-DNGLVFADYGVDLSLSISGR      |
| <b>PKS1-<i>Metarhizium guizhouense</i></b> | K---IVSEEI GIPASV-DNGLVFADYGVDLSLSISGR      |
| <b>PKS1-<i>Metarhizium majus</i></b>       | K---IVSEEI GIPASV-DNGLVFADYGVDLSLSISGR      |
| <b>PKS1-<i>Metarhizium acridum</i></b>     | ALFKIVSEEI GIPASV-QNDLVFADYGVDLSLSISGR      |
| <b>PKS1-<i>Metarhizium album</i></b>       | AVLRILSEEI GIPLTSL-QYDLVFADYGVDLSLSITISGR   |
| <b>PKS-<i>Trichoderma reesei</i></b>       | AVIKILSEEI GIPLGSI-QDDLAFADYGVDLSLSITISGR   |
| <b>PKS-<i>Colletotrichum fioriniae</i></b> | PLLRILSEEI GLSLSLDLNDDDLDFADHGVDSLSLSITITGR |
| <b>PKS-<i>Fusarium graminearum</i></b>     | PLLRILSEEI GLGLDVLSDDELDFADHGVDSLSLSITITGR  |
| <b>PKS2-<i>Metarhizium robertsii</i></b>   | RILAILSKEV GLSMETL-TDDLVFADYGVDLSLSITITGR   |
| <b>PKS2-<i>Metarhizium anisopliae</i></b>  | RILAILSKEV GLSMETL-TDDLVFADYGVDLSLSITITGR   |
| <b>PKS2-<i>Metarhizium brunneum</i></b>    | RILAILSKEV GLSMEIL-TDDLVFADYGVDLSLSITITGR   |
| <b>PKS2-<i>Metarhizium guizhouense</i></b> | RILAILSKEV GLSLETL-TDDLVFADYGVDLSLSITITGR   |
| <b>PKS2-<i>Metarhizium majus</i></b>       | I-LVMLAAEV GLSLETL-TDDLVFADYGVDLSLSITITGR   |
| <b>PKS2-<i>Metarhizium acridum</i></b>     | RILVILAAEV GLSLETL-TDDLVFADYGVDLSLSITITGR   |
| <b>PKS-<i>Talaromyces marneffeii</i></b>   | I----LAGEV GLSEAEL-SDDLVFSDYGVDLSLALITITGK  |
| <b>PKS-<i>Penicillium oxalicum</i></b>     | L--NILAAEV GLSTSEM-TDDLNFADYGVDLSLSITVITGR  |
| <b>PKS-<i>Aspergillus fumigatus</i></b>    | L--EILAAEV GLSEAEM-TDSLNFADYGVDLSLSITVITGR  |
| <b>PKS-<i>Aspergillus clavatus</i></b>     | L--EILAAEV GLSESEM-TDGLNFADYGVDLSLSITVITGR  |

|                                            |                               |
|--------------------------------------------|-------------------------------|
| <b>PKS1-<i>Metarhizium robertsii</i></b>   | LREELDL DVES SAFETCATLADLAAQ- |
| <b>PKS1-<i>Metarhizium anisopliae</i></b>  | LREELDL DVES SAFETCATLADLAAHL |
| <b>PKS1-<i>Metarhizium brunneum</i></b>    | LREELDL DVES SAFETCATLADLAAHL |
| <b>PKS1-<i>Metarhizium guizhouense</i></b> | LREELDL DVES SAFETCATLADLATHL |
| <b>PKS1-<i>Metarhizium majus</i></b>       | LREELDL DVES SAFETCATLADLATHL |
| <b>PKS1-<i>Metarhizium acridum</i></b>     | LREELDL DVES SVFETCATLADLATHL |
| <b>PKS1-<i>Metarhizium album</i></b>       | LREELDL DIES SVFETCATVGDFAVH- |
| <b>PKS-<i>Trichoderma reesei</i></b>       | LREELDL DVES SVFEACATFADFIAHL |
| <b>PKS-<i>Colletotrichum fioriniae</i></b> | MREDLGI DVDS SAFITCPTLGQLKKF- |
| <b>PKS-<i>Fusarium graminearum</i></b>     | MREELGL DVES TAFMNCPTLGSF---- |
| <b>PKS2-<i>Metarhizium robertsii</i></b>   | IREELGL DMDS SIFTHYSTLGELKAFL |
| <b>PKS2-<i>Metarhizium anisopliae</i></b>  | IREELGL DMDS SIFTHYSTLGELKAFL |
| <b>PKS2-<i>Metarhizium brunneum</i></b>    | IREELGL DMDS SIFTHYSTLGELKAFL |
| <b>PKS2-<i>Metarhizium guizhouense</i></b> | IREELDL DMDS SIFTHYSTLGELKEF- |
| <b>PKS2-<i>Metarhizium majus</i></b>       | IREELGL DMDS SIFTHYSTLGELKAFL |
| <b>PKS2-<i>Metarhizium acridum</i></b>     | IREELDL DVDS STFTNCSTLGEL---- |
| <b>PKS-<i>Talaromyces marneffeii</i></b>   | FREQLNL DFESS IFMDYPTVKDFK--- |
| <b>PKS-<i>Penicillium oxalicum</i></b>     | YREEIGL DLDS SVFVDQPTIKDFKQM- |
| <b>PKS-<i>Aspergillus fumigatus</i></b>    | YREELNL DLESS VFMDYPTIKDFKAYL |
| <b>PKS-<i>Aspergillus clavatus</i></b>     | YREELNL DLESS VFMDYPTIKDFKAYL |

## Alignment of PS-DH domain

|                                            |                                                       |
|--------------------------------------------|-------------------------------------------------------|
| <b>PKS1-<i>Metarhizium robertsii</i></b>   | H-----VVNGNRVCSSSLYTDFGVTLGSYILEKY                    |
| <b>PKS1-<i>Metarhizium anisopliae</i></b>  | H-----VVNGNRVCSSSLYTDFGVTLGSYILEKY                    |
| <b>PKS1-<i>Metarhizium brunneum</i></b>    | L-----                                                |
| <b>PKS1-<i>Metarhizium guizhouense</i></b> | H-----VVNGNRVCSSSLYTDFGVTLGSYILEKY                    |
| <b>PKS1-<i>Metarhizium majus</i></b>       | H-----VVNGNRVCSSSLYTDFGVTLGSYILEKY                    |
| <b>PKS1-<i>Metarhizium acridum</i></b>     | Y-----ILEY                                            |
| <b>PKS1-<i>Metarhizium album</i></b>       | H-----VVNGNRVCTSSLYADFGVTLGTYILDKY                    |
| <b>PKS-<i>Trichoderma reesei</i></b>       | H-----VVNGNRVCTSSLYTDFGVTLGNYILEKH                    |
| <b>PKS-<i>Colletotrichum fioriniae</i></b> | A-----                                                |
| <b>PKS-<i>Fusarium graminearum</i></b>     | H-----RVNGVKVCTSSVYADVGLTLGKYILDNY                    |
| <b>PKS2-<i>Metarhizium robertsii</i></b>   | Q-----GHKVNEMLC TSSLYAEIGMTLGRQLLEKY                  |
| <b>PKS2-<i>Metarhizium anisopliae</i></b>  | V--TIVVQSDFGSARLADVAQGHKVNEMLC TSSLYAEIGMTLGRHLLLEKY  |
| <b>PKS2-<i>Metarhizium brunneum</i></b>    | V--TIVVQSDFGSARLADVAQGHKVNEMLC TSSLYAEIGMTLGRQLLEKY   |
| <b>PKS2-<i>Metarhizium guizhouense</i></b> | Q-----GHKVNEMLC TSSLYAEIGMTLGRQLLEKH                  |
| <b>PKS2-<i>Metarhizium majus</i></b>       | R-----GHKVNEMLC TSSLYAEIGMTLGRQLLEKY                  |
| <b>PKS2-<i>Metarhizium acridum</i></b>     | E-----GHKVNEMLC TSSLYAEIGMTLGRQLLEKY                  |
| <b>PKS-<i>Talaromyces marneffeii</i></b>   | K-ATVITETDISDPDLCVILGHKVNGTPLCPSSLYADIAQT LAEYLIDNF   |
| <b>PKS-<i>Penicillium oxalicum</i></b>     | NSASVLIENDIADPELNRVIQGHKVNGAALCPSSLYADIAQT LAEFLVDKY  |
| <b>PKS-<i>Aspergillus fumigatus</i></b>    | P-----ELNRVIQGHKVNQUALTPSSLYADIAQTLVDHLITKY           |
| <b>PKS-<i>Aspergillus clavatus</i></b>     | P-----DLNRVIQGHKVNQUALTPSSLYADIAQTLVDHLITTY           |
| <b>PKS1-<i>Metarhizium robertsii</i></b>   | RPDLQGHAVDVQDMVVKALVHKE-----GPTMLLRIDVVLDTTDSKAASM    |
| <b>PKS1-<i>Metarhizium anisopliae</i></b>  | RPDLQGHAVDVQDMVVKALVHKE-----GPTMLLRIDVVLDTTDSKAASM    |
| <b>PKS1-<i>Metarhizium brunneum</i></b>    | ----QGHAVDVQDMVVKALVHKE-----GPTMLLRIDVVLDTTDSKAASM    |
| <b>PKS1-<i>Metarhizium guizhouense</i></b> | RPDLQDHAVDVQDMVVKALVHKE-----GPTMLLRIDVVLDMTDSKAASM    |
| <b>PKS1-<i>Metarhizium majus</i></b>       | RPDLQDHAVDVQDMVVKALVHKE-----GPTMLLRIDVVLDMTDSKAASM    |
| <b>PKS1-<i>Metarhizium acridum</i></b>     | RPDLKDHSVDVQDMVVKALVHKE-----GSTMLLRINVIDMTDGKAASM     |
| <b>PKS1-<i>Metarhizium album</i></b>       | RADLKDHSVDVQEMVVKPLVHKE-----GLPMLLRIDVVHDMTASKSATM    |
| <b>PKS-<i>Trichoderma reesei</i></b>       | RVDLKDHSVDVQKMHKALVHKE-----GQPMLLRIEVTHDVTLGKDASM     |
| <b>PKS-<i>Colletotrichum fioriniae</i></b> | -----VNVHHMQVYKPLILKEDASGTS LPTPF SIEVKYRID-TLTASM    |
| <b>PKS-<i>Fusarium graminearum</i></b>     | RTDLEGYAVDVHGVHVKPLLLKEDMNGT PQATPFRIEVRYPIQ-STTALM   |
| <b>PKS2-<i>Metarhizium robertsii</i></b>   | RPDLQGYSTEIKDMSVDKPLILKDE----NKQTLFRAEVVHDKS-THTATM   |
| <b>PKS2-<i>Metarhizium anisopliae</i></b>  | RPDLQGYSTEIKDMSVDKPLILKDE----NKQTLFRAEVVHDKT-THTATM   |
| <b>PKS2-<i>Metarhizium brunneum</i></b>    | RPDLQGYSTEIQDMSVDKPLILKDE----NKQTLFRAEVVHDKS-THTASM   |
| <b>PKS2-<i>Metarhizium guizhouense</i></b> | RPDLQGYSTEIQDMSVDKPLILKDE----NKQTLFRAEVVHDKS-THTAAM   |
| <b>PKS2-<i>Metarhizium majus</i></b>       | RPDLQGSSTEIQDMSVDRPLILKDE----NKQTLFRAEVVHDKS-TPTATM   |
| <b>PKS2-<i>Metarhizium acridum</i></b>     | RPDLQGYSTEIEDMSVDKPLILKEK----NKETLFRAEVVHDKS-TLTAAM   |
| <b>PKS-<i>Talaromyces marneffeii</i></b>   | KPELKGVGLDVADMAVPKPLIYKN-----AGPQLFRAAATADWD-ARQVSM   |
| <b>PKS-<i>Penicillium oxalicum</i></b>     | KPEWKDRGFDVCDVVPKPLIAK-----GGKQLFRVSATATWA-EESAKM     |
| <b>PKS-<i>Aspergillus fumigatus</i></b>    | KPEYQGLGLDVC DMTVPKPLIAK-----SGDQFFRVS AVMSWA-EQKASV  |
| <b>PKS-<i>Aspergillus clavatus</i></b>     | KPELQGLGLDVC DMTVPKPLIAK-----SGDQFFRISAVM NWA-DKKA AV |

**PKS1-Metarhizium robertsii** SIYSVNSK-GNKTADHAQSSLHFEQPKVWLKSWDSTQYYVERSIEWLKEKA  
**PKS1-Metarhizium anisopliae** SIYSVNSK-GNKTADHAQSSLHFEQPKVWLKSWDSTQYYVERSIEWLKEKA  
**PKS1-Metarhizium brunneum** SIYSVNSK-GNKTADHAQSSLHFEQPKVWLKSWDSTQYYVERSIEWLKEKA  
**PKS1-Metarhizium guizhouense** SIYSVNSK-GNKTADHAQSSLHFEQPKVWLKSWDSTQYYVERSIEWLKEKA  
**PKS1-Metarhizium majus** SIYSVNSK-GNKTAEHAQSSLHFERPKVWLKSWDSTQYYVERSIEWLKEKA  
**PKS1-Metarhizium acridum** SIYSVNSK-GDKTADHAQSSLHFEQPKVWLKSWDSTQYYVERSIEWLKEKA  
**PKS1-Metarhizium album** SIYSINAK-GNKTVDHAKSSLCFGESRAWLRSWDSTQYYVERSIEWLKEKA  
**PKS-Trichoderma reesei** SIYSINPM-GKKTADHAQCTLSFGQPKVWLKSWDSTQYYVERSIEWLKEKA  
**PKS-Colletotrichum fioriniae** TIRSGGSHHDGLGTHVDCELRFENPKDWEAEWDRQAYLIKRSIEYLESRA  
**PKS-Fusarium graminearum** SISTTGP--NQQHIKHANCELRLHPSQWEAEWDRQAYLINRSVNYLLQRS  
**PKS2-Metarhizium robertsii** SIYSVDSA-GNKTVDHARCLLRFADPTSWLDEWERTHYLIDRSVRWLEERA  
**PKS2-Metarhizium anisopliae** SIYSVDSA-GNKTVDHARCLLRFADPTSWLDEWERTYYLIDRSVRWLEERA  
**PKS2-Metarhizium brunneum** SIYSVDSA-GNKTVDHARCLLRFADPNWLEEWERTYYLIDRSVHWLEERA  
**PKS2-Metarhizium guizhouense** SIYSVDSA-GNKTVDHARCLLRFADPNWLEEWERTYYLIDRSVRWLEERA  
**PKS2-Metarhizium majus** SIYSVDSA-GNKTVDHARCLLRFADPTSWLDEWERTYYLIDRSVRWLEERA  
**PKS2-Metarhizium acridum** SIYSVDSA-GKKTVDHACILRFADPKSWLDEWERTYYSIERSVRWLEEARV  
**PKS-Talaromyces marneffeii** QIYSVTPE-GRKMTDHASCIKFFDTKAAREEWKRNAYLIQRSVDRLFESA  
**PKS-Penicillium oxalicum** QIWSVTPE-GKKILDHASCTIKFFDTAAATEWKRSAYLIKRSIEHLKQST  
**PKS-Aspergillus fumigatus** QVWSVNGD-GKKMAEHAHCTVKLFNCAERETEWKRNAYLIKRSVSLLDQKA  
**PKS-Aspergillus clavatus** QVYSVNAE-GKKMIEHANCTVKLFDKADREMEWKRISYLVKRSVSLLDQKA

**PKS1-Metarhizium robertsii** DQGLNSRMSSGVIYKLFSSLVDYSTA-YKGMQEAIVNTEDFEATALVRFQV  
**PKS1-Metarhizium anisopliae** DQGLNSRMSSGVIYKLFSSLVDYSTA-YKGMQEAIVNTEDFEATALVRFQV  
**PKS1-Metarhizium brunneum** DQGLNSRMSSGVIYKLFSSLVDYSTA-YKGMQEAIVNTEDFEATALVRFQV  
**PKS1-Metarhizium guizhouense** DQGLNSRMSSGVIYKLFSSLVDYSTA-YKGMQEAIVNTEDFEATALVRFQV  
**PKS1-Metarhizium majus** DQGLNSRMSSGVIYKLFSSLVDYSTA-YKGMQEAIVNTEDFEATALVRFQV  
**PKS1-Metarhizium acridum** DQGLNSRMSSGVIYKLFSSLVDYSTA-YKGMQEAIVNTEDFEATALVRFQV  
**PKS1-Metarhizium album** DQGLNSRLSSGVIYKLFSSLVEYSSA-YKGMKEAIVNTEDFEATALVQFQV  
**PKS-Trichoderma reesei** DQGLNSRLSSGVIYKLFSSLVDYSQA-YKGMQEAIVDAEDFEATALVQFQV  
**PKS-Colletotrichum fioriniae** TQGLDSTLATGMIYKVFSSLVDYQQDGFKGLREVVLHSEDLGTAQVRFQV  
**PKS-Fusarium graminearum** AQGLDSMLATGMVYKVFSSLVDYADG-YKGLQEVVLHSSQELEGTAQVRFQV  
**PKS2-Metarhizium robertsii** EQGTDSELLSRGIVYKLFSSLVDYSPS-FKGLQEVILNSGDREAAAKVRLQA  
**PKS2-Metarhizium anisopliae** EQGTDSELLSKGIVYKLFSSLVDYSPS-FKGLQEVILNSGDREAAAKVRLQA  
**PKS2-Metarhizium brunneum** EQGTDSELLSRGIVYKLFSSLVDYSPS-FKGLQEVILNSGDREAAAKVRLQA  
**PKS2-Metarhizium guizhouense** EQGTDSELLSKGIVYKLFSSLVDYSPS-FKGLQEVILNSGDREATAKVRLQA  
**PKS2-Metarhizium majus** EQGTDSELLSKGIVYKLFSSLVDYSPS-FKGLQEVILNSGDREATAKVRLQA  
**PKS2-Metarhizium acridum** EQGTDSELLSKGIVYKLFSSLVDYSPS-FKGLQEVILNSDREATAKVRLQA  
**PKS-Talaromyces marneffeii** ANGDSNKLPGMVYKLFALVDYDKN-YKSMREVIILSDENYEATALVKFQA  
**PKS-Penicillium oxalicum** ESGQAHRMKRGMVYKLFSTLVEYDEN-YKSIQEVILSDSEHEATALVKLQA  
**PKS-Aspergillus fumigatus** QTGEAHRMQRGMVYKLFALVDYDEN-FKAIQEVILSDSNEHEATARVKFQA  
**PKS-Aspergillus clavatus** QTGEAHRMQRGMVYKLFALVDYDEN-FKSIQEVVLDSKQHEATAKVKFQA

**PKS1-*Metarhizium robertsii*** DEGNFRCNPMWVDS CGQLAGFLMNGHAKT - PKDQVFINHG WQYFRTVVRKFS  
**PKS1-*Metarhizium anisopliae*** DEGNFRCNPMWVDS CGQLAGFLMNGHAKT - PKDQVFINHG WQYFRTVVRKFS  
**PKS1-*Metarhizium brunneum*** DEGNFRCNPMWVDS CGQLAGFLMNGHAKT - PKDQVFINHG WQYFRTVVRKFS  
**PKS1-*Metarhizium guizhouense*** DEGNFRCNPMWVDS CGQLAGFLMNGHAKT - PKDQVFINHG WQSFRTVVRKFS  
**PKS1-*Metarhizium majus*** DEGNFRCNPMWVDS CGQLAGFLMNGHAKT - PKDQVFINHG WQSFRTVVRKFS  
**PKS1-*Metarhizium acridum*** DEGNFRCNPMWVDS CGQLAGFLMNGHAKT - PKDQVFINHG WQSFRTVVRKLS  
**PKS1-*Metarhizium album*** DEGNFRCNPMWVDS CGQLAGFLMNGHAKT - PLDQVFINHG WQSFRTVVRKFC  
**PKS-*Trichoderma reesei*** DEGSFHCNPMWIDS CGQLAGFLMNGHAKT - PKDQVFINHG WQSFMRVVRKFR  
**PKS-*Colletotrichum fioriniae*** PRGGFYCNPLWIDS CGQTTGFLMNCHQTT - PRDYVYVNHG WKSMKLAQDFQ  
**PKS-*Fusarium graminearum*** PSGGFVCNPMWIDS CGQTTGFMNCHQTT - PNDYVYVNHG WKSMRLAKAFR  
**PKS2-*Metarhizium robertsii*** KKGDFDCNPMWIDS FQGTLGFLMNGHDFT - GKDEVFINHG WRSMRCAKPF  
**PKS2-*Metarhizium anisopliae*** EKGDFDCNPMWIDS FQGTLGFLMNGHDFT - GKDEVFINHG WRSMRCAKPF  
**PKS2-*Metarhizium brunneum*** EKGDFDCNPMWIDS FQGTLGFLMNGHDFT - GKDEVFINHG WRSMRCAKPF  
**PKS2-*Metarhizium guizhouense*** EKGDFGCNPMWIDS FQGTLGFLMNGHDFT - GKDEVFINHG WRSMRCAKPF  
**PKS2-*Metarhizium majus*** ERGDFDCNPMWIDS FQGTLGFLMNGHDFT - GKDEVFINHG WRSMRCAKPF  
**PKS2-*Metarhizium acridum*** EKEDFDYNPMWIDS FQGTLGFLMNGHDFT - EKDVFINHG WRSMRCAKQFR  
**PKS-*Talaromyces marneffeii*** EAANFHRNPFWIDS IGHITGFTMNANDATDSANFVYVNHG WDSMRCLTKFS  
**PKS-*Penicillium oxalicum*** SPGNFHRNPFWIDS FGHLSGFIMNASDATDSKNQVYVNHG WDSMRCLKKFD  
**PKS-*Aspergillus fumigatus*** PPGNFHRNPFWIDS FGHLSGFIMNASDATDSKNQVYVNHG WDSMRCLKKFS  
**PKS-*Aspergillus clavatus*** PAGNFHRNPFWIDS FGHLSGFIMNASDATDSKNQVYVNHG WDSMRCLKKFS

**PKS1-*Metarhizium robertsii*** RDKTYRITYVRMRCVEGTTYAGDVYIFD-DEGIV-----  
**PKS1-*Metarhizium anisopliae*** RDKTYRITYVRMRCVEGTTYAGDVYIFD-DEGIV-----  
**PKS1-*Metarhizium brunneum*** RDKTYRITYVRMRCVEGTTYAGDVYIFD-DDGIV-----  
**PKS1-*Metarhizium guizhouense*** KDKTYRITYVRMRCIEGTTYAGDVYIFD-DEGIV-----  
**PKS1-*Metarhizium majus*** KDKTYRITYVRMRCIEGTTYAGDVYIFD-DEGIV-----  
**PKS1-*Metarhizium acridum*** KDKTYRITYVRMRCIEGTTYAGDVYIFD-NEGIV-----  
**PKS1-*Metarhizium album*** KDKTYRITYVRMRCIEGTTYAGDVYIFD-DEGIV-----  
**PKS-*Trichoderma reesei*** KDQTYRITYVRMRPVEGTLYAGDVYIFD-DDGIV-----  
**PKS-*Colletotrichum fioriniae*** EGTTYRITFIHMRPVDGTYAGDLYILDENSTVIGVYGDITFQGLPRRV  
**PKS-*Fusarium graminearum*** EDGTYRITYIRMRPIDSTKFAGDLYILDEDDTVGVYGDITFQGLPRRV  
**PKS2-*Metarhizium robertsii*** KDAVYRITYIRMQHVEKTKYRGDLYIE-DGVIIVAVFGGMTF-----  
**PKS2-*Metarhizium anisopliae*** KDAVYRITYIRMQHVEKTKYRGDLYIE-DGVIIVAVFGGMTF-----  
**PKS2-*Metarhizium brunneum*** KDAVYRITYIRMQHVEKTKYRGDLYIE-DGVIIVAVFGGMTF-----  
**PKS2-*Metarhizium guizhouense*** KDAVYRITYIRMQHVEKTKYRGDLYIE-DGVIIGVFGGMTF-----  
**PKS2-*Metarhizium majus*** KDAVYRITYIRMQHVEKTKYRGDLYIE-DGVVIIVAVFGGMTFL-----  
**PKS2-*Metarhizium acridum*** KDAVYRITYICMQNVDKTKYCGDLYIE-DGVIIVAVFGGMTVLP-----  
**PKS-*Talaromyces marneffeii*** ADATYRITYVRMQWQGTIYSGDVYVFE-KDEIIAVYGGVKFQGVPRKI  
**PKS-*Penicillium oxalicum*** PNVTYRITYVRMQPWQNAIFAGDVYVFD-GDDIIVAVYGGVQFQALSRI  
**PKS-*Aspergillus fumigatus*** GDATYQTYVKMQPWKDSIWAGDVYVFE-GDDIIVAVYGGVQFQALARKI  
**PKS-*Aspergillus clavatus*** ADATYQTYVKMQPWRDSIWAGDVYVFE-GDDIIVAVYGGVQFQALARKI

## Alignment of TE domain

**PKS1-*Metarhizium robertsii*** TLFLLPDGSGS SFSYAPI-NAVRK--DVCVFG LNCPWLKSAEKL VQFG--  
**PKS1-*Metarhizium anisopliae*** TLFLLPDGSGS SFSYAPI-NAVRK--DVCVFG LNCPWLKSAEKL VQFG--  
**PKS1-*Metarhizium brunneum*** TLFLLPDGSGS SFSYAPI-NAVRK--DVCVFG LNCPWLKSAEKL VQFG--  
**PKS1-*Metarhizium guizhouense*** TLFLLPDGSGS SFSYAPI-NAVRK--DVCVFG LNCPWLKSAEKL VQFG--  
**PKS1-*Metarhizium majus*** TLFLLPDGSGS SFSYAPI-NAVRK--DVCVFG LNCPWLKSAEKL VQFG--  
**PKS1-*Metarhizium acridum*** TLFLLPDGSGS SFSYAPI-NAVRK--DVCVYGLNCPWLKSAEKL VQFG--  
**PKS1-*Metarhizium album*** TLFLLPDGSGSATS YATI-SAVGR--DICVYGLNCPWLKSAEKL VQFG--  
**PKS-*Trichoderma reesei*** TLFLLPDGSGSATSYASL-PPISPNGDI AVYGLNCPWLKDAQHL VEFG--  
**PKS-*Colletotrichum fiorinia*** TLFLLPDGSGSATSYAPI-NAIGK--EVCVYGLT CPWLKSAADKL VQFG--  
**PKS-*Fusarium graminearum*** TLFLLPDGSGSATSYASL-PPISPDGDVA VYGLNCPWLKDASYL VEFG--  
**PKS2-*Metarhizium robertsii*** ILVLF PDGSGSAASYGALAPKIRR--DIAVYALNCPWRTNGEE IRLRGVT  
**PKS2-*Metarhizium anisopliae*** ILVLF PDGSGSAASYGALAPKIRR--DIAVYALNCPWRTNGEE IRLRGVT  
**PKS2-*Metarhizium brunneum*** ILVLF PDGSGSAASYGALAPKIRR--DIAVYALNCPWRTNGEE IRLRGVT  
**PKS2-*Metarhizium guizhouense*** ILVLF PDGSGSAASYGALAPKIRR--DIAVYALNCPWRTNGEE IRLRGVS  
**PKS2-*Metarhizium majus*** ILVLF PDGSGSAASYGALAPKIRR--DTAVYALNCPWRTNGEE IRLRGVS  
**PKS2-*Metarhizium acridum*** ILVLF PDGSGSAASYGALAPKIRK--DIAVYALNCPWRTNGEE IRLRGVS  
**PKS-*Talaromyces marneffe*** TLFLFPDGSGS STSYATI-PKISP--DVCVYGLNCPYMKTP EKL-NCA--  
**PKS-*Penicillium oxalicum*** KLFLFPDGSGS ASSYATI-PALSP--DVCVYGLNCPYMKTP QNL-TCS--  
**PKS-*Aspergillus fumigatus*** KLFLFPDGSGS ASSYATI-PALSP--DICVYGLNCPYMKTP QNL-KCS--  
**PKS-*Aspergillus clavatus*** KLFLFPDGSGSATSYATI-PGISP--DVCVYGLNCPYMRTP EKL-NFP--

**PKS1-*Metarhizium robertsii*** LKGLATLYVEE IRR---RAPHGP-----YNLGGWSAGGI **C**AYEAAI  
**PKS1-*Metarhizium anisopliae*** LKGLATLYVEE IRR---RAPHGP-----YNLGGWSAGGI **C**AYEAAI  
**PKS1-*Metarhizium brunneum*** LKGLATLYVEE IRR---RAPHGP-----YNLGGWSAGGI **C**AYEAAI  
**PKS1-*Metarhizium guizhouense*** LKGLATLYVEE IRR---RAPHGP-----YNLGGWSAGGI **C**AYEAAI  
**PKS1-*Metarhizium majus*** LKGLATLYVEE IRR---RAPHGP-----YNLGGWSAGGI **C**AYEAAI  
**PKS1-*Metarhizium acridum*** LKGLATLYVEE IRR---RAPHGP-----YNLGGWSAGGI **C**AYEAAI  
**PKS1-*Metarhizium album*** LKGLASLYVGE IRR---RAPHGP-----YNLGGWSAGGI **C**AYEAAI  
**PKS-*Trichoderma reesei*** LRGLAELYVSE ILLR---RQPRGP-----YDLGGWSAGGI **C**AYEVSL  
**PKS-*Colletotrichum fiorinia*** LKGLAALYVEE IRR---RVPHGP-----YNLGGWSAGGI **C**AYEAAI  
**PKS-*Fusarium graminearum*** LKGLTELYVNE ILLR---RKPQGP-----YNLGGWSAGGI **C**AYEAAI  
**PKS2-*Metarhizium robertsii*** LDQMVAKHLVEVGR ILD SHRHGRPGSANASVGLALGGWSAGGI **L**ALEAVR  
**PKS2-*Metarhizium anisopliae*** LDQMVAKHLVEVGR ILD SHQRGRPGSSNASVGLALGGWSAGGI **L**ALEAVR  
**PKS2-*Metarhizium brunneum*** LDQMVAKHLVEVGR ILD SHRHGRPGSGNSSVGLALGGWSAGGI **L**ALEAVR  
**PKS2-*Metarhizium guizhouense*** LDQMVAKHLVEVGR ILD RHQHCRAGSGNASVGLALGGWSAGGI **L**ALEAVR  
**PKS2-*Metarhizium majus*** LDQMVAKHLVEVGR ILD SHQHGRPGSGNASVGLALGGWSAGGI **L**ALEAVR  
**PKS2-*Metarhizium acridum*** LDQMVAKHLIEVRR ILD NHQQSRL---NGSIDLALGGWSAGGI **L**AIIEGVR  
**PKS-*Talaromyces marneffe*** LQDLTASYVTE IRR---RQPKGP-----YNVGGWSAGGI **C**AYDAVR  
**PKS-*Penicillium oxalicum*** LDELTEPYLAE IRR---RQPKGP-----YSFGGWSAGGI **C**AFDAAR  
**PKS-*Aspergillus fumigatus*** LEELTEPYLAE IRR---RQPTGP-----YNFGGWSAGGI **C**AFDAAR  
**PKS-*Aspergillus clavatus*** LQELTFPYVAE IRR---RQPTGP-----YNFGGWSAGGI **C**AYDAAR

|                                            |                                                |
|--------------------------------------------|------------------------------------------------|
| <b>PKS1-<i>Metarhizium robertsii</i></b>   | QFT-REGETVERLILLDSPNP-----                     |
| <b>PKS1-<i>Metarhizium anisopliae</i></b>  | QFT-REGETVERLILLDSPNP-----                     |
| <b>PKS1-<i>Metarhizium brunneum</i></b>    | QFT-REGETVERLILLDSPNP-----                     |
| <b>PKS1-<i>Metarhizium guizhouense</i></b> | QFT-REGETVERLILLDSPNPI-----                    |
| <b>PKS1-<i>Metarhizium majus</i></b>       | QFT-REGETVERLILLDSPNPI-----                    |
| <b>PKS1-<i>Metarhizium acridum</i></b>     | QFT-REGETVERLILLDSPNPI-----                    |
| <b>PKS1-<i>Metarhizium album</i></b>       | QFT-REGEAVERLILLDSPNP-----                     |
| <b>PKS-<i>Trichoderma reesei</i></b>       | RLT-RDGEKVERLILLDSPNP-----                     |
| <b>PKS-<i>Colletotrichum fioriniae</i></b> | MLT-RAGHRVDRLVLIDSPSE-----                     |
| <b>PKS-<i>Fusarium graminearum</i></b>     | ILT-RAGHQVDRLILIDSPNEVGL-----                  |
| <b>PKS2-<i>Metarhizium robertsii</i></b>   | QLG-EAGVAVQKMVLLDAPNPI-----                    |
| <b>PKS2-<i>Metarhizium anisopliae</i></b>  | QLR-EAGVAVQKMVLLDAPNPI-----                    |
| <b>PKS2-<i>Metarhizium brunneum</i></b>    | QLG-EAGVAVQKMVLLDAPNPI-----                    |
| <b>PKS2-<i>Metarhizium guizhouense</i></b> | QLR-EAGVAVQKMVLLDAPNPI-----                    |
| <b>PKS2-<i>Metarhizium majus</i></b>       | QLR-EAGVAVQKMVLLDAPNPI-----                    |
| <b>PKS2-<i>Metarhizium acridum</i></b>     | QLR-QTGIVVQKLVLLDAPNPI-----                    |
| <b>PKS-<i>Talaromyces marneffei</i></b>    | QLVVEQGETVERIFFLDSPPF-----                     |
| <b>PKS-<i>Penicillium oxalicum</i></b>     | HLIFEEGERVERLLLLDSPFFIG-----                   |
| <b>PKS-<i>Aspergillus fumigatus</i></b>    | QLILEEGEEVERLLLLDSPFFIGLEKLPPRLYKFFNSIGLFGDGKR |
| <b>PKS-<i>Aspergillus clavatus</i></b>     | QLILEEGEVVERLLLLDSPFFIG-----                   |
