# Supplementary material for: Duplication of a Pks gene cluster and subsequent functional diversification facilitate environmental adaptation in Metarhizium species
Source: PubMed Central journal article supplement (PMC6042797; doi:10.1371/journal.pgen.1007472), 2018-06-29
Supplement: pgen.1007472.s033.pdf [file pgen.1007472.s033.pdf]

## Supplementary dataset 5

Dataset for Figure 4 [include part 1 (motif logos and sequences in each gene) and part 2 (the promoter sequences of *Pks1* and *Pks2* genes)]

### Part 1: Motif logos and motif sequences in each gene

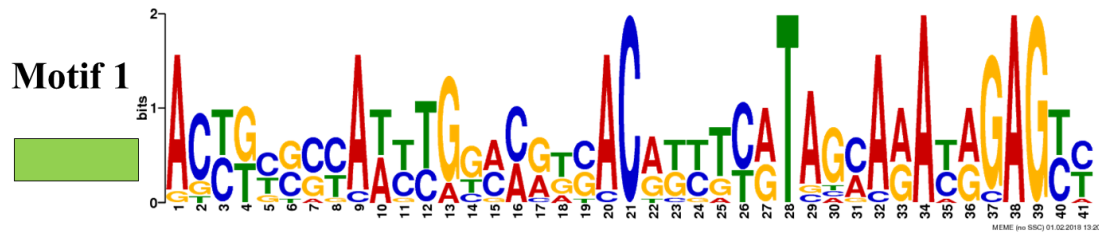

| Gene Name                                  | Sequences                                 |
|--------------------------------------------|-------------------------------------------|
| <b>PKS1</b> <i>Metarhizium anisopliae</i>  | ACTTCGATAATTGTAAAGCACATTCGTAGCAAATAGAGTT  |
| <b>PKS1</b> <i>Metarhizium brunneum</i>    | ACTTTGGTAATTGTAAAGCACATTCGTAGCAAATAGAGTT  |
| <b>PKS1</b> <i>Metarhizium robertsii</i>   | ACTTTGGCAATTGTAAAGCACATTCGTAGCAAATAGAGTT  |
| <b>PKS1</b> <i>Metarhizium guizhouense</i> | ACTTTGCTAATTGCACAACACATCTCGTAGCAAATAGAGTT |
| <b>PKS1</b> <i>Metarhizium majus</i>       | ACTTTGGTAATTGCAACACACATCTCGTAGCAAATAGAGTT |
| <b>PKS1</b> <i>Metarhizium acridum</i>     | AGCGGGCCCATCAGGCGGCCCTGCTCATCAGCAATAGAGCA |
| <b>PKS2</b> <i>Metarhizium acridum</i>     | GTTGGTGGATGCAGAAGTTACATGTCATGTCAAAAACAGTC |
| <b>PKS2</b> <i>Metarhizium guizhouense</i> | ACCGCCCCATCTGGCCGTGACGGTGTATAGAAGACGGAGCC |
| <b>PKS2</b> <i>Metarhizium majus</i>       | ACCGCCCCATCTGGCCGTGACGGTGTATAGAAGACGGAGCC |
| <b>PKS2</b> <i>Metarhizium brunneum</i>    | AGCGCCCCATCCGGCCGTGACGGTGTATACCAGACGGAGCC |
| <b>PKS2</b> <i>Metarhizium robertsii</i>   | ACCGCCCCATCCGGCCGTGACAGCATATAGAAGACGGAGCC |
| <b>PKS2</b> <i>Metarhizium anisopliae</i>  | ACCGCCCCATCTGGCCGTGACGCCTCATAGAAGACGGAGCC |

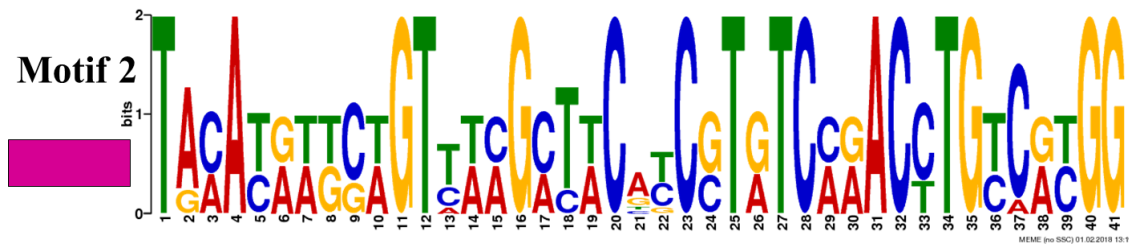

| Gene Name                           | Sequences                                 |
|-------------------------------------|-------------------------------------------|
| <i>PKS1 Metarhizium anisopliae</i>  | TAAACGTGCTGTAAAGATACGTCCTGTCCAACCTGCCACGG |
| <i>PKS1 Metarhizium brunneum</i>    | TAAACGTGGTGTCAAGATACGTCCTATCCAACCTGCCACGG |
| <i>PKS1 Metarhizium robertsii</i>   | TGAACGTGGTGTCAAGATACCTCCTATCCAACCTGCCACGG |
| <i>PKS1 Metarhizium guizhouense</i> | TAAACGTGGTGTCAAGATACTTCCTATCCAACCTGCCACGG |
| <i>PKS2 Metarhizium acridum</i>     | TGCATGTGCTGTAAAGCTACATCGTATCCAACCTGTAACGG |
| <i>PKS2 Metarhizium guizhouense</i> | TACATAATCAGTTTCGCTTCACCGTGTGACACCTGTCGTGG |
| <i>PKS2 Metarhizium majus</i>       | TACATAATCAGTTTCGCTTCACCGTGTGACACCTGTCGTGG |
| <i>PKS2 Metarhizium brunneum</i>    | TACATAATCAGTTTCGCTTCACCGTGTGACACCTGTCGTGG |
| <i>PKS2 Metarhizium robertsii</i>   | TACATAATCAGTTTCGCTTCACCGTGTGACACCTGTCGTGG |
| <i>PKS2 Metarhizium anisopliae</i>  | TACATAATCAGTTTCGCTTCACCGTGTGACACCTGTCGTGG |

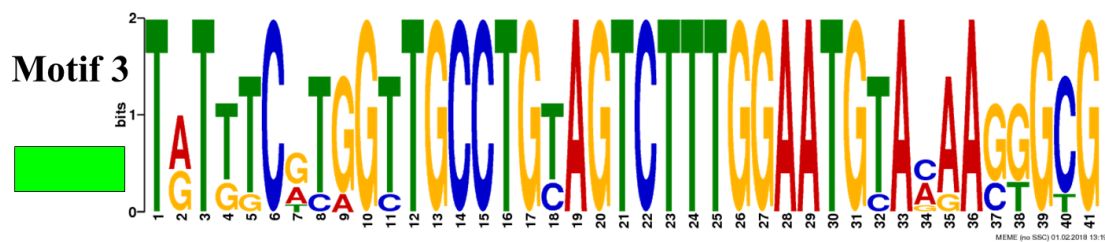

| Gene Name                           | Sequences                                  |
|-------------------------------------|--------------------------------------------|
| <i>PKS1 Metarhizium anisopliae</i>  | TGTTTCGTGGTTGCCTGTAGTCTTTGGAATGTACAAGGGCG  |
| <i>PKS1 Metarhizium brunneum</i>    | TGTTTCGTGGTTGCCTGTAGTCTTTGGAATGTACAAGGGCG  |
| <i>PKS1 Metarhizium robertsii</i>   | TGTTGCGTGGTTGCCTGTAGTCTTTGGAATGTACAAGGGCG  |
| <i>PKS1 Metarhizium guizhouense</i> | TATTTTCATGGTTGCCTGTAGTCTTTGGAATGTAAAAGGGCG |
| <i>PKS1 Metarhizium majus</i>       | TATTTTCATGGTTGCCTGTAGTCTTTGGAATGTAAAAGGGCG |
| <i>PKS1 Metarhizium album</i>       | TATGTCTCAGTTGCCTGCAGTCTTTGGAATGCAAACTGTG   |
| <i>PKS2 Metarhizium acridum</i>     | TATGTCGTGGCTGCCTGCAGTCTTTGGAATGTAGGACTGCG  |

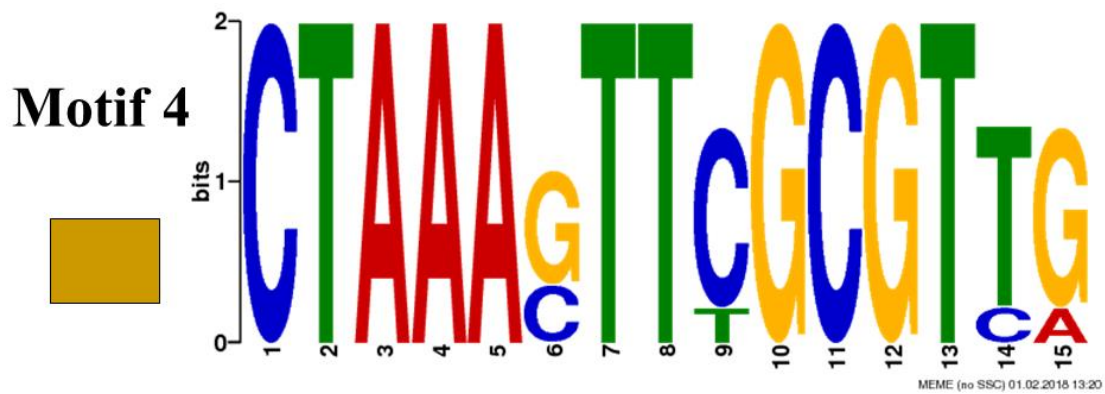

| Gene Name                           | Sequences       |
|-------------------------------------|-----------------|
| <i>PKS1 Metarhizium anisopliae</i>  | CTAAAGTTCGCGTTG |
| <i>PKS1 Metarhizium brunneum</i>    | CTAAAGTTCGCGTTG |
| <i>PKS1 Metarhizium robertsii</i>   | CTAAAGTTCGCGTTG |
| <i>PKS1 Metarhizium guizhouense</i> | CTAAACTTCGCGTTG |
| <i>PKS1 Metarhizium majus</i>       | CTAAAGTTCGCGTTG |
| <i>PKS2 Metarhizium acridum</i>     | CTAAACTTTGCGTCA |

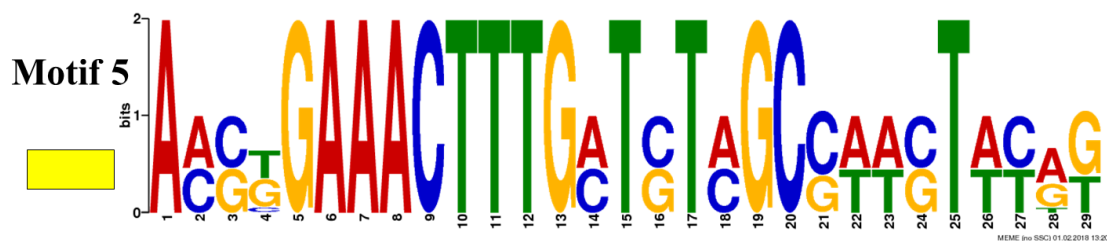

| Gene Name                           | Sequences                      |
|-------------------------------------|--------------------------------|
| <i>PKS1 Metarhizium anisopliae</i>  | AAGGGAACTTTGATCTAGCCAACACTACAG |
| <i>PKS1 Metarhizium brunneum</i>    | AAGGGAACTTTGATCTAGCCAACACTACAG |
| <i>PKS1 Metarhizium robertsii</i>   | AAGGGAACTTTGATCTAGCCAACACTACAG |
| <i>PKS1 Metarhizium guizhouense</i> | AAGGGAACTTTGATCTAGCCAACACTACAG |
| <i>PKS1 Metarhizium majus</i>       | AAGGGAACTTTGATCTAGCCAACACTACAG |
| <i>PKS2 Metarhizium acridum</i>     | AACCGAACTTTGATCTAGCCAACACTACAG |
| <i>PKS2 Metarhizium guizhouense</i> | ACCTGAACTTTGCTGTCGCGTTGTTTGT   |
| <i>PKS2 Metarhizium majus</i>       | ACCTGAACTTTGCTGTCGCCTTGTTTGT   |
| <i>PKS2 Metarhizium brunneum</i>    | ACCTGAACTTTGCTGTCGCGTTGTTTGT   |
| <i>PKS2 Metarhizium robertsii</i>   | ACCTGAACTTTGCTGTCGCGTTGTTTGT   |
| <i>PKS2 Metarhizium anisopliae</i>  | ACCTGAACTTTGCTGTCGCGTTGTTTTG   |

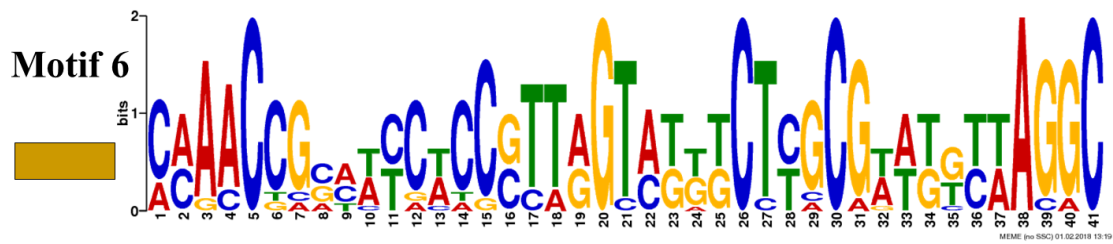

| Gene Name                           | Sequences                                  |
|-------------------------------------|--------------------------------------------|
| <i>PKS1 Metarhizium anisopliae</i>  | CAAACCGGTATCACCCTTAGTATGTCTCGCGAATGTTAGGC  |
| <i>PKS1 Metarhizium brunneum</i>    | CAAACCGGAATCACCCTTAGTATGTCTTGCGAATTTTAGGC  |
| <i>PKS1 Metarhizium robertsii</i>   | CAAACCGGAATCACCCTTAGCATGTCTTGCGAATTTTAGGC  |
| <i>PKS1 Metarhizium guizhouense</i> | AAAACCGAAATCACCCCTAGTATGTCTTGCGAATTTTAGGC  |
| <i>PKS1 Metarhizium majus</i>       | AAACCGAAATCACCCCTAGTATGTCTTGCGAATTTTACGC   |
| <i>PKS2 Metarhizium acridum</i>     | AAAACCGGAATCAACGTTAGTATATCTTGCGAGATCTTAGAC |
| <i>PKS2 Metarhizium guizhouense</i> | CCAACCGCCTCCTCCGTTGGTCGTGCCACGTTGGCAAGGC   |
| <i>PKS2 Metarhizium majus</i>       | CCAACCGCCTCCTCCGTTGGTCGTGCTCGCGTTGGCAAGGC  |
| <i>PKS2 Metarhizium brunneum</i>    | CCGCTCCTCCGTTGGTTGGTAGTGCTCCGTTGGCAAGGC    |
| <i>PKS2 Metarhizium robertsii</i>   | CCAACCGCCTCCTCCGTAGGTCGTGCTCGCGTTGGCAAGGC  |
| <i>PKS2 Metarhizium anisopliae</i>  | CCAACCGCCTCCTCCGTAGGTCGTGCTCGCGTTGGCAAGGC  |

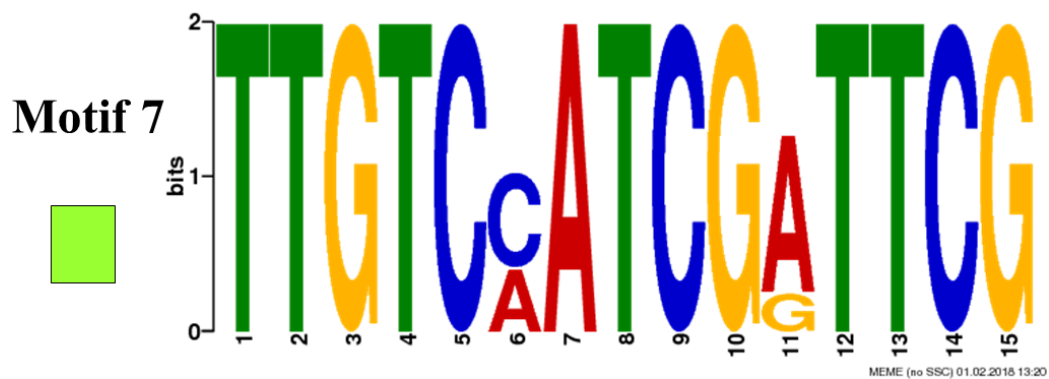

| Gene Name                           | Sequences        |
|-------------------------------------|------------------|
| <i>PKS1 Metarhizium anisopliae</i>  | TTGTCCATCGGTTTCG |
| <i>PKS1 Metarhizium brunneum</i>    | TTGTCCATCGATTTCG |
| <i>PKS1 Metarhizium robertsii</i>   | TTGTCCATCGATTTCG |
| <i>PKS1 Metarhizium guizhouense</i> | TTGTCAATCGATTTCG |
| <i>PKS1 Metarhizium majus</i>       | TTGTCAATCGATTTCG |

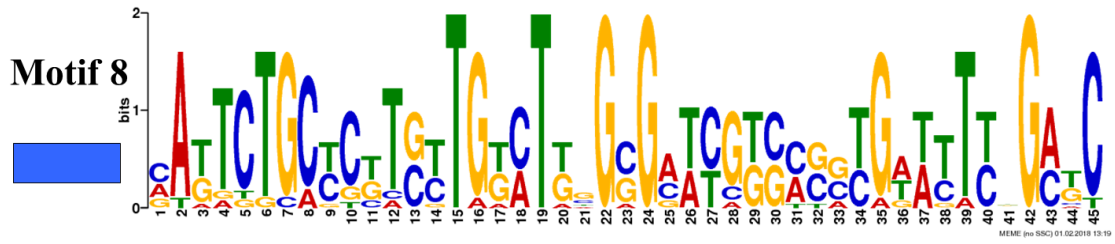

| Gene Name                           | Sequences                                       |
|-------------------------------------|-------------------------------------------------|
| <i>PKS1 Metarhizium anisopliae</i>  | GATTCTGCCCCTGTTATCTTGGCGATCGTGCCGTGAACTTGGATC   |
| <i>PKS1 Metarhizium brunneum</i>    | GATTCTGCCCCTGTTGTCTTGGCGATCGTGCCGTGAACTTGGATC   |
| <i>PKS1 Metarhizium robertsii</i>   | GATTCTGCCCCTGTTGTCTTGGCGATCGTGCCGTGATCTTGGATC   |
| <i>PKS1 Metarhizium guizhouense</i> | AATTCTGCCCCTGTTGTCTTAGCGATCGTGCCGTGAATTTTCGATC  |
| <i>PKS1 Metarhizium majus</i>       | AATTCTGCCCCTGTTGTCTTGGCGATCGTGCCGTGAATTTTCGATC  |
| <i>PKS1 Metarhizium acridum</i>     | AAAAC TGATGCAGTTGGCTTGGAGGTCCGCTGATAGTGA CTGAAT |
| <i>PKS1 Metarhizium album</i>       | CATGGTGCGGCTCCTGACTAGGCGGTCATCCCATGGACTTGGACC   |
| <i>PKS2 Metarhizium acridum</i>     | ATTTTGCACTTGTGTCTGAGCGATCCTGCTGTGAATTTTCGATC    |
| <i>PKS2 Metarhizium guizhouense</i> | CAGTCTGCTCGTCTGGATGCGGGCATGGCAGCCGTTTTCTGCGC    |
| <i>PKS2 Metarhizium majus</i>       | CAGTCTGCTCGCCCTGGATGCGGGAATGGCAGCCGTTTTCTGCGC   |
| <i>PKS2 Metarhizium brunneum</i>    | CAGTCTGCTCGTCTGGATGCGGGCATGGCAGCCGTTTTCTGCGC    |
| <i>PKS2 Metarhizium robertsii</i>   | CAGTCTGCTCGTCTGGATGTGGGCATGGCAGCCGTTTTCTGCGC    |
| <i>PKS2 Metarhizium anisopliae</i>  | CAGTCTGCTCGTCTGGATGTGGGCATGGCAGCCGTTTTCTGCGC    |

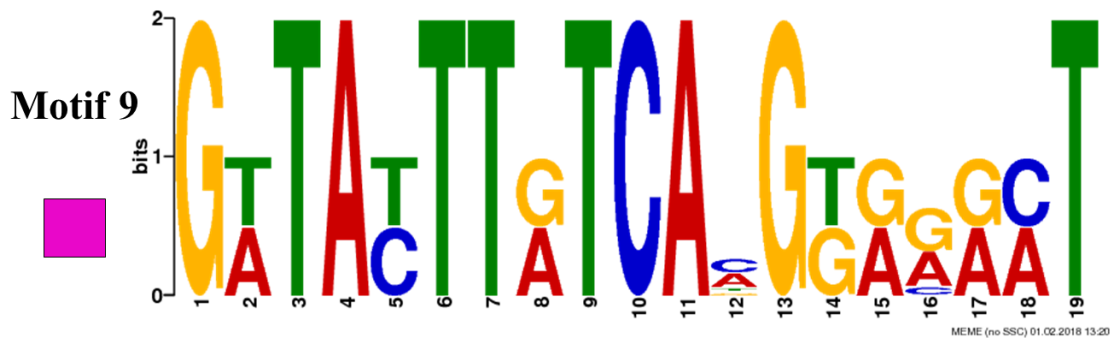

| Gene Name                           | Sequences           |
|-------------------------------------|---------------------|
| <i>PKS1 Metarhizium anisopliae</i>  | GTTACTTGTCACGTAGAAT |
| <i>PKS1 Metarhizium brunneum</i>    | GTTACTTGTCACGTAGAAT |
| <i>PKS1 Metarhizium robertsii</i>   | GTTACTTGTCACGTAGAAT |
| <i>PKS1 Metarhizium guizhouense</i> | GTTACTTGTCATGTAGAAT |
| <i>PKS1 Metarhizium majus</i>       | GTTACTTGTCACGTAGAAT |
| <i>PKS2 Metarhizium guizhouense</i> | GATATTTATCAAGGGAGCT |
| <i>PKS2 Metarhizium majus</i>       | GATATTTATCAGGGGCGCT |
| <i>PKS2 Metarhizium brunneum</i>    | GATATTTATCAAGGGAGCT |
| <i>PKS2 Metarhizium robertsii</i>   | GATATTTATCAAGGGAGCT |
| <i>PKS2 Metarhizium anisopliae</i>  | GATATTTATCAAGGGAGCT |

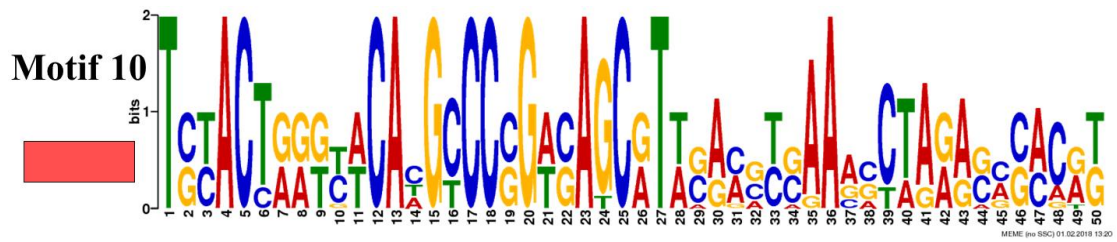

| Gene Name                           | Sequences                                           |
|-------------------------------------|-----------------------------------------------------|
| <i>PKS1 Metarhizium anisopliae</i>  | TCTACTAAGCACAAGCCCCGACAGCGTTGACGCCAAACCTAGACCGACGT  |
| <i>PKS1 Metarhizium brunneum</i>    | TCTACTAAGCACAAGCCCCGACAGCGTTGACGCCAAACCTAGACCGACGT  |
| <i>PKS1 Metarhizium robertsii</i>   | TCTACTAAGCACAAGCCCCGACAGCGTTGACGCCAAACCTAGACCGACGT  |
| <i>PKS1 Metarhizium guizhouense</i> | TCTACTAAGCACATGCCCGACAGCGTTGACGCCAAACCTAGACCGACGT   |
| <i>PKS1 Metarhizium majus</i>       | TCTACCAAGCACATGCCCGACAGCGTTGACGCCAAACCTAGACCGACGT   |
| <i>PKS1 Metarhizium album</i>       | TCTACCGGGGACACGTCCCGACATCGTTAAGCTAAAAGCTAGAAACCGTT  |
| <i>PKS2 Metarhizium guizhouense</i> | TGCACTGGTTTCACGCCCGTGAGCATACAACCTGAAGGCCAAAGGACCCAG |
| <i>PKS2 Metarhizium majus</i>       | TGCACTGGTTTCATGCCCGTGAGCATACAACCTGGAGGCCAAAGGACCCAG |
| <i>PKS2 Metarhizium brunneum</i>    | TGCACTGGTTTCACGCCCGTGAGCATACGACTGAAGGCCAAAGGACCCAG  |
| <i>PKS2 Metarhizium robertsii</i>   | TGCACTGGTTTCACGTCCGGTGAGCATACGAATGAACATTGAAGGCCAAAG |
| <i>PKS2 Metarhizium anisopliae</i>  | TGCACTGGTTTCACGTCCGGTGAGCATACGAATGAACATTGAAGGCCAAAG |

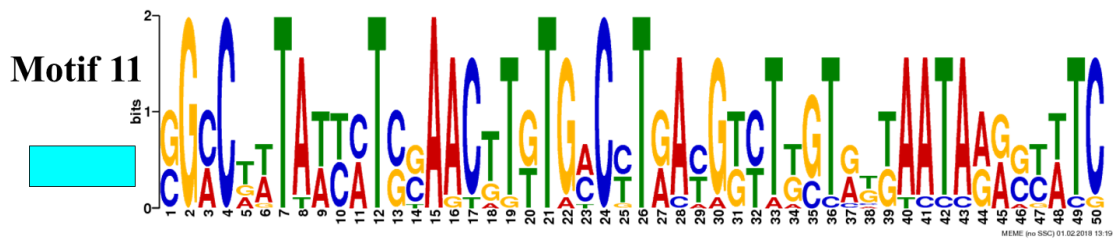

| Gene Name                           | Sequences                                          |
|-------------------------------------|----------------------------------------------------|
| <i>PKS1 Metarhizium anisopliae</i>  | GGCCGTTATTCTCGAACTGTGACCTAACGTCTTGTAGTAATAAAGTTTC  |
| <i>PKS1 Metarhizium brunneum</i>    | GGCCGTTATTCTCGAACTGTGACCTAACGTCTTGTAGTAATAAAGTTTC  |
| <i>PKS1 Metarhizium robertsii</i>   | GGCCGTTATTCTCGAACTGTGACCTAACGTCTTGTAGTAATAAAGTTTC  |
| <i>PKS1 Metarhizium guizhouense</i> | GGCCATTATTCTCGAACGTGTGACCTAACGTCTTCTAGTAATAAAGTTTC |
| <i>PKS1 Metarhizium majus</i>       | GGCCATTATTCTCGAACGTGTGACCTAACGTCTTCCAGTAATAAAGTTTC |
| <i>PKS1 Metarhizium acridum</i>     | GGCCTGTTTCATCTAGTAGGTGTCGTGAAATCAAGTCCTTCCCAGAGACG |
| <i>PKS2 Metarhizium acridum</i>     | GGCCATTATTCTCGAACGTGTAACCTGCCGTCTTCTGATAATAAAGTTTC |
| <i>PKS2 Metarhizium guizhouense</i> | CGACTATAACATGCAACTTTTGCCTTGATGGTTGGTGTGAATAGGCCATC |
| <i>PKS2 Metarhizium majus</i>       | CGACTATAACATGCAACTTTTGCCTTGATGGTTGGTGTGAATAGGCCATC |
| <i>PKS2 Metarhizium brunneum</i>    | CGACTATAACATGCAACTTTTGCCTTGATGGTTGGTGTGAATAGGCCATC |
| <i>PKS2 Metarhizium robertsii</i>   | CGACTATAACATGCAACTTTTGCCTTGATGGTTGGTGTGAATAGGCCATC |
| <i>PKS2 Metarhizium anisopliae</i>  | CGACTATAACATGCAACTTTTGCCTTGATGGTTGGTGTGAATAGGCCATC |

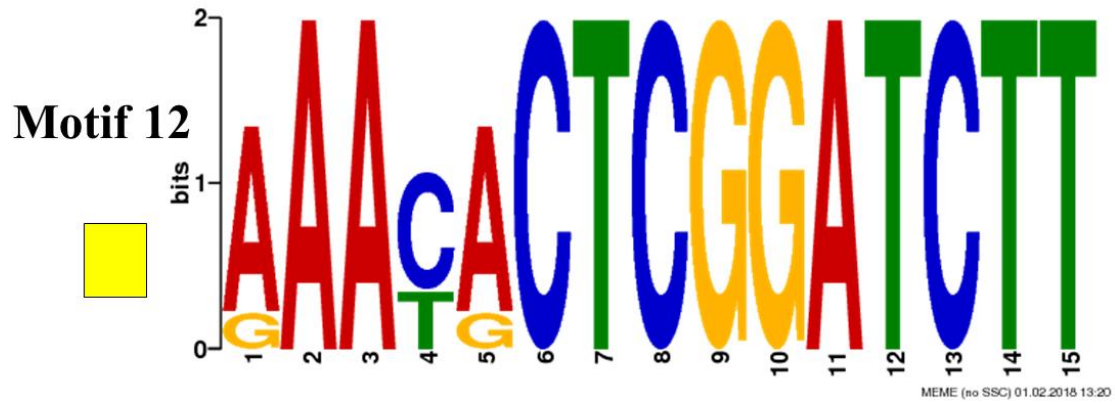

| Gene Name                           | Sequences       |
|-------------------------------------|-----------------|
| <i>PKS1 Metarhizium anisopliae</i>  | AAACACTCGGATCTT |
| <i>PKS1 Metarhizium brunneum</i>    | AAACACTCGGATCTT |
| <i>PKS1 Metarhizium robertsii</i>   | AAACACTCGGATCTT |
| <i>PKS1 Metarhizium guizhouense</i> | AAATACTCGGATCTT |
| <i>PKS1 Metarhizium majus</i>       | AAATACTCGGATCTT |
| <i>PKS2 Metarhizium acridum</i>     | GAACGCTCGGATCTT |

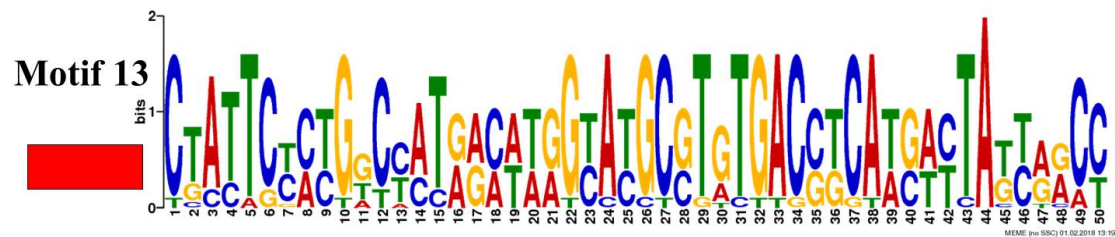

| Gene Name                           | Sequences                                          |
|-------------------------------------|----------------------------------------------------|
| <i>PKS1 Metarhizium anisopliae</i>  | CTATTCCTGGCCATGACATGGTATGCGTGTGACCTCATGATTATTAACC  |
| <i>PKS1 Metarhizium brunneum</i>    | CTATTCCTGGCCATGACATGGTATGCGTGTGACCTCATGATTATTAACC  |
| <i>PKS1 Metarhizium robertsii</i>   | CTATTCCTGGCCATGACATGGTATGCGTGTGACCTCATGATTATTAACC  |
| <i>PKS1 Metarhizium guizhouense</i> | CTATTCCTGGCCCTGAAATGGTATGCGTGTGACCTCATGATTATTAACC  |
| <i>PKS1 Metarhizium majus</i>       | CTATTCCTGGCCCTGAAATGGTATGCGTGTGACCTCATGATTATTAACC  |
| <i>PKS1 Metarhizium acridum</i>     | TCACAGTCTGTTAACGAATTGTCTCCGTTCTTGCTGTTGACCACCACAC  |
| <i>PKS1 Metarhizium album</i>       | CTACTGGCTTGTCCAAAATGGCATGCGGGTGACCTCATGACTATCTGAC  |
| <i>PKS2 Metarhizium acridum</i>     | CTACTCCCTGGCCCTGGAATGGTATGTGTGTGACCTCATGATTATTAACC |
| <i>PKS2 Metarhizium guizhouense</i> | CGATTCTACGTCTATAGCTAAGCACGCCTGTGACGGCAACTCTAGCGGCC |
| <i>PKS2 Metarhizium majus</i>       | CGATTCTACGTCTATAGCTAAGCACGCCTGTGACGGCAACTCTAGCGGCC |
| <i>PKS2 Metarhizium brunneum</i>    | CTCTTCTACGACTATAGCTAAGCACGCCTATGACGGCAACTCTAGCGGCC |
| <i>PKS2 Metarhizium robertsii</i>   | CTCTTCTACGACTATAGCTAAGCACGCCTATGACGGCAACTCTAGCGGCC |
| <i>PKS2 Metarhizium anisopliae</i>  | CGATTCTACGTCTATAGCTAAGCACGCCTATGACGGCAACTCTAGTGGCC |

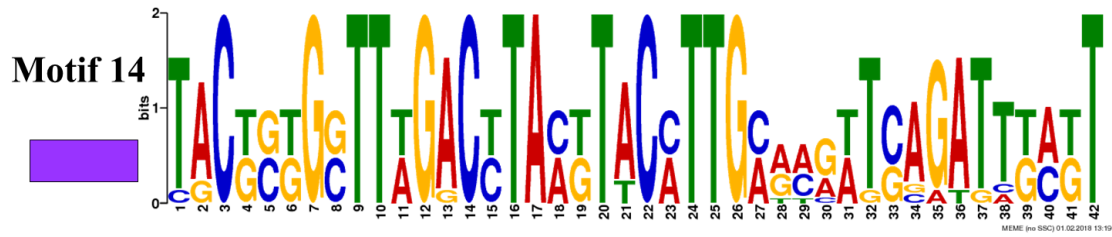

| Gene Name                           | Sequences                                  |
|-------------------------------------|--------------------------------------------|
| <i>PKS1 Metarhizium anisopliae</i>  | TACTCGGGTTGACTTAAGTACATTGAGCAATGAGATTGCTT  |
| <i>PKS1 Metarhizium brunneum</i>    | TACTCGGGTTGACTTAAGTACATTGAGCAATGAGATTGCTT  |
| <i>PKS1 Metarhizium robertsii</i>   | TACTCGGGTTGACTTAAGTACATTGAGCAATGAGATTGCTT  |
| <i>PKS1 Metarhizium guizhouense</i> | TGCTCGGGTTGACTTAAGTACATTGAGCCATGAGATTGCTT  |
| <i>PKS1 Metarhizium majus</i>       | TGCTCGGGTTGACTTAAGTACATTGATTGAGCCATGAGATT  |
| <i>PKS2 Metarhizium guizhouense</i> | TACGGTGCTTAGACCTACTTACCTTGCAAGTTCAGATTTAGT |
| <i>PKS2 Metarhizium majus</i>       | CACGGTGCTTAGACCTACTTACCTTGCAAGTTCAGATTTAGT |
| <i>PKS2 Metarhizium brunneum</i>    | TACGGTGCTTAGACCTACTTACCTTGCAAGTTCGGATCTAGT |
| <i>PKS2 Metarhizium robertsii</i>   | TACGGTGCTTAGACCTACTTTCCTTGCAAGTTCAGATTTAGT |
| <i>PKS2 Metarhizium anisopliae</i>  | TACGGTGCTTAGACCTACTTTCCTTGCAAGTTCAGATTTAGT |

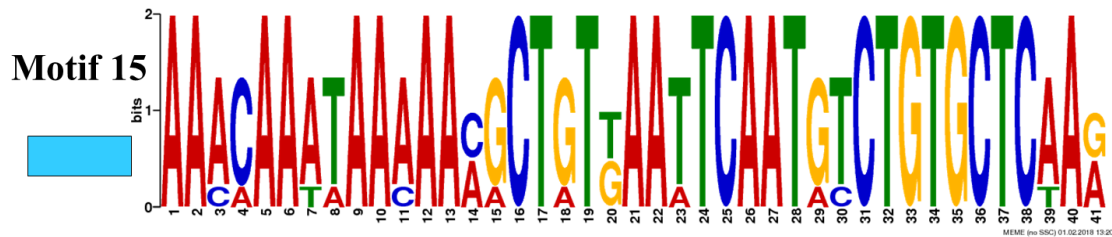

| Gene Name                           | Sequences                                  |
|-------------------------------------|--------------------------------------------|
| <i>PKS1 Metarhizium anisopliae</i>  | AAACAAATAAAAACGCTGTGAATTCAATGTCTGTGCTCAAG  |
| <i>PKS1 Metarhizium brunneum</i>    | AAACAAATAAAAACGCTGTGAATTCAATGTCTGTGCTCAAG  |
| <i>PKS1 Metarhizium robertsii</i>   | AAACAAATAAAAACGCTGTGAATTCAATGTCTGTGCTCAAG  |
| <i>PKS1 Metarhizium guizhouense</i> | AAACAAATAAAAAAGCTGTTAATTCAATGTCTGTGCTCAAA  |
| <i>PKS1 Metarhizium majus</i>       | AACAAATAAAAAAAGCTGTTAATTCAATGCCTGTGCTCAAA  |
| <i>PKS2 Metarhizium acridum</i>     | AAACAAATAACAAAACCTATTAAATCAATATCTGTGCTCTAA |



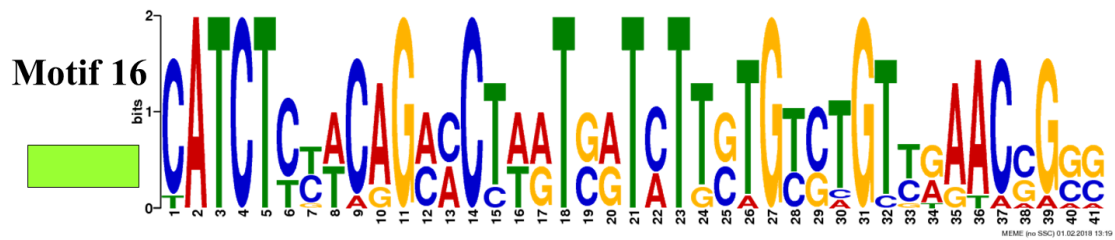

| Gene Name                           | Sequences                                  |
|-------------------------------------|--------------------------------------------|
| <i>PKS1 Metarhizium anisopliae</i>  | CATCTCTACAGACCTAATGATCTTGTGTCTGTTGAACCGGG  |
| <i>PKS1 Metarhizium brunneum</i>    | CATCTCTACAGACCTAATGATCTTGTGTCTGTTGAACCGGG  |
| <i>PKS1 Metarhizium robertsii</i>   | CATCTCTACAGACCTAATGATCTTGTGTCTGTTGAACCGGG  |
| <i>PKS1 Metarhizium guizhouense</i> | CATCTTTACAGACCTAATGATCTTGTGTCTGTTGAACCGGG  |
| <i>PKS1 Metarhizium majus</i>       | CATCTTTACGGACCCAATGATCTTGTGTCTGTTGAACCGGG  |
| <i>PKS2 Metarhizium acridum</i>     | TATCTTCAAGGACCTAATGATCTTGAGTCCGTTGGACCGGA  |
| <i>PKS2 Metarhizium guizhouense</i> | CATCTCCTCAGCACTTGTTCGTATGCTGCGTGTCAAAGGCC  |
| <i>PKS2 Metarhizium majus</i>       | CATCTCCTCAGCACCTGTCGTCTGCTGCCAGCGTGTCAAAG  |
| <i>PKS2 Metarhizium brunneum</i>    | CATCTCGTCAGCACTTGTTCGTATTCTGCGTGTCAAACGGCC |
| <i>PKS2 Metarhizium robertsii</i>   | CATCTCCTCAGCACTTGTTCGTATTCTGTGTGTCAAACGGCC |
| <i>PKS2 Metarhizium anisopliae</i>  | CATCTCCTCAGCACTTGTTCGTATTCTGCGTGTCAAACGGCC |

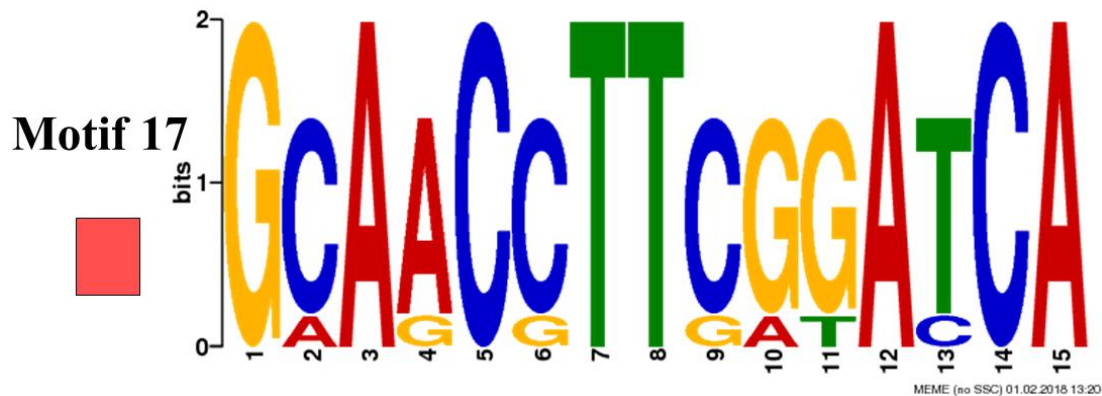

| Gene Name                           | Sequences        |
|-------------------------------------|------------------|
| <i>PKS1 Metarhizium anisopliae</i>  | GCAACCTTCGGATCA  |
| <i>PKS1 Metarhizium brunneum</i>    | GCAGCCTTCGGATCA  |
| <i>PKS1 Metarhizium robertsii</i>   | GCAACCTTCGGATCA  |
| <i>PKS1 Metarhizium guizhouense</i> | GCAACCTTCGGATCA  |
| <i>PKS1 Metarhizium majus</i>       | GCAACCTTCGGATCA  |
| <i>PKS1 Metarhizium album</i>       | GAAACCTTGGTACCA  |
| <i>PKS2 Metarhizium acridum</i>     | GCAACGTTTCAGATCA |

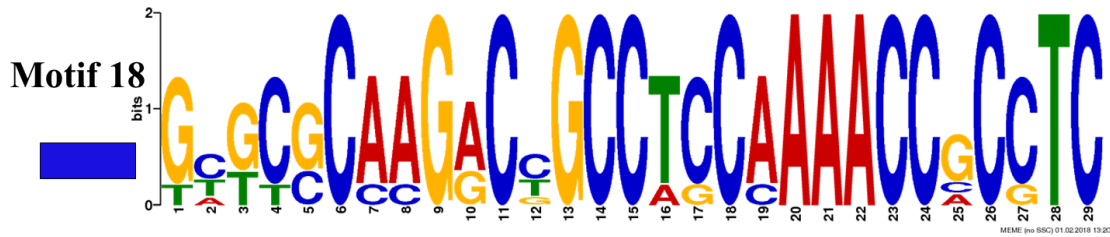

| Gene Name                           | Sequences                     |
|-------------------------------------|-------------------------------|
| <i>PKS1 Metarhizium album</i>       | TCTTCCCCGACGGCCAGCCAAACCCCGTC |
| <i>PKS2 Metarhizium guizhouense</i> | GTGCGCAAGACTGCCTCCAAAACCGCCTC |
| <i>PKS2 Metarhizium majus</i>       | GTGCGCAAGACTGCCTCCAAAACCGCCTC |
| <i>PKS2 Metarhizium brunneum</i>    | GAGCCAAGACCGCCTCCAAAACCACCTC  |
| <i>PKS2 Metarhizium robertsii</i>   | GCGCGCAAGGCCGCCTCCAAAACCGCCTC |
| <i>PKS2 Metarhizium anisopliae</i>  | GCTCGCAAGGCCGCCTCCAAAACCGCCTC |

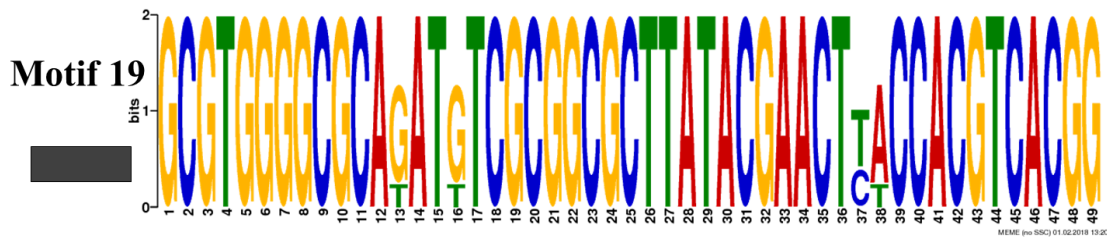

| Gene Name                           | Sequences                                         |
|-------------------------------------|---------------------------------------------------|
| <i>PKS2 Metarhizium guizhouense</i> | GCGTGGGGCGCAGATGTCGGGGCGCTTATACGAACTTACCACGTCACGG |
| <i>PKS2 Metarhizium majus</i>       | GCGTGGGGCGCATATGTCGGGGCGCTTATACGAACTTACCACGTCACGG |
| <i>PKS2 Metarhizium brunneum</i>    | GCGTGGGGCGCAGATTTTCGGGGCGCTTATACGAACTTTCACGTCACGG |
| <i>PKS2 Metarhizium robertsii</i>   | GCGTGGGGCGCAGATGTCGGGGCGCTTATACGAACTCACCACGTCACGG |
| <i>PKS2 Metarhizium anisopliae</i>  | GCGTGGGGCGCAGATGTCGGGGCGCTTATACGAACTCACCACGTCACGG |

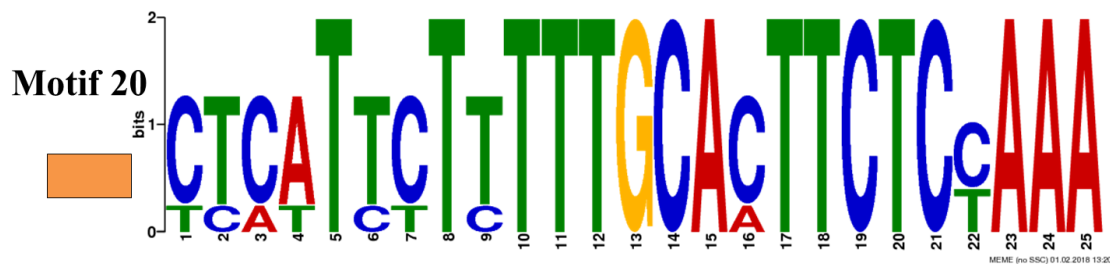

| Gene Name                           | Sequences                  |
|-------------------------------------|----------------------------|
| <i>PKS2 Metarhizium guizhouense</i> | CTCATTCTTTTGGCACTTCTCCAAA  |
| <i>PKS2 Metarhizium majus</i>       | TCATTCTTCTTTGGCACTTCTCCAAA |
| <i>PKS2 Metarhizium brunneum</i>    | CTCATTCTTTTGGCACTTCTCTAAA  |
| <i>PKS2 Metarhizium robertsii</i>   | CTCATTCTTTTGGCACTTCTCTAAA  |
| <i>PKS2 Metarhizium anisopliae</i>  | CTCATTCTTTTGGCAATTCTCCAAA  |

## **Part 2: Promoter sequences of *Pks1* and *Pks2* genes**

### **>MAA\_PKS1 [Metarhizium robertsii ARSEF 23]**

GCAAGTTTACTTTGGCAATTGTAAAGCACATTTCTAGCAAATAGAGTTTGAACGTGGTGTCAAGATACCTC  
CTATCCAACCTGCCACGGTGTGCTTGTGTTGCGTGGTTGCCTGTAGTCTTTGGAATGTACAAGGGCGCTA  
AAGTTCGCGTTGGACAAGGGAAACTTTGATCTAGCCAACTACAGCAAACCGGAATCACCTTAGCATGTCTT  
GCGAATTTTAGGCTATTGTCCATCGATTCTGATTCTGCCCTTGTGCTTGGCGATCGTGCCGTGATCTTGGG  
TCCATTCTACGTGACAAGTAACTTCTGCTATCTACTAAGCACAAGCCCCGACAGCGTTGACGCCAAACCTAGA  
CCGACGTTCCAGGCCGTTATTCTCGAACTTGTGACCTAACGTCTTGTAGTAATAAAGTTTCAAACACTCGGAT  
CTTACTATTCCCTGGCCATGACATGGTATGCGTGTGACCTCATGATTATTAAGTGTGACCACTTGGTAAGCAAT  
CTCATTGCTCAATGTACTTAAGTCAAACCCGAGTAAAACAAATAAAAACGCTGTGAATTCAATGTCTGTGCTC  
AAGCATCTCTACAGACCTAATGATCTTGTGTCTGTTGAACCGGGTGCAACCTTCGGATCAAC

### **>MAN\_PKS1 [Metarhizium anisopliae ARSEF 549]**

GCAAGTTTACTTCGATAATTGTAAAGCACATTTCTAGCAAATAGAGTTTAAACGTGCTGTAAAGATACGTCC  
TGTCCAACCTGCCACGGTGTGCTTGTGTTTCGTGGTTGCCTGTAGTCTTTGGAATGTACAAGGGCGCTAA  
AGTTCGCGTTGGACAAGGGAAACTTTGATCTAGCCAACTACAGCAAACCGGTATCACCTTAGTATGTCTCG  
CGAATGTTAGGCTATTGTCCATCGTTCTGTGATTCTGCCCTTGTATCTTGGCGATCGTGCCGTGAACCTGGAT  
CCATTCTACGTGACAAGTAACTTCTGCCATCTACTAAGCACAAGCCCCGACAGCGTTGACGCCAAACCTAGA  
CCGACGTTCCAGGCCGTTATTCTCGAACTTGTGACCTAACGTCTTGTAGTAATAAAGTTTCAAACACTCGGAT  
CTTACTATTCCCTGGCCATGACATGGTATGCGTGTGACCTCATGATTATTAACCGTGACCACTTGGTAAGCAAT  
CTCATTGCTCAATGTACTTAAGTCAAACCCGAGTAAAACAAATAAAAACGCTGTGAATTCAATGTCTGTGCTC  
AAGCATCTCTACAGACCTAATGATCTTGTGTCTGTTGAACCGGGTGCAACCTTCGGATCAAC

### **>MBR\_PKS1 [Metarhizium brunneum ARSEF 3297]**

GCAAGTTTACTTTGGTAATTGTAAAGCACATTTCTAGCAAATAGAGTTTAAACGTGGTGTCAAGATACGTCC  
TATCCAACCTGCCACGGTGTGCTTGTGTTTCGTGGTTGCCTGTAGTCTTTGGAATGTACAAGGGCGCTAA  
AGTTCGCGTTGGACAAGGGAAACTTTGATCTAGCCAACTACAGCAAACCGGAATCACCTTAGTATGTCTTG  
CGAATTTTAGGCTATTGTCCATCGATTCTGATTCTGCCCTTGTGCTTGGCGATCGTGCCGTGAACCTGGAT  
CCATTCTACGTGACAAGTAACTTCTGCTATCTACTAAGCACAAGCCCCGACAGCGTTGACGCCAAACCTAGA  
CCGACGTTCCAGGCCGTTATTCTCGAACTTGTGACCTAACGTCTTGTAGTAATAAAGTTTCAAACACTCGGAT  
CTTACTATTCCCTGGCCATGACATGGTATGCGTGTGACCTCATGATTATTAACCGTGACCACTTGGTAAGCAAT  
CTCATTGCTCAATGTACTTAAGCCAAACCCGAGTAAAACAAATAAAAACGCTGTGAATTCAATGTCTGTGCTC  
AAGCATCTCTACAGACCTAATGATCTTGTGTCTGTTGAACCGGGTGCAACCTTCGGATCAAC

### **>MGU\_PKS1 [Metarhizium guizhouense ARSEF 977]**

CAAGTTTACTTTGCTAATTGCACAACACATCTCGTAGCAAATAGAGTTTAAACGTGGTGTCAAGATACTTCCTA  
TCCAACCTGCCACGGTGTGCTTACTTATTTTCATGGTTGCCTGTAGTCTTTGGAATGTAAAAGGGCGCTAACT  
TCGCGTTGGATAAAGGGAAACTTTGATCTAGCCAACTACAGAAAACCGAAATCACCCCTAGTATGTCTTGGC  
AATTTTAGGCTATTGTCAATCGATTTCGAATTCTGCCCTTGTGCTTACGATCGTGCCGTGAATTCGATCC  
ATTCTACATGACAAGTAACTTCTGCATCTACTAAGCACATGCCCCGACAGCGTTGACGCCAAACCTAGACCGA  
CGTTCCAGGCCATTATTCTCGAACGTGTGACCTAACGTCTTCTAGTAATAAAGTTTCAAATACTCGGATCTTAC  
TATCCCTGGCCCTGAAATGGTATGCGTGTGACCTCATGATTATTAAGTGTGACCGGCCAGAGGGTAAGCAATCTC

ATGGCTCAATGTAAGTCAAACCCGAGCAAACAAATAAAAAAGCTGTTAATTCAATGTCTGTGCTCAA  
CATCTTTACAGACCTAATGATCTTGTGTCTGTTGAACCGGGTGCAACCTTCGGATCAAC

**>MAJ\_PKS1 [Metarhizium majus ARSEF 297]**

AGAGCACTCAAATCATAGCGTGGCAATAAAGCTTCCAGCAAGTTTACTTTGGTAATTGCAACACACATCTCGT  
AGCAAATAGAGTTTTAAACATATTTTCATGGTTGCTGTAGTCTTTGGAATGTAAAAGGGCGCTAAAGTTCCG  
GTTGGATAAAGGGAAACTTTGATCTAGCCAACCTACAGAAAACCGAAATCACCCCTAGTATGTCTTGCGAAT  
TTTACGCTATTGTCAATCGATTTCGAATTCTGCCCTTGTGTCTTGGCGATCGTGCCGTGAATTCGATCCATT  
CTACGTGACAAGTAACCTTCTGCATCTACCAAGCACATGCCCCGACAGCGTTGACGCCAACCTAGACCGACG  
TTCCAGGCCATTATTCTCGAACGTGTGACCTAACGTCTTCCAGTAATAAAGTTTCAAATACTCGGATCTTACTA  
TTCCCTGGCCCTGAAATGGTATGCGTGTGACCTCATGATTATTAAGTCCACCAGAAGGGTAAGCAATCTCAT  
GGCTCAATCAATGTAAGTCAAACCCGAGCAAACAAATAAAAAAGCTGTTAATTCAATGCCTGTGCT  
CAAACATCTTACGGACCCAATGATCTTGTGTCTGTTGAACCGGGTGCAACCTTCGGATCAAC

**>MAC\_PKS1 [Metarhizium acridum CQMa 102]**

CAAAACAAATCACATCTTGAAGCAAACAGAGTTTGCATGTGCTGTTAAGCTACATCGTATCCAACCTGTAACG  
GTGTGCTTACTTATGTCGTGGCTGCCTGCAGTCTTTGGAATGTAGGACTGCGCTAAACTTTGCGTCAGATAAC  
CGAAACTTTGATCTAGCCAACCTACAGAAAACCGGAATCAACGTTAGTATATCTTGCAGATCTTAGACCATTCT  
GAATTGCGCTATTTGCACTTTGTTGTCTGAGCGATCCTGCTGTGAATTCGATCCATTGACTGTTTTTGACA  
TGACATGTAACCTTCTGCATCCACCAACAGCGTTAACCCAAAGTTAGACCGACGTTCCAGGCCATTATTCTCGA  
ACGTGTAACCTGCCGCTTCTGATAATAAAGTTTGAACGCTCGGATCTTGTACTCCCTGGCCCTGGAATGG  
TATGTGTGTGACCTCATGATTATTAAGTACGGCCACTTTTTAAGCAATCTCATCGCTGGAAGCGGATTTGTAA  
TCTTTCTGCAGTACTTAAGTCAACTCTAAGGAAAACAAATAACAAACTATTAATCAATATCTGTGCTCAAT  
ATCTTCAAGGACCTAATGATCTTGTGAGTCCGTTGGACCGGACGCAACGTTTCAGATCAAC

**>MAM\_PKS1 [Metarhizium album ARSEF 1941]**

ACTTGCCGGTCCGATGCTTACATATGCTCAGTTGCCTGCAGTCTTTGGAATGCAAACTGTGGCTTTTAAAG  
GTTACAGTGGCCTGCTGTCTTTGGAATGCACAACCGCGTTGTTAAAGTTGACCTGAATGGGCGAAACTTT  
GAATAGATGGAGCCAAGAAGGAAAAATCCCCGAACACTCCACGGCACGCCGTGTACATTCCGGGCAAGA  
AAAGTCCATTGCCATGGTGC GGCTCCTGACTAGGCGGTCATCCCATGGACTTGGACCACTCTGCGTGAAT  
ATACAACCTTCTGTTTCTACCGGGGACACGTCCCGACATCGTTAAGCTAAAAGCTAGAAACCGTTCTAGACCA  
CTCTTCCCGACGGCCAGCCAAACCCGCTGTGGTACCAAGGTTTCAAACGCTTCGCTTTCACTACTGGCTTG  
TCCAAAATGGCATGCGGGTGACCTCATGACTATCTGACCATGGACAAAGTAATCTCGCATTATATAGTTTGT  
CCTAGTACTTAAGTAAAAGTAAAGCAAGAAAAGTGAATTGCGGCGTGTGAATACATATCTTGTATCCT  
CTAGGGCCCAACTACCTCGCGTCTGTACATTGTTGGCTTCGAGTCTCGACGCCTGCCTGCATCAAC

**>MAA\_PKS2 [Metarhizium robertsii ARSEF 23]**

TGTTGATATTTATCAAGGGAGCTGCACGTACGGTGCTTAGACCTACTTTCCTTGCAAGTTCAGATTTAGTGCG  
TGGGGCGCAGATGTCGCGGCGCTTATACGAACTACCACGTACGGCGCTTCGTATACAAACAACGCGACA  
GCAAAGTTTCAGGTGCGGCGCTGAAAACGGCTGCCATGCCACATCCAGGACGAGCAGACTGCCTACATAAT  
CAGTTTGCCTCACCGTGCAGACCTGTCGTGGACTAACCTGATCCAACCGCCTCCTCGTAGGTCGTGCTC  
GCGTTGGCAAGGCTGAGCAACATGCGCGCAAGGCCGCTCCAAAACCGCCTCCTGCACTGGTTTACGTCC  
GGTGAGCATACGAATGAACATTGAAGGCAAAGGACCCAGTGTGCGGTGTGCCGGCCGCTAGAGTTGCCG  
TCATAGGCGTGCTTAGCTATAGTCGTAGAAGAGAATCGACAGGGTTGGCTCCGCTTCTATATGCTGTACGG

CCGGATGGGGCGGTGGCCGTTTGACACACAGAATACGACAAGTGCTGAGGAGATGACGACTATAACATGC  
AACTTTTGCCTTGATGGTTGGTGTGAATAGGCCATCTTTCCTCATTCTTTTTGCACTTCTCTAAACCTTGCGAC

**>MAN\_PKS2 [Metarhizium anisopliae ARSEF 549]**

TTTTGTTGATATTTATCAAGGGAGCTGCACGTACGGTGCTTAGACCTACTTTCCTTGCAAGTTCAGATTTAGT  
GCGTGGGGCGCAGATGTCGCGGCGCTTATACGAACTCACACGTACGGCGCTTCGTATACAAAACAACGC  
GACAGCAAAGTTTCAGGTGCGGCGCTGAAAACGGCTGCCATGCCACATCCAGGACGAGCAGACTGCCTAC  
ATAATCAGTTTCGCTTACCCTGTCAGACCTGTCGTGGGCTAACCTGATCCAACCGCTCCTCCGTAGTTCGT  
GCTCGCGTTGGCAAGGCTGAGCAACATGCTCGCAAGGCCCTCCAAAACCGCTCCTGCACTGGTTTCAC  
GTCCGGTGAGCATAACGAATGAACATTGAAGCAAAGGACCCAGTGTTCGGTGTACCGGCCACTAGAGTTG  
CCGTCATAGGCGTGTAGCTATAGACGTAGAATCGACAGGGTTGGCTCCGTCTTCTATGAGGCGTACGGC  
CAGATGGGGCGGTGGCCGTTTGACACGCAGAATACGACAAGTGCTGAGGAGATGACGACTATAACATGCA  
ACTTTTGCCTTGATGGTTGGTGTGAATAGGCCATCTTTCCTCATTCTTTTTGCAATTCTCCAAAACCTTGCGAC

**>MBR\_PKS2 [Metarhizium brunneum ARSEF 3297]**

TTTTGTTGATATTTATCAAGGGAGCTGCACGTACGGTGCTTAGACCTACTTACCTTGCAAGTTCGGATCTAGT  
GCGTGGGGCGCAGATTTTCGCGGCGCTTATACGAACTTTCACGTACGGTGCTTCGTATACAAAACAACGC  
ACAGCAAAGTTTCAGGTGCGGCGCAGAAAACGGCTGCCATGCCCGCATCCACGACGAGCAGACTGCCTACAT  
AATCAGTTTCGCCTACCCTGTCAGACCTGTCGTGGACTAACCTGATCCAACCGCTCCTCCGTTGGTTGGTA  
GTGCTCCCGTTGGCAAGGCTGAGCAACATGAGCCAAAGACCGCTCCAAAACCGCTCCTGCACTGGTTTC  
ACGCCCGGTGAGCATAACGACTGAAGCAAAGGACCCAGTGTTCGGTGTGCCGGCCGCTAGAGTTGCCGT  
CATAGGCGTGTAGCTATAGTCGTAGAAGAGAATCGACAGGGTTGGCTCCGTCTGGTATACACCGTACGG  
CCGGATGGGGCGCTGGCCGTTTGACACGCAGAATACGACAAGTGCTGACGAGATGACGACTATAACATGCA  
ACTTTTGCCTTGATGGTTGGTGTGAATAGGCCATCTTTCCTCATTCTTTTTGCACTTCTCTAAACCTTGCGAC

**>MGU\_PKS2 [Metarhizium guizhouense ARSEF 977]**

GACTTGGCTTTTGTGATATTTATCAAGGGAGCTGCACGTACGGTGCTTAGACCTACTTACCTTGCAAGTTCA  
GATTTAGTGCGTGGGGCGCAGATGTCGCGGCGCTTATACGAACTTACCACGTACGGTGCTTCGTATACAAA  
CAACGCGACAGCAAAGTTTCAGGTGCGGCGCAGAAAACGGCTGCCATGCCCGCATCCAGGACGAGCAGACT  
GCCTACATAATCAGTTTCGCTTACCCTGTCAGACCTGTCGTGGACTAACCTGATCCAACCGCTCCTCCGTT  
GGTCGTGCCACGTTGGCAAGGCTGAGCAACATGTGCGCAAGACTGCCTCCAAAACCGCTCCTGCACTGG  
TTTACGCCCGGTGAGCATACAACTGAAGCAAAGGACCCAGTGTTCGGTGTACCGGCCGCTAGAGTTGC  
CGTCACAGGCGTGTAGCTATAGACGTAGAATCGACAGGGTTGGCTCCGTCTTCTATACACCGTACGGCC  
AGATGGGGCGGTGGCCTTTTGACACGCAGCATAACGACAAGTGCTGAGGAGATGACGACTATAACATGCAAC  
TTTTGCCTTGATGGTTGGTGTGAATAGGCCATCTTTCCTCATTCTTTTTGCACTTCTCCAAAACCTCGCGAC

**>MAJ\_PKS2 [Metarhizium majus ARSEF 297]**

GGCTTTTGTGATATTTATCAGGGGCGCTGCACGCACGGTGCTTAGACCTACTTACCTTGCAAGTTCAGATTT  
AGTGCGTGGGGCGCATATGTCGCGGCGCTTATACGAACTTACCACGTACGGTGCTTCGTATACAAAACAAGG  
CGACAGCAAAGTTTCAGGTGCGGCGCAGAAAACGGCTGCCATTCCCGCATCCAGGGCGAGCAGACTGCCTA  
CATAATCAGTTTCGCTTACCCTGTCAGACCTGTCGTGGACTAACCTGATCCAACCGCTCCTCCGTTGGTC  
GTGCTCGCGTTGGCAAGGCTGAGCAACACGTGCGCAAGACTGCCTCCAAAACCGCTCCTGCACTGGTTTC  
ATGCCCGGTGAGCATACAACTGGAGGCAAAGGACCCAGTATTGCGGTGTACCGGCCGCTAGAGTTGCCGTC  
ACAGGCGTGTAGCTATAGACGTAGAATCGGCAGGGTTGGCTCCGTCTTCTATACACCGTACGGCCAGAT

GGGGCGGTGGCCTTTGACACGCTGGCAGCAGACGACAGGTGCTGAGGAGATGACGACTATAACATGCAAC  
TTTTGCCTTGATGGTTGGTGTGAATAGGCCATCTTTCCTCATTCTTCTTTGCACTTCTCCAAAACCTCGCGAC

**>MAC\_PKS2 [Metarhizium acridum CQMa 102]**

CGGTTTCATCATTTGGCCTGTTTCATCTAGTAGGTGTCGTGAAATCAAGTCCTTCCCAGAGACGGCTGTACTAA  
CAAGCTCAGCAAATATGGCAACGCGGGATGCCGCTACCCCAATGGGCAAGATATCCATGTGGCGGGAATGT  
GCGTGGGCTCGTTGGCAGCAGCAGCAGTCAGTTGCTCCCGCTCCATAGGAGATCTAATAATAACTGGCATCG  
TTGCCATCCGGGCCGCCTTGAGAGTAGGCCAGCGGGCCCATCAGGCGGCCCTGCTCATCAGCAATAGAGCA  
GTACCTCCCACACATTGGTTCGTACGCCGTTTCAACCGAGTCACTGCCGCTGGACTTGATAACCGATGCACTT  
GCAAAGTTTGCAGAAAACATGGTATAGTGTGGTGGTCAACAGCAAGAACGGAGAACAATTCGTTAACAGA  
CTGTGACAGGATACCTCTCCTAAGTAATCCCTATATCAGCGCTATCGGTTTAGATTAGTCACTATCAGCGG  
ACCTCCAAGCCAACCTGCATCAGTTTTGGCAAGAAAACACACCTTCACACAAACCAATCTCTATCCCCATCTGG  
GCTCCATATCATGGACCTCACATTTTTGGGGATATTGATATCGAAACCATTATAAAGAGTCTACATCCA
